# Supplementary material for: Rhythmic Diel Pattern of Gene Expression in Juvenile Maize Leaf
Source: PLoS One. 2011 Aug 17;6(8):e23628. doi: 10.1371/journal.pone.0023628 (PMC3157397; doi:10.1371/journal.pone.0023628)
Supplement: Table S1 — Annotation of cycling genes and clustering of gene expression profiles. Clusters created with pvclust were further combined manually into four groups (“night”, “dawn”, “day” and “dusk”). (XLS) [file pone.0023628.s008.xls]

## Sheet: Arkusz2
Table S1. Annotation of genes and clustering of genes' expression profiles. Clusters created with pvclust were clustered manually into four groups ("night", "dawn", "day" and "dusk").
night
Maizearray probe ID	cluster number	Khan et al., 2010	Hayes et al., 2010	gene annotation (Zea mays)	gene annotation (Arabidopsis thaliana)	transcription factor	cell component
MZ00019724, MZ00022266	1	x		LOC100193195 (hypothetical protein LOC100193195)	COL9 (CONSTANS-LIKE 9); transcription factor/ zinc ion binding	COL9 (CONSTANS-LIKE 9); transcription factor/ zinc ion binding
MZ00029501	1			T22P22.180 (hypothetical protein LOC100272647)	Ndr family protein
MZ00005169	2			LOC100194210 (hypothetical protein LOC100194210)
MZ00026417	2			F10A16.11 (hypothetical protein LOC100383467)	beta-fructofuranosidase, putative / invertase, putative / saccharase, putative / beta-fructosidase, putative
MZ00037281, MZ00044002	2			BGL2 (lichenase-2)	glucan 1,3-beta-glucosidase/ hydrolase
MZ00057252	2			LOC100192077 (hypothetical protein LOC100192077)	ATL8; protein binding / zinc ion binding/ubiquitin ligase
MZ00004141	3			AT3G18450 (LOC100284351)
MZ00005308	3	x		AT3G29240 (hypothetical protein LOC100273474)
MZ00015786, MZ00037391	3			AY110835 (LOC100193211	zinc finger (C3HC4-type RING finger) family protein	zinc finger (C3HC4-type RING finger) family protein
MZ00025265	3			ETFALPHA (hypothetical protein LOC100191322	ETFALPHA (electron transfer flavoprotein alpha); FAD binding / electron carrier		mitochondrion
MZ00032521	3			LOC100191538 (hypothetical protein LOC100191538)
MZ00029002	3			LOC100278388 (hypothetical protein LOC100278388)			plastid
MZ00019982	3			LOC100285216 (circadian clock coupling factor ZGT)	EDL2 (EID1-like 2)
MZ00020433	3			LOC100382861 (hypothetical protein LOC100382861
MZ0003796	3			LOC541740 (R2R3MYB-domain protein)		LOC541740 (R2R3MYB-domain protein)
MZ0000521	3			LOX2 (lipoxygenase11)	LOX2 (LIPOXYGENASE 2); lipoxygenase
MZ00040553	3			MED24.5 (malate synthase1)	MLS (MALATE SYNTHASE); malate synthase
MZ00031099	3			Os03g0422800 (protein kinase1) putative receptor protein kinase ZmPK1 precursor
MZ00050532	3			Os04g0665600 (transfactor)	myb family transcription factor	myb family transcription factor
MZ00004515	3			Os07g0268800 (hypothetical protein LOC100383195)
MZ00001143	3			Os07g0542400 (receptor-like protein kinase RK20-1	CRK10 (CYSTEINE-RICH RLK10); ATP binding / kinase/ protein kinase/ protein serine/threonine kinase/ protein tyrosine kinase
MZ00005521, MZ00036173	3			pco140340(678) (LOC100384853)	DNA primase, large subunit family
MZ00055363	3			yptm1 (ypt homolog1)	ARA-5 (ARABIDOPSIS RAS 5); GTP binding
MZ00023269	4			LOC100274683 (hypothetical protein LOC100274683)
MZ00043913	4			F1N21.14 (hypothetical protein LOC100191752)	DNA primase, large subunit family
MZ00016836	5			ABA2 (short chain alcohol dehydrogenase1)	ABA2 (ABA DEFICIENT 2); alcohol dehydrogenase/ oxidoreductase/ xanthoxin dehydrogenase
MZ00021926	5			ACR5 (hypothetical protein LOC100192085)	ACR4 (ACT REPEAT 4); amino acid binding
MZ00019325	5			AFB3 (transport inhibitor response 1 protein	AFB3 (AUXIN SIGNALING F-BOX 3); auxin binding / ubiquitin-protein ligase
MZ00041721	5			AGD10 (hypothetical protein LOC100216842)	AGD8 (ARF-GAP DOMAIN 8); ARF GTPase activator/ DNA binding / zinc ion binding
MZ00028245	5			AGT (LOC100281949)	AGT (ALANINE:GLYOXYLATE AMINOTRANSFERASE); alanine-glyoxylate transaminase/ serine-glyoxylate transaminase/ serine-pyruvate transaminase
MZ00030467	5			AHK2 (histidine kinase3	(ARABIDOPSIS HISTIDINE KINASE 2)		membrane
MZ00014822	5			AK-HSDH/AK-HSDH II (aspartate kinase homoserine dehydrogenase2) bifunctional aspartokinase/homoserine dehydrogenase 2, chloroplastic precursor	AK-HSDH I (ASPARTATE KINASE-HOMOSERINE DEHYDROGENASE I); aspartate kinase/ homoserine dehydrogenase
MZ00041976	5			AME3 (hypothetical protein LOC100194024)	AME3; ATP binding / kinase/ protein kinase/ protein serine/threonine kinase		plastid
MZ00012881	5			ANAC083 (NAC domain-containing protein 68	ANAC083 (Arabidopsis NAC domain containing protein 83); transcription factor	ANAC083 (Arabidopsis NAC domain containing protein 83); transcription factor
MZ00027685	5			APRL9 (adenosine 5'-phosphosulfate reductase-like9)
MZ00042277	5			APRR4 (response regulator 8	APRR4 (PSEUDO-RESPONSE REGULATOR 4); transcription factor/ two-component response regulator	APRR4 (PSEUDO-RESPONSE REGULATOR 4); transcription factor/ two-component response regulator
MZ00017970	5			AR401 (SLL2	AR401
MZ00027216	5			ARA3 (LOC100282517	ATRAB8A; GTP binding
MZ00037830	5			ASF1B (anti-silencing protein 1)	SGA2
MZ00043315	5	x		AT1G02305 (LOC100283781	cathepsin B-like cysteine protease, putative		membrane
MZ00016303, MZ00028712	5			AT1G08570 (hypothetical protein LOC100193986)	ACHT4 (ATYPICAL CYS HIS RICH THIOREDOXIN 4); oxidoreductase, acting on sulfur group of donors, disulfide as acceptor
MZ00029663	5			AT1G60995 (LOC100383714
MZ00012976	5			AT2G20495 (LOC100193134
MZ00020643	5			AT2G41030 (protein binding protein)	WW domain-containing protein
MZ00029193	5			AT3G10250 (LOC100283224
MZ00025191	5			AT3G12150 (LOC100276119)
MZ00015727	5			AT3G14830
MZ00026740	5			AT3G18430 (calcineurin subunit B)	calcium-binding EF hand family protein
MZ00016074, MZ00017939	5			AT3G24530 (hypothetical protein LOC100193785)	AAA-type ATPase family protein / ankyrin repeat family protein
MZ00016460	5			AT3G26900 (shikimate kinase family protein)	shikimate kinase family protein		plastid
MZ00016175	5			AT3G32940 (hypothetical protein LOC100383283)			mitochondrion
MZ00030256	5			AT3G51000 (LOC100281378)	epoxide hydrolase, putative
MZ00020757	5	x		AT3G59320 (hypothetical protein LOC100193708)			membrane
MZ00015906	5			AT3G59600 (LOC100281008)	DNA-directed RNA polymerase I, II, and III, putative
MZ00007104, MZ00029837	5	x		AT3G59710 (hypothetical protein LOC100383092)	short-chain dehydrogenase/reductase (SDR) family protein
MZ00025365	5			AT3G62970 (RING finger and CHY zinc finger domain-containing protein 1	zinc finger (C3HC4-type RING finger) family protein	zinc finger (C3HC4-type RING finger) family protein
MZ00026923	5			AT3G63510	nitrogen regulation family protein
MZ00007386, MZ00030924	5			AT4G02470	AAA-type ATPase family protein		plastid
MZ00016374	5			AT4G32285 (hypothetical protein LOC100382088)	binding; epsin N-terminal homology (ENTH) domain-containing protein / clathrin assembly protein-related
MZ0005121	5			AT5G11020 (hypothetical protein LOC100217243)	protein kinase family protein
MZ0006900	5			ATATH9 (hypothetical protein LOC100272598)	ATATH9; transporter
MZ00042214	5	x		ATCES1 (hypothetical protein LOC100273412)	ATCES1; catalytic/ hydrolase, acting on carbon-nitrogen (but not peptide) bonds, in linear amides
MZ00055151	5			ATGCN3 (LOC100192636)	ATGCN3; transporter
MZ00020198	5			ATHM4 (thioredoxin M10) thioredoxin M-type, chloroplastic precursor	thioredoxin m
MZ00015373	5			AtRABA1g (hypothetical protein LOC100272710)	AtRABA1f (Arabidopsis Rab GTPase homolog A1f); GTP binding
MZ00041424, MZ00041425	5			ATVAMP725 (vesicle-associated membrane protein 725)	VAMP721 (VESICLE-ASSOCIATED MEMBRANE PROTEIN 721)		membrane
MZ00013792, MZ00041222	5			AY104017 (hypothetical protein AY104017) ubiquitin conjugating enzyme	UBC11 (UBIQUITIN-CONJUGATING ENZYME 11); ubiquitin-protein ligase
MZ00055277	5	x		AY106592 (hypothetical protein AY106592)
MZ00028499	5			AY110514 (LOC10027288	2-oxoglutarate-dependent dioxygenase, putative
MZ00003712	5			CAM8 (calcium ion binding protein)
MZ00014170	5			cc7 (cystatin7)
MZ00030112	5			CHR5	CHR5 (chromatin remodeling 5); ATP binding / DNA binding / chromatin binding / helicase/ nucleic acid binding		nucleus
MZ00020139	5			CIPK3 (LOC100281727)	CIPK3 (CBL-INTERACTING PROTEIN KINASE 3); kinase/ protein kinase/ protein serine/threonine kinase
MZ00026243	5			cl2817_2a (LOC100279311)
MZ00043663	5			cl5021_1 (LOC100216691)
MZ00017297	5			cl65448_1a (LOC100384109	glycine-rich protein
MZ00013387	5			cl9687_1 (LOC100283785)	PP2AA2 (PROTEIN PHOSPHATASE 2A SUBUNIT A2); protein phosphatase type 2A regulator
MZ00001848	5			CLC-B (hypothetical protein LOC100383583)	chloride channel-like (CLC) protein, putative
MZ00023168	5			CNR02 (cell number regulator 2)
MZ00026558	5			CNR13 (cell number regulator 13)	MCA1 (mid1-complementing activity 1)
MZ00015378	5			CT-BMY (hypothetical protein LOC100192000)	BAM1 (BETA-AMYLASE 1); beta-amylase		plastid
MZ00030007	5			CYP77A5P (hypothetical protein LOC100384695)	CYP77A5P; catalytic
MZ00056616	5			CYP90D1 (hypothetical protein LOC100384722)	ROT3 (ROTUNDIFOLIA 3); oxidoreductase, acting on paired donors, with incorporation or reduction of molecular oxygen, NADH or NADPH as one donor, and incorporation of one atom of oxygen / oxygen binding / steroid hydroxylase
MZ00019029	5			DIN10 (alkaline alpha galactosidase 2)	DIN10 (DARK INDUCIBLE 10); hydrolase, hydrolyzing O-glycosyl compounds
MZ00026322	5			DL4610W (hypothetical protein LOC100383953)
MZ00030273	5			DL4720W (hypothetical protein LOC100276377)	oxidoreductase family protein
MZ00022846	5			EBF2 (LOC100279520)	EBF1 (EIN3-BINDING F BOX PROTEIN 1); protein binding / ubiquitin-protein ligase
MZ00025263	5			ETFALPHA (hypothetical protein LOC100191322	ETFALPHA (electron transfer flavoprotein alpha); FAD binding / electron carrier		mitochondrion
MZ00017318	5			F10A12.16 (hypothetical protein LOC1002736	calcium-binding EF hand family protein
MZ00026811	5			F10F5.8 (hypothetical protein LOC100274167	zinc finger (C3HC4-type RING finger) family protein	zinc finger (C3HC4-type RING finger) family protein
MZ00013115	5			F11M15.20 (MATE family protein)	MATE efflux family protein
MZ00013458	5			F11M15.7 (hypothetical LOC542155)	60S ribosomal protein L31 (RPL31C)
MZ00027477	5			F11O6.14 (LOC732729)	protein phosphatase 2C, putative / PP2C, putative
MZ00019981	5			F12A21.7 (hypothetical protein LOC100279782)	RGLG2 (RING domain Ligase2); ubiquitin-protein ligase
MZ00014568	5			F12B17.300 (LOC100194063)	polyadenylate-binding protein family protein / PABP family protein
MZ00024652	5			F13E7.31 (hypothetical protein LOC100383303)	protein phosphatase 2C family protein / PP2C family protein		plastid
MZ00020388	5			F14N22.4 (hypothetical protein LOC100382567)
MZ00025966	5			F15F15.2	F-box family protein
MZ00016075	5			F15N18.90 (LOC100283739)
MZ00028076	5			F16F14.25 (wound and phytochrome signaling involved receptor like kinase)	leucine-rich repeat transmembrane protein kinase, putative		membrane
MZ00025943	5			F16P2.4 (LOC100285059)	zinc finger (CCCH-type) family protein / RNA recognition motif (RRM)-containing protein
MZ00026324	5			F17J6.19 (hypothetical protein LOC100279494)	OTU-like cysteine protease family protein
MZ00025234	5			F17L21.13 (LOC100193727)	F-box family protein
MZ00027743	5			F18G18.100 (hypothetical protein LOC100275083)
MZ00015791	5	x		F19G10.17 (hypothetical protein LOC100194347)
MZ00017994	5			F19K6.8 (hypothetical protein LOC100384527)	protein kinase family protein / C-type lectin domain-containing protein
MZ00033197	5			F20H23.5 (hypothetical protein LOC100217102)	adenylylsulfate kinase, putative
MZ00026617	5			F21M12.31 (XIAP associated factor-1)	TRAF-type zinc finger-related		plastid
MZ00019186	5			F22H5.7 (cytosolic purine 5-nucleotidase)	5' nucleotidase family protein		plastid
MZ00024804	5			F23H14.3 (MYB-CC type transfacto	myb family transcription factor	F23H14.3 (MYB-CC type transfacto	nucleus
MZ00044598	5			F24B9.19 (hypothetical protein LOC100381797)	ankyrin repeat family protein		membrane
MZ00014609	5			F28I8.27 (CREG1 protein)	cellular repressor of E1A-stimulated genes (CREG) family		membrane
MZ00018819	5			F2D10.26 (LOC100277268)
MZ00025861	5			F2N1.34 (LOC100217186)
MZ00019158	5			F3C3.12 (lrgB-like family protein)	membrane protein, putative		plastid
MZ00026332	5			F5D14.32 (LOC100281250)	vacuolar protein sorting 55 family protein / VPS55 family protein		membrane
MZ00044282	5			F5M6.18	formin homology 2 domain-containing protein / FH2 domain-containing protein		membrane
MZ00044126	5			F6E13.26 (hypothetical protein LOC100383172)	kelch repeat-containing F-box family protein
MZ00027513	5			F7A10.28 (LOC100193397	kelch repeat-containing F-box family protein
MZ00003984	5			F8K7.22 (LOC100217158)	BTB/POZ domain-containing protein
MZ00029117	5			F8L10.3 (LOC100191195)	RNA-binding S4 domain-containing protein
MZ00019499	5	x		FTSH11	FTSH11 (FtsH protease 11); ATP-dependent peptidase/ ATPase/ metallopeptidase		plastid
MZ00030122	5			GAUT4 (transferase, transferring glycosyl groups)	GAUT4 (Galacturonosyltransferase 4); polygalacturonate 4-alpha-galacturonosyltransferase/ transferase, transferring glycosyl groups
MZ00023450	5		x	gpm454 (LOC100284784)	STO (SALT TOLERANCE); DNA binding / protein binding / transcription factor/ zinc ion binding	STO (SALT TOLERANCE); DNA binding / protein binding / transcription factor/ zinc ion binding
MZ00042166	5			gpm517 (LOC100279481	AHBP-1B; DNA binding / transcription activator/ transcription factor/ transcription repressor	AHBP-1B; DNA binding / transcription activator/ transcription factor/ transcription repressor
MZ00043475	5			GSNAP (hypothetical protein LOC100273308	GSNAP (GAMMA-SOLUBLE NSF ATTACHMENT PROTEIN); binding / transporter
MZ00017612	5			gst28 (glutathione transferase28)	ATGSTU8 (GLUTATHIONE S-TRANSFERASE TAU 8); glutathione transferase
MZ00017131	5			HHP4	HHP4 (heptahelical protein 4); receptor		membrane
MZ00043645	5			HO3 (hypothetical protein LOC100193737	ho3 (HEME OXYGENASE 3); heme oxygenase (decyclizing)
MZ00016734	5			HPR (hypothetical protein LOC10019370	NAD binding / cofactor binding / oxidoreductase, acting on the CH-OH group of donors, NAD or NADP as acceptor
MZ00057368	5	x		IDPC175 (LOC100274593)	HSP18.2 (heat shock protein 18.2)
MZ00016252	5			IPP2	IPP2 (ISOPENTENYL PYROPHOSPHATE:DIMETHYLALLYL PYROPHOSPHATE ISOMERASE 2); isopentenyl-diphosphate delta-isomerase		plastid
MZ00032402	5			ISI1 (hypothetical protein LOC100272392	ISI1 (IMPAIRED SUCROSE INDUCTION 1); binding
MZ00048792	5			K10A8.120 (hypothetical protein LOC100278423
MZ00027975	5			K2A18.23 (hypothetical protein LOC100193937)	glycosyl hydrolase family 38 protein		membrane
MZ00018224	5			K7J8.8 (LOC100276785
MZ00020908	5			KEU (SNARE-interacting protein KEULE)	KEU (keule); protein transporter		membrane
MZ00021922	5			kip (knotted interacting protein1)	BLH11 (BEL1-LIKE HOMEODOMAIN 11); transcription factor	BLH11 (BEL1-LIKE HOMEODOMAIN 11); transcription factor
MZ00042163	5			KPHMT1/PANB1 (3-methyl-2-oxobutanoate hydroxymethyltransferase)	3-methyl-2-oxobutanoate hydroxymethyltransferase
MZ00003927	5			LHCA5 (LOC100281795	LHCA5 (Photosystem I light harvesting complex gene 5)
MZ00015888	5			lhcb4 (light harvesting complex a/b protein4	LHCA5; pigment binding
MZ00056525	5			LOC100037766 (NADP-linked malic enzyme)	ATNADP-ME2 (NADP-malic enzyme 2); malate dehydrogenase (oxaloacetate-decarboxylating) (NADP+)/ malic enzyme/ oxidoreductase, acting on NADH or NADPH, NAD or NADP as acceptor
MZ00041233	5			LOC100101516 (zein-alpha 19D1)
MZ00041513	5			LOC100101524 (wound-induced protease inhibitor)
MZ00033361	5			LOC100191824 (hypothetical protein LOC100191824
MZ00041180	5			LOC100191938 (hypothetical protein LOC100191938)	DREPP plasma membrane polypeptide family protein
MZ00015313	5			LOC100192781 (hypothetical protein LOC100192781)
MZ00043646	5			LOC100192807 (hypothetical protein LOC100192807)	ho3 (HEME OXYGENASE 3); heme oxygenase (decyclizing)
MZ00016845	5			LOC100193146 (hypothetical protein LOC100193146)	transporter
MZ00056697	5			LOC100193337 (hypothetical protein LOC100193337)	SYP52 (SYNTAXIN OF PLANTS 52); SNAP receptor
MZ00014878	5			LOC100193364 (hypothetical protein LOC100193364)	RPT2a (regulatory particle AAA-ATPase 2a); ATPase
MZ00027518	5			LOC100193371 (hypothetical protein LOC100193371)	zinc finger (C3HC4-type RING finger) family protein
MZ00013215	5			LOC100193442 (hypothetical protein LOC100193442)	AFO (ABNORMAL FLORAL ORGANS); protein binding / transcription factor/ transcription regulator	AFO (ABNORMAL FLORAL ORGANS); protein binding / transcription factor/ transcription regulator
MZ00013197	5			LOC100193502 (hypothetical protein LOC100193502)
MZ00017720	5			LOC100193630 (hypothetical protein LOC100193630)
MZ00027704	5			LOC100193984 (hypothetical protein LOC100193984)	GTP cyclohydrolase I		mitochondrion
MZ00041481	5			LOC100194017 (hypothetical protein LOC100194017)
MZ00015580	5			LOC100194046 (hypothetical protein LOC100194046)
MZ00044449	5			LOC100216644 (hypothetical protein LOC100216644)	peroxidase, putative
MZ00028834	5			LOC100216992 (hypothetical protein LOC100216992)	ATP-dependent RNA helicase, putative
MZ00021970	5			LOC100217045 (hypothetical protein LOC100217045)	AHP4 (HPT PHOSPHOTRANSMITTER 4); histidine phosphotransfer kinase/ transferase, transferring phosphorus-containing groups
MZ00041133	5	x		LOC100217074 (hypothetical protein LOC100217074)	UBC7 (UBIQUITIN CARRIER PROTEIN 7); protein binding / ubiquitin-protein ligase
MZ00035629, MZ00040579, MZ00042962	5	x		LOC100217303 (hypothetical protein LOC1002173	ACT7 (ACTIN 7); structural constituent of cytoskeleton
MZ0005182	5			LOC100272434 (hypothetical protein LOC100272434)
MZ00000738	5			LOC100272576 (hypothetical protein LOC100272576)	cytidine/deoxycytidylate deaminase family protein
MZ00015918	5			LOC100272701 (hypothetical protein LOC100272701) MTD1
MZ00039449	5	x		LOC100272715 (hypothetical protein LOC100272715	dormancy/auxin associated family protein
MZ00026403	5			LOC100273227 (hypothetical protein LOC100273227	3'-5' exonuclease domain-containing protein / K homology domain-containing protein / KH domain-containing protein
MZ00025695, MZ00043826	5	x		LOC100273324 (hypothetical protein LOC100273324)	Per1-like family protein
MZ00025854	5			LOC100273353 (hypothetical protein LOC100273353)	methyltransferase/ nucleic acid binding
MZ00014462	5			LOC100273517 (hypothetical protein LOC100273517)	ZAC; ARF GTPase activator/ phospholipid binding
MZ00028873	5			LOC100274176 (hypothetical protein LOC100274176)	mitochondrionondrial substrate carrier family protein
MZ00042503	5			LOC100274358 (hypothetical protein LOC100274358)	CYP72A11; electron carrier/ heme binding / iron ion binding / monooxygenase/ oxygen binding
MZ00025834	5			LOC100274398 (hypothetical protein LOC100274398)
MZ00005279	5	x		LOC100274525 (hypothetical protein LOC100274525)	CYP714A1; electron carrier/ heme binding / iron ion binding / monooxygenase/ oxygen binding
MZ00030890	5			LOC100274661 (hypothetical protein LOC100274661)
MZ00001643	5			LOC100274800 (hypothetical protein LOC100274800)
MZ00018086	5			LOC100274966 (hypothetical protein LOC100274966)
MZ00056591	5			LOC100275115 (hypothetical protein LOC100275115)
MZ00027546	5			LOC100275377 (hypothetical protein LOC100275377)
MZ00012918	5			LOC100275780 (hypothetical protein LOC100275780)	ATP binding / ATPase/ nucleoside-triphosphatase/ nucleotide binding / protein binding
MZ00024495	5			LOC100275840 (hypothetical protein LOC100275840)
MZ00041607	5			LOC100275867 (hypothetical protein LOC100275867)
MZ00024638	5			LOC100275934 (hypothetical protein LOC100275934)
MZ00016848	5			LOC100276463 (hypothetical protein LOC100276463)
MZ00030147	5			LOC100277104 (hypothetical protein LOC100277104)	HEXO3 (BETA-HEXOSAMINIDASE 3); beta-N-acetylhexosaminidase/ hexosaminidase
MZ00018402	5			LOC100277208 (hypothetical protein LOC100277208)
MZ00018278	5			LOC100277231 (hypothetical protein LOC100277231)	CRR23 ((chlororespiratory reduction 23)
MZ00047725	5			LOC100277302 (hypothetical protein LOC100277302)
MZ00019082	5			LOC100277433 (hypothetical protein LOC100277433)
MZ00029945	5			LOC100277601 (hypothetical protein LOC100277601
MZ00014329	5			LOC100278280 (hypothetical protein LOC100278280)
MZ00029883	5			LOC100278544 (hypothetical protein LOC100278544
MZ00020448	5			LOC100278683 (hypothetical protein LOC100278683	hydroxyproline-rich glycoprotein family protein
MZ00027354	5			LOC100278696 (hypothetical protein LOC100278696)
MZ00017196, MZ00017197	5			LOC100278813 (hypothetical protein LOC100278813)
MZ00016123	5			LOC100279000 (hypothetical protein LOC100279000)
MZ00041567	5	x		LOC100279088 (hypothetical protein LOC100279088)
MZ00017271, MZ00043769	5			LOC100279184 (hypothetical protein LOC100279184)	protein transporter
MZ00015715	5			LOC100279232 (hypothetical protein LOC100279232)	lesion inducing protein-related
MZ00033321	5			LOC100279495 (hypothetical protein LOC100279495)	AtGUS1 (Arabidopsis thaliana glucuronidase 1); beta-glucuronidase
MZ00022932	5	x		LOC100279540 (hypothetical protein LOC100279540)	ZFHD1 (ZINC FINGER HOMEODOMAIN 1); DNA binding / transcription activator/ transcription factor	ZFHD1 (ZINC FINGER HOMEODOMAIN 1); DNA binding / transcription activator/ transcription factor
MZ00035416	5			LOC100279572 (hypothetical protein LOC100279572)	binding
MZ00021082	5	x		LOC100279586 (hypothetical protein LOC100279586
MZ00023558	5			LOC100280031 (hypothetical protein LOC100280031)	MUB6 (MEMBRANE-ANCHORED UBIQUITIN-FOLD PROTEIN 6 PRECURSOR
MZ00026772	5			LOC100280093 (hypothetical protein LOC100280093)	basic helix-loop-helix (bHLH) family protein
MZ00055782	5			LOC100280121 (hypothetical protein LOC100280121)
MZ00001302	5			LOC100280156 (hypothetical protein LOC100280156)	protein kinase family protein
MZ00024250	5			LOC100280203 (hypothetical protein LOC100280203	ATCS; ATP binding / ATP citrate synthase/ citrate (SI)-synthase
MZ00046568	5			LOC100281055 (sorbitol transporter	mannitol transporter, putative
MZ00031923	5			LOC100281081 (potassium transporter 10)	potassium transporter, putative
MZ00024717	5			LOC100281478 (TBC domain containing protein)	RAB GTPase activator
MZ00028941	5			LOC100282672 (naringenin,2-oxoglutarate 3-dioxygenase	SRG1 (SENESCENCE-RELATED GENE 1); oxidoreductase, acting on diphenols and related substances as donors, oxygen as acceptor / oxidoreductase, acting on paired donors, with incorporation or reduction of molecular oxygen, 2-oxoglutarate as one donor, an
MZ00031939	5			LOC100282685 (DHHC zinc finger domain containing protein	zinc finger (DHHC type) family protein	LOC100282685 (DHHC zinc finger domain containing protein
MZ00015876	5			LOC100282694 (CBF1 interacting corepressor)
MZ00014742	5			LOC100282834 (PP2Ac-5 - Phosphatase 2A isoform 5 belonging to family 2)	PP2A-3 (PROTEIN PHOSPHATASE 2A-3); protein serine/threonine phosphatase
MZ00057143	5			LOC100282836 (60S ribosomal protein L37)	60S ribosomal protein L37 (RPL37A)
MZ00043977	5			LOC100283041 (CTD-phosphatase-like protein)	NLI interacting factor (NIF) family protein
MZ00016176	5			LOC100283240 (ELMO domain-containing protein 2)	phagocytosis and cell motility protein ELMO1-related
MZ00014728	5			LOC100283430 (seed specific protein Bn15D1B)
MZ00030825	5			LOC100283540 (seed specific protein Bn15D14A)
MZ00041508	5			LOC100283731 (ubiquitin-conjugating enzyme E2 I)	SCE1 (SUMO CONJUGATION ENZYME 1); SUMO ligase
MZ00036631	5			LOC100284038 (receptor-like protein kinase)	leucine-rich repeat family protein / extensin family protein
MZ00017013	5			LOC100284528 (lachrymatory-factor synthase)
MZ00016727	5			LOC100285542 (hydrolase/ protein serine/threonine phosphatase)
MZ00012589	5			LOC100285934 (lachrymatory-factor synthase)
MZ00017085	5			LOC100304068 (hypothetical protein LOC100304068)
MZ00029993, MZ00050328	5			LOC100304307 (hypothetical protein LOC100304307)
MZ00027326	5			LOC100304313 (hypothetical protein LOC100304313)
MZ00041494	5			LOC100304386 (hypothetical protein LOC100304386)
MZ00027773	5			LOC100381535 (hypothetical protein LOC100381535)
MZ00017079	5			LOC100381701 (hypothetical protein LOC100381701)
MZ00001666	5			LOC100381762 (hypothetical protein LOC100381762)
MZ00052059	5			LOC100381844 (hypothetical protein LOC100381844)	FPF1 (FLOWERING PROMOTING FACTOR 1)	FPF1 (FLOWERING PROMOTING FACTOR 1)
MZ00024795	5			LOC100381875 (hypothetical protein LOC100381875)
MZ00025965, MZ00055132	5			LOC100381894 (hypothetical protein LOC100381894)	F-box family protein
MZ00042494	5			LOC100382248 (hypothetical protein LOC100382248)	chloroplast nucleoid DNA-binding protein, putative
MZ00027336	5			LOC100382291 (hypothetical protein LOC100382291)	phosphoglycerate/bisphosphoglycerate mutase family protein
MZ00022669	5			LOC100382472 (hypothetical protein LOC100382472)	zinc finger (C3HC4-type RING finger) family protein
MZ00016701, MZ00016702	5			LOC100382954 (hypothetical protein LOC100382954)	GCN5-related N-acetyltransferase (GNAT) family protein
MZ00028882	5			LOC100383464 (hypothetical protein LOC100383464)	PAT1 (phytochrome a signal transduction 1); signal transducer/ transcription factor	PAT1 (phytochrome a signal transduction 1); signal transducer/ transcription factor
MZ00028356	5			LOC100383886 (hypothetical protein LOC100383886
MZ00027217	5			LOC100383919 (hypothetical protein LOC100383919
MZ00044163	5			LOC100384268 (hypothetical protein LOC100384268)
MZ00016119, MZ00042028	5	x		LOC100384329 (hypothetical protein LOC100384329)	dehydration-responsive family protein
MZ0004394	5			LOC100384413 (hypothetical protein LOC100384413)
MZ00020784	5			LOC100384497 (hypothetical protein LOC100384497	DNAJ heat shock family protein
MZ00027744	5			LOC100384525 (hypothetical protein LOC100384525)
MZ00031765	5			LOC100384730 (hypothetical protein LOC100384730)
MZ00026722	5			LOC100384827 (hypothetical protein LOC100384827)	ATEXLA3 (arabidopsis thaliana expansin-like a3)
MZ00044329	5			LOC541947 (glycine cleavage H-protein)
MZ00024462	5			LOC542149 (MAPK) MPK14 - putative MAPK	ATMPK13; MAP kinase/ kinase
MZ00026312	5			LOC542181 (tousled-like kinase 1)	TSL (TOUSLED); kinase/ protein serine/threonine kinase
MZ00016705	5	x		LOC542183 (receptor-like protein kinase)	ARK3 (A. THALIANA RECEPTOR KINASE 3); kinase/ transmembrane receptor protein serine/threonine kinase
MZ00015321	5			LOC542308 (cyclin IaZm	CYC1BAT; cyclin-dependent protein kinase regulator
MZ00042064	5			LOC542637 (LOC542637)	casein kinase II alpha chain, putative
MZ00026842	5			LOC542713 (ferredoxin NADP reductase1)	ATRFNR2 (ROOT FNR 2); FAD binding / NADP or NADPH binding / electron carrier/ ferredoxin-NADP+ reductase/ oxidoreductase
MZ00024546	5			LOC732783 (DIP1	nucleic acid binding		plastid
MZ00043678	5			MAPKKK6 (LOC100274088)	MAPKKK7; ATP binding / binding / kinase/ protein kinase/ protein serine/threonine kinase/ protein tyrosine kinase
MZ00028002	5			MBD2.16 (LOC542205)
MZ00027955	5			MBK5.11 (LOC100279341)	DEAD box RNA helicase, putative
MZ00025372	5			MCA23.18 (adenylate kinase1)	AMK2 (Adenosine monophosphate kinase); ATP binding / adenylate kinase/ nucleobase, nucleoside, nucleotide kinase/ nucleotide kinase/ phosphotransferase, phosphate group as acceptor
MZ00028344	5			MEMB11 (LOC10028388	MEMB11 (MEMBRIN 11); SNAP receptor
MZ00016528	5			MFB13.2 (LOC100192026)	AtGUS2 (Arabidopsis thaliana glucuronidase 2); beta-glucuronidase		membrane
MZ00018216	5			MHM17.20 (hypothetical protein LOC100274933)
MZ00021769	5			MKK4 (MKK4 - putative MAPKK)	ATMKK5 (ARABIDOPSIS THALIANA MITOGEN-ACTIVATED PROTEIN KINASE KINASE 5); MAP kinase kinase/ kinase
MZ00055506	5			MMN10.3
MZ00036537	5			MNB8.11 (catalytic/ hydrolase)	hydrolase, alpha/beta fold family protein
MZ00017883	5			MNF13.7 (LOC100273149)
MZ00017766	5			MUA2.11 (hypothetical protein LOC100217032	TCH4 (Touch 4); hydrolase, acting on glycosyl bonds / xyloglucan:xyloglucosyl transferase
MZ00013957	5			MWF20.18 (LOC100280583)	lesion inducing protein-related		ER
MZ00023179	5			Os01g0118300 (hypothetical protein LOC100191625)	phosphatidyl serine synthase family protein		membrane
MZ00032234	5			Os01g0239000 (hypothetical LOC542493)	GPRI1 (GBF'S PRO-RICH REGION-INTERACTING FACTOR 1); transcription factor/ transcription regulator
MZ00024937, MZ00046742	5	x		Os01g0702000 (wound responsive protein-like)	wound-responsive protein-related
MZ00016273	5			Os01g0740500 (hypothetical protein LOC100280068)	peptidase M28 family protein
MZ00039770	5			Os01g0749400 (hypothetical protein LOC100272531)	ATTPS7; alpha,alpha-trehalose-phosphate synthase (UDP-forming)/ transferase, transferring glycosyl groups / trehalose-phosphatase
MZ00018518	5			Os01g0819700 (hypothetical protein LOC100384715)
MZ00041733	5			Os01g0878900 (LOC100280732)	catalytic LigB subunit of aromatic ring-opening dioxygenase family
MZ00024003	5			Os01g0917400 (hypothetical protein LOC100194377)	ZFN1 (ZINC FINGER PROTEIN 1); DNA binding / nuclease/ nucleic acid binding	ZFN1 (ZINC FINGER PROTEIN 1); DNA binding / nuclease/ nucleic acid binding	plastid
MZ00019774	5			Os01g0930200 (hypothetical protein LOC100277125)
MZ00032765	5			Os02g0574500 (hypothetical protein LOC100275691)
MZ00041368	5			Os02g0609400 (hypothetical protein LOC100193656)
MZ00025142	5			Os02g0655500 (EREBP-4 like protein		Os02g0655500 (EREBP-4 like protein
MZ00030992	5			Os02g0673700 (hypothetical protein LOC100275168)			plastid
MZ00055824	5			Os02g0684400 (hypothetical protein LOC100193480)
MZ00029845	5			Os02g0720900 (hypothetical protein LOC100273432)
MZ00044288	5			Os02g0763900 (LOC100274441)	FUT8 (FUCOSYLTRANSFERASE 8); galactoside 2-alpha-L-fucosyltransferase
MZ00027276	5			Os02g0796500 (LOC100274010)
MZ00028054	5			Os02g0832500	ATGSL12 (glucan synthase-like 12); 1,3-beta-glucan synthase/ transferase, transferring glycosyl groups
MZ00000722	5			Os03g0105700 (hypothetical protein LOC100279903
MZ00027766	5			Os03g0133400 (hypothetical protein LOC100384051)
MZ00043679	5			Os03g0343900 (ultraviolet-B-repressible protei			plastid
MZ00036778	5			Os03g0351300 (beta-amylase)	BMY3; beta-amylase/ catalytic/ cation binding
MZ00056365	5			Os03g0359000 (hypothetical protein LOC100274107
MZ00033107	5			Os03g0678400 (hypothetical protein LOC100217249)	zinc finger (C3HC4-type RING finger) family protein	zinc finger (C3HC4-type RING finger) family protein
MZ00025858	5			Os03g0745700 (hypothetical protein LOC100194330)	protein kinase, putative		membrane
MZ00016503	5			Os03g0786000 (LOC100283272)	PEX13 (PEROXIN 13); protein binding		plastid
MZ00039866	5			Os03g0808100 (cellulose synthase5	CEV1 (CONSTITUTIVE EXPRESSION OF VSP 1); cellulose synthase/ transferase, transferring glycosyl groups
MZ00012842	5			Os03g0817100 (hypothetical protein LOC10027870	integral membrane protein, putative		membrane
MZ00026441	5			Os03g0820700 (hypothetical protein LOC100192675)	zinc knuckle (CCHC-type) family protein		plastid
MZ00005780	5			Os04g0194500 (hypothetical protein LOC100194100)	ATPase, coupled to transmembrane movement of substances		mitochondrion
MZ00042458	5			Os04g0444700
MZ00019047	5			Os04g0502800 (hypothetical protein LOC100382433)	nodulin family protein		membrane
MZ00017088	5			Os04g0539800 (LOC100273976)	SH3 domain-containing protein 2 (SH3P2)
MZ00032969	5			Os05g0221400 (LOC100217062
MZ00055826	5	x		Os05g0354400 (hypothetical protein LOC100191843)			mitochondrion
MZ00027267	5			Os05g0414100 (hypothetical protein LOC100278816
MZ00027819	5			Os05g0466800 (LOC100216776	NLI interacting factor (NIF) family protein
MZ00025601	5			Os05g0473500 (hypothetical protein LOC100382298)	ATEXO70B1 (exocyst subunit EXO70 family protein B1); protein binding
MZ00029096	5			Os05g0552900 (hypothetical protein LOC100279089)	ATMAP65-6; microtubule binding
MZ00043709	5			Os05g0562200 (LOC100283492)
MZ00028055, MZ00044294	5			Os06g0175400 (hypothetical protein LOC100272474)
MZ00033390	5			Os06g0203600 (LOC100273896)	chalcone isomerase
MZ00026385	5			Os06g0552300 (hypothetical protein LOC100216929	brassinosteroid signalling positive regulator-related
MZ00038113, MZ00044573	5			Os06g0705300 (plant-specific domain TIGR01589 family protein
MZ00041482	5			Os07g0195100 (hypothetical protein LOC100273382	ATRAB8A; GTP binding		plastid
MZ00029281	5	x		Os07g0438700
MZ00038435	5			Os07g0472400 (hypothetical protein LOC100304238)			mitochondrion
MZ00027814	5			Os07g0499900 (hypothetical protein LOC100191637)
MZ00055702	5			Os07g0568900 (hypothetical protein LOC100278273
MZ00023164, MZ00029327	5			Os07g0603800 (LOC100283453)	PTR2 (PEPTIDE TRANSPORTER 2); dipeptide transporter/ high affinity oligopeptide transporter/ nitrate transmembrane transporter/ peptide transporter/ transporter/ tripeptide transporter
MZ00043971, MZ00043972	5			Os07g0661400 (LOC100193790)
MZ00017850, MZ00042273	5			Os07g0687300 (SNF1-related protein kinase regulatory subunit beta-1)	5'-AMP-activated protein kinase beta-2 subunit, putative
MZ00031408	5			Os08g0144000 (LOC100284888	myb family transcription factor	myb family transcription factor
MZ00000619	5			Os08g0266200 (hypothetical protein LOC100278328
MZ00038893	5			Os08g0490000 (hypothetical protein LOC100191909)
MZ00029273	5			Os09g0298500 (LOC100191467
MZ00000512	5			Os09g0344900 (protein binding protein
MZ00016087	5			Os09g0436700
MZ00042008	5			Os09g0451800 (LOC100277680)
MZ00017955	5			Os09g0567900 (LOC100282231)	URH1 (URIDINE-RIBOHYDROLASE 1); adenosine nucleosidase/ hydrolase/ inosine nucleosidase/ uridine nucleosidase
MZ00025380	5			Os10g0158100 (hypothetical protein LOC100381484	KCS10 (3-KETOACYL-COA SYNTHASE 10); acyltransferase/ catalytic/ transferase, transferring acyl groups other than amino-acyl groups
MZ00025606	5			Os10g0479700 (LOC100216974)
MZ00016898	5			Os10g0518300 (hypothetical protein LOC100191974	binding
MZ00026380	5			Os10g0564100 (hypothetical protein LOC100193504)	SOH1 family protein
MZ00032175	5			Os11g0448400 (sigma factor SIG2A)	SIG2 (RNA POLYMERASE SIGMA SUBUNIT 2); DNA binding / DNA-directed RNA polymerase/ sigma factor/ transcription factor	SIG2 (RNA POLYMERASE SIGMA SUBUNIT 2); DNA binding / DNA-directed RNA polymerase/ sigma factor/ transcription factor	plastid
MZ00020771	5			Os11g0601700 (LOC100272601)	basic helix-loop-helix (bHLH) family protein	basic helix-loop-helix (bHLH) family protein	nucleus
MZ00028548	5			Os11g0655800 (lipase)	lipase class 3 family protein		mitochondrion
MZ00017456	5			Os12g0113500 (CBL-interacting protein kinase)	CIPK2 (CBL-INTERACTING PROTEIN KINASE 2); ATP binding / kinase/ protein kinase/ protein serine/threonine kinase
MZ00001323	5			Os12g0160900 (hypothetical protein LOC100274145
MZ00019400	5			Os12g0163800 (hypothetical protein LOC100273787	protein kinase family protein		plastid
MZ00016056	5			Os12g0210200 (LOC100283891)	ATGSTZ2; catalytic/ glutathione transferase
MZ00043791	5			Os12g0570000 (LOC100191442)	PUB13 (PLANT U-BOX 13); ubiquitin-protein ligase
MZ00021052	5			Os12g0581900 (LOC100285491
MZ00026848	5			Os12g0596800 (LOC100281489	zinc ion binding		mitochondrion
MZ00025683	5	x		Os12g0611000 (LOC100194364	zinc finger protein (LSD1)	zinc finger protein (LSD1)
MZ00031222	5			Os12g0611100 (hypothetical protein LOC100304281	protein kinase family protein
MZ00016007	5			OVA5 (LOC100273907)	ATKRS-1 (ARABIDOPSIS THALIANA LYSYL-TRNA SYNTHETASE 1); ATP binding / aminoacyl-tRNA ligase/ lysine-tRNA ligase/ nucleic acid binding / nucleotide binding		plastid
MZ00043443	5			pco061737 (LOC100192079)	lipase, putative
MZ00018665	5			pco062559a (LOC100194226)	THH1 (TOM THREE HOMOLOG 1); virion binding
MZ00014299	5			pco072881 (LOC100273021)	ATF2; enzyme activator
MZ00031877	5			pco082571 (LOC100281922	calcium-binding EF hand family protein
MZ00019058	5			pco089012 (LOC100170234	SHS1 (SODIUM HYPERSENSITIVE 1); binding / nucleotide transmembrane transporter/ transporter
MZ00014438	5			pco104496 (LOC100194284	UBC25 (UBIQUITIN-CONJUGATING ENZYME 25); small conjugating protein ligase
MZ00026569	5			pco106166 (LOC100278846
MZ0003464, MZ00016277, MZ00041906	5	x		pco108299 (LOC10021657	binding
MZ00041906	5			pco119647 (LOC100283330	vacuolar ATP synthase subunit D (VATD) / V-ATPase D subunit / vacuolar proton pump D subunit (VATPD
MZ00041257, MZ00041259	5			pco122604 (LOC100273816)
MZ00021076	5			pco123983 (LOC100272928
MZ00044370, MZ00028884	5			pco132838 (LOC100273572	zinc finger (C3HC4-type RING finger) family protein
MZ00026830	5			pco142893 (LOC100281623)	SP1L1 (SPIRAL1-LIKE1)
MZ00024911	5			pco148543(450) (LOC100194018)	universal stress protein (USP) family protein
MZ00020070	5			PGM (phosphoglucomutase 1)	phosphoglucomutase, cytoplasmic, putative / glucose phosphomutase, putative
MZ00005649	5			PIP5K1 (hypothetical protein LOC100216938)	ATPIP5K1 (PHOSPHATIDYLINOSITOL-4-PHOSPHATE 5-KINASE 1); 1-phosphatidylinositol-4-phosphate 5-kinase/ actin filament binding / actin monomer binding / phosphatidylinositol phosphate kinase
MZ00014962	5			pls1 (phospholipid synthesis1) 1-acyl-sn-glycerol-3-phosphate acyltransferase PLS1	LPAT2; 1-acylglycerol-3-phosphate O-acyltransferase
MZ00015618	5			POK	POK (POKY POLLEN TUBE)		golgi
MZ00014111	5		x	PP (PP protein)	WIN2 (HOPW1-1-INTERACTING 2); protein serine/threonine phosphatase
MZ00013412	5			PSBR (photosystem II3)	PSBR (photosystem II subunit R)
MZ00024588	5			psiP (pollen signalling protein with adenylyl cyclase activity
MZ00043242	5			PSP (LOC100285190)	PSP (3-PHOSPHOSERINE PHOSPHATASE); phosphoserine phosphatase
MZ00041421	5			RABE1a (hypothetical protein LOC100192989	ATRAB8A; GTP binding
MZ00016582	5			RCY1 (LOC100283163	RCY1 (ARGININE-RICH CYCLIN 1); cyclin-dependent protein kinase regulator
MZ00028445	5			SAC1 (LOC100279320)	ATSAC1 (suppressor of actin 1); phosphatidylinositol-4,5-bisphosphate 5-phosphatase
MZ00019217	5			sbp7 (SBP-domain protein 7)	SPL9 (SQUAMOSA PROMOTER BINDING PROTEIN-LIKE 9); transcription factor	SPL9 (SQUAMOSA PROMOTER BINDING PROTEIN-LIKE 9); transcription factor
MZ00028431	5			SCPL51 (hypothetical protein LOC100280301	SCPL51 (SERINE CARBOXYPEPTIDASE-LIKE 51); serine-type carboxypeptidase
MZ00016900	5			SCY1 (Chloroplast SecY-1)	SCY1 (SecY Homolog 1); P-P-bond-hydrolysis-driven protein transmembrane transporter		plastid
MZ00000875	5			si614028h05a (LOC100281751)	lipid-binding serum glycoprotein family protein
MZ00031510, MZ00042557	5			si687013d08 (LOC100281166)	EBF1 (EIN3-BINDING F BOX PROTEIN 1); protein binding / ubiquitin-protein ligase
MZ00044559	5			si687076d05 (LOC100277201	RAB GTPase activator
MZ00027662	5			SIGF (sigma-like factor6)	SIGF (RNA POLYMERASE SIGMA-SUBUNIT F); DNA binding / DNA-directed RNA polymerase/ sigma factor/ transcription factor	SIGF (RNA POLYMERASE SIGMA-SUBUNIT F); DNA binding / DNA-directed RNA polymerase/ sigma factor/ transcription factor
MZ00013365	5			SP1L2 (LOC100283729	SP1L1 (SPIRAL1-LIKE1)
MZ00018433, MZ00048172	5			T10F20.16 (hypothetical protein LOC100280199	HT1 (high leaf temperature 1); kinase/ protein serine/threonine/tyrosine kinase
MZ00042787	5			T15C9.2 (LOC100280472)	ATB' ALPHA; protein phosphatase type 2A regulator
MZ00024352	5			T15N1.130 (LOC100191610)	GSK1 (GSK3/SHAGGY-LIKE PROTEIN KINASE 1); glycogen synthase kinase 3/ kinase
MZ00025025	5			T16F16.26 (PHD finger protein)	AL7 (ALFIN-LIKE 7); DNA binding / methylated histone residue binding
MZ00043199	5			T19G15.70 (LOC100193117)	ChaC-like family protein		membrane
MZ00016500	5			T1B3.11 (hypothetical protein LOC100276927)
MZ00029768	5			T1G16.60 (LOC100193372)
MZ00039159	5			T21J18.1 (hypothetical protein LOC100192602)	nodulin MtN3 family protein		plastid
MZ00041772	5			T22A6.270 (LOC100286346)	transcription initiation factor IIA gamma chain / TFIIA-gamma (TFIIA-S)	transcription initiation factor IIA gamma chain / TFIIA-gamma (TFIIA-S)
MZ00004458	5			T24D18.8 (hypothetical protein LOC100275158)	NDF1 (NDH-DEPENDENT CYCLIC ELECTRON FLOW 1)		plastid
MZ00039791	5			T24G5.110 (ATP binding protein)	DEAD/DEAH box helicase, putative		plastid
MZ00027546	5			T25B24.15 (kinase interacting kinase1)	B120; ATP binding / protein kinase/ protein serine/threonine kinase/ sugar binding		plastid
MZ00030106	5			T2L5.6 (heparanase-like protein 3)	AtGUS3 (Arabidopsis thaliana glucuronidase 3); beta-glucuronidase		membrane
MZ00028570	5			T2N18.8
MZ00015130	5			T30N20.50 (LOC100381640)
MZ00055287	5			T32F6.3 (hypothetical protein LOC100279377	calcium-binding EF hand family protein
MZ00026877	5			T6H22.12 (LOC100277416)
MZ00013783	5			T6P5.12 (LOC100279250)	subtilase family protein		membrane
MZ00022706	5			T7H20.10 (LOC100283780	zinc finger (C3HC4-type RING finger) family protein		plastid
MZ00014807	5			T7N9.14 (hypothetical protein LOC100191680)	proton-dependent oligopeptide transport (POT) family protein		membrane
MZ00018730	5			T8F5.10 (hypothetical protein LOC100191828	CBS domain-containing protein
MZ00017972	5			T8F5.5 (heat shock protein binding protein	heat shock protein binding
MZ00024104, MZ00019772	5			T8I13.8 (LOC100279270)	long-chain-fatty-acid--CoA ligase family protein / long-chain acyl-CoA synthetase family protein
MZ00026166	5			T9J22.14 (hypothetical protein LOC100277594)
MZ00030178	5			TED3 (hypothetical protein LOC100193229	TED3 (REVERSAL OF THE DET PHENOTYPE 3); protein binding / zinc ion binding		ER
MZ00035360	5			TET7 (LOC100282601)	TET3 (TETRASPANIN3)		membrane
MZ00014772	5			TIDP2779 (LOC100384718
MZ00026136	5			TIDP2894 (LOC100284429)	basic helix-loop-helix (bHLH) family protein
MZ00035046	5			TIDP2933 (LOC100193571)	SP1L1 (SPIRAL1-LIKE1)
MZ00016022	5			TIDP3082 (LOC100276279
MZ00015815	5			TIDP3585 (LOC100284017)	yippee family protein
MZ00043868	5			TIDP3667 (LOC100273224	nucleoside phosphatase family protein / GDA1/CD39 family protein
MZ00014475	5			TON1A (LOC100274116)	TON1A (TONNEAU 1)
MZ00041561	5			TON1B (hypothetical protein LOC10019395	TON1A (TONNEAU 1)
MZ00038883, MZ00041130	5			UBC14 (LOC100272466)	UBC13 (ubiquitin-conjugating enzyme 13); ubiquitin-protein ligase
MZ00041314	5			UBC30 (hypothetical protein LOC100192684)	UBC11 (UBIQUITIN-CONJUGATING ENZYME 11); ubiquitin-protein ligase
MZ00018912	5			umc1113 (LOC100384204)	protein binding / zinc ion binding
MZ00022599	5			umc2077 (LOC100191926)	RHF2A (RING-H2 GROUP F2A); protein binding / zinc ion binding
MZ00027002	5			vef101a (VEF family protein)	EMF2 (EMBRYONIC FLOWER 2); DNA binding / transcription factor	EMF2 (EMBRYONIC FLOWER 2); DNA binding / transcription factor
MZ00019521	5			VND7 (hypothetical protein LOC100192643)	VND7 (VASCULAR RELATED NAC-DOMAIN PROTEIN 7); transcription activator/ transcription factor/ transcription regulator	VND7 (VASCULAR RELATED NAC-DOMAIN PROTEIN 7); transcription activator/ transcription factor/ transcription regulator	nucleus
MZ00018080	5			WNK1 (LOC100273552	WNK9; kinase/ protein kinase		plastid
MZ00056320	5			ZemaCp064
MZ00013254	5			ZIGA4 (LOC100279721)	ZIGA4 (ARF GAP-like zinc finger-containing protein ZiGA4); ARF GTPase activator/ DNA binding / zinc ion binding	ZIGA4 (ARF GAP-like zinc finger-containing protein ZiGA4); ARF GTPase activator/ DNA binding / zinc ion binding
dawn
Maizearray ID				gene annotation (Zea mays)	gene annotation (Arabidopsis thaliana)	transcription factor	cell component
MZ00026717	6	x		AT2G25737 (LOC100279247			membrane
MZ00028204	6			DL4905C	C-terminal processing protease, putative		plastid
MZ00040435	6	x		LOC100273071 (hypothetical protein LOC100273071)	pathogenesis-related thaumatin family protein
MZ00050509	6			LOC100275077 (hypothetical protein LOC100275077)
MZ00029410, MZ00044410	6			LOC100279638 (hypothetical protein LOC100279638)	glycerol-3-phosphate transporter, putative / glycerol 3-phosphate permease, putative
MZ00032964	6		x	MNJ8.4 (LOC100280442)	myb family transcription factor	myb family transcription factor
MZ00023293	6			Os05g0589400 (hypothetical protein LOC100194332	DNA-binding family protein	DNA-binding family protein
MZ00031326	6		x	Os07g0472300 (LOC100275416)
MZ00000664	6			si605030c12(314) (LOC100277663)
MZ00029798, MZ00042442, MZ00042443	7			cl25517_1b (LOC100273851)	CIPK9 (CBL-INTERACTING PROTEIN KINASE 9); ATP binding / kinase/ protein kinase/ protein serine/threonine kinase
MZ00027606	7			F13H10.20 (rhythmically expressed protein)	haloacid dehalogenase-like hydrolase family protein
MZ00006013	7	x		F14G9.16 (hypothetical protein LOC100192913)
MZ00019770	7	x		IDP335 (LOC100217229)	vesicle-associated membrane family protein / VAMP family protein
MZ00020536	7		x	LHY (LHY protein)	LHY (LATE ELONGATED HYPOCOTYL); LATE ELONGATED HYPOCOTYL 1	LHY (LHY protein)
MZ00029892	7			LOC100192101 (hypothetical protein LOC100192101)	nodulin MtN21 family protein
MZ00004101	7	x	x	MNJ8.4 (LOC100280442)	myb family transcription factor	myb family transcription factor
MZ00029138	7	x		Os01g0243000 (triacylglycerol lipase)
MZ00005509	7			Os01g0603300 (hypothetical protein LOC100381732)	myb family transcription factor	myb family transcription factor
MZ00014277	7			Os02g0514500 (hypothetical protein LOC100191201)	SRG3 (senescence-related gene 3); glycerophosphodiester phosphodiesterase/ phosphoric diester hydrolase
MZ00042149	7	x		Os06g0240800 (LOC100272885)
MZ00027556, MZ00051093	7	x		T17A11.9 (LOC100216884)	glycerol-3-phosphate transporter, putative / glycerol 3-phosphate permease, putative
MZ0001288	8			ALS3 (LOC100280464)	ALS3 (ALUMINUM SENSITIVE 3)		membrne
MZ00005607, MZ00044349	8			AT2G37850 (hypothetical protein LOC100382597)	protein kinase family protein
MZ00005083	8			AT3G11760			mitochondrion
MZ00024302	8			AT3G15450 (LOC100281995)
MZ00013611	8			AT3G15680 (LOC100194201)	zinc finger (Ran-binding) family protein	zinc finger (Ran-binding) family protein
MZ00019446	8			AT3G48540 (deoxycytidylate deaminase)	cytidine/deoxycytidylate deaminase family protein		membrane
MZ00037300	8			AT3G56310 (hypothetical protein LOC100191764)	alpha-galactosidase, putative / melibiase, putative / alpha-D-galactoside galactohydrolase, putative
MZ00028709	8	x		cl34259_2 (LOC100273567)
MZ00004096	8			CNR02 (cell number regulator 2)
MZ00016304	8			F19I3.12 (hypothetical protein LOC100194241)	CTP synthase, putative / UTP--ammonia ligase, putative		membrane
MZ00050461	8			F23H11.28 (metalloendoproteinase 1)	matrixin family protein		membrane
MZ00026975	8			F7H19.260 (hypothetical protein LOC1003830)	rhomboid family protein
MZ00024571	8			IAA16 (IAA30 - auxin-responsive Aux/IAA family member)	IAA16 (indoleacetic acid-induced protein 16); transcription factor	IAA16 (indoleacetic acid-induced protein 16); transcription factor	plastid
MZ00034280, MZ00043835	8	x		IBP1 (initiator binding protein)	initiator binding protein
MZ00025725, MZ00035156, MZ00043836	8	x		IBP2 (initiator-binding protein2)	initiator-binding protein
MZ00030299	8			LOC100101529 (LOC100101529)	HWS (HAWAIIAN SKIRT); ubiquitin-protein ligase
MZ00001057	8			LOC100217284 (hypothetical protein LOC100217284)
MZ00027084	8			LOC100273156 (hypothetical protein LOC100273156)	BETA-OHASE 1 (BETA-HYDROXYLASE 1); carotene beta-ring hydroxylase
MZ00025184	8			LOC100274590 (hypothetical protein LOC100274590)
MZ00034285	8			LOC100279845 (hypothetical protein LOC100279845)	1-phosphatidylinositol phosphodiesterase-related
MZ00031346	8			LOC100281574 (pepsin A)
MZ00029986	8			LOC100382199 (hypothetical protein LOC100382199)	ATGLX1 (GLYOXALASE I HOMOLOG); lactoylglutathione lyase/ metal ion binding
MZ00042570	8			LOC100382238 (hypothetical protein LOC100382238
MZ00018121	8			LOC100383033 (hypothetical protein LOC100383033)
MZ00016666	8			LOC100383744 (hypothetical protein LOC100383744)
MZ00032119	8			LOC541745 (R2R3MYB-domain protein		LOC541745 (R2R3MYB-domain protein
MZ00005313	8			Os01g0882400 (hypothetical protein LOC100278173)			membrane
MZ00020512	8			Os04g0440300 (hypothetical protein LOC100193729)
MZ00019859	8			Os05g0110100 (hypothetical protein LOC100277183)			plastid
MZ00025243, MZ00043708	8			Os05g0562200 (LOC100283492)
MZ00031549	8			Os10g0479800 (hypothetical protein LOC100192558)	pleckstrin homology (PH) domain-containing protein / lipid-binding START domain-containing protein
MZ00013559	8			pco070432b (LOC100193816)
MZ00029777	8			PLDD (hypothetical protein LOC100217111)	ATPLDDELTA; phospholipase D
MZ00040834	8			PSAN (photosystem I reaction center subunit N)	PSAN (photosystem I reaction center subunit PSI-N
MZ00001109	8			T24I21.16 (hypothetical protein LOC100384022)	protein kinase family protein		membrane
MZ00025614	8	x		umc1751 (LOC100275074)
MZ00034412	8			XTR3 (xyloglucan endotransglycosylase homolog1	XTH19 (XYLOGLUCAN ENDOTRANSGLUCOSYLASE/HYDROLASE 19); hydrolase, acting on glycosyl bonds / hydrolase, hydrolyzing O-glycosyl compounds / xyloglucan:xyloglucosyl transferase
MZ00026699	9			ACA8 (LOC100383276)	calcium-transporting ATPase/ calmodulin binding
MZ00041828	9			ALDH11A3 (glyceraldehyde-3-phosphate deHaseN1)	ALDH11A3 (Aldehyde dehydrogenase 11A3);
MZ00022590	9			ANAC058 (NAC domain-containing protein 21/22)	ANAC058 (Arabidopsis NAC domain containing protein 58);	ANAC058 (NAC domain-containing protein 21/22)
MZ00021166	9			AT2G33205 (hypothetical protein LOC100273927)			plastid
MZ00048553	9			AT2G37850 (hypothetical protein LOC100382597)	protein kinase family protein
MZ00028713	9			AT3G12790 (hypothetical protein LOC100194355)	short-chain dehydrogenase/reductase (SDR) family protein
MZ00042669	9			AT3G14240 (hypothetical protein LOC100304374)	subtilase family protein		membrane
MZ00019393	9			AT3G17470 (hypothetical protein LOC100273011)	RelA/SpoT domain-containing protein / calcium-binding EF-hand family protein
MZ00004516	9			AT3G25290 (membrane protein)	auxin-responsive protein, putative		membrane
MZ00021127	9			AT3G27290 (LOC100193239)
MZ00036716	9			AT3G27340 (LOC100278318)
MZ00030489	9			ATNAP3 (phosphate import ATP-binding protein pstB 1)	ATNAP3 (Arabidopsis thaliana non-intrinsic ABC protein 3)		plastid
MZ00042769	9			ATPAP21/PAP21	PAP21 (PURPLE ACID PHOSPHATASE 21); acid phosphatase/ protein serine/threonine phosphatase
MZ00039154	9			AY107844 (LOC100127007)	CP5
MZ00005539	9			CHUP1	CHUP1 (CHLOROPLAST UNUSUAL POSITIONING 1)
MZ00029529, MZ00036128	9			cl30502_1(105) (LOC100279936)	BTB/POZ domain containing protein
MZ00046829	9			F13K3.9 (gibberellin 20 oxidase 2)	oxidoreductase, 2OG-Fe(II) oxygenase family protein
MZ00056373	9			F17K2.20 (LOC100191712)	calcineurin B subunit-related
MZ00018778	9			F4I10.40 (LOC100272247)	coclaurine N-methyltransferase, putative
MZ00018530, MZ00042509	9	X		F4P9.4 (hypothetical protein LOC100191145)	thioredoxin family protein
MZ00029596	9			F6P23.15 (NIN-like protein 1)	RWP-RK domain-containing protein
MZ00043648	9			FAB1 (LOC100193451)	fatty-acid synthase		plastid
MZ00015801	9	x		GLX2-1 (LOC1002166)	hydroxyacylglutathione hydrolase
MZ00023968	9			gpm375a (LOC100191672)	SSI2; acyl-[acyl-carrier-protein] desaturase/ stearoyl-CoA 9-desaturase
MZ00026883	9			K18J17.8 (guanylyl cyclase-like protein)	guanylyl cyclase-related (GC1
MZ00004128	9			K1F13.28 (hypothetical protein LOC10027391)
MZ00040961	9			K5J14.7 (beta glucosidase1)	glycosyl hydrolase family 1 protein		membrane
MZ00048367	9			kip (knotted interacting protein1)	BLH11 (BEL1-LIKE HOMEODOMAIN 11); transcription factor	BLH11 (BEL1-LIKE HOMEODOMAIN 11); transcription factor
MZ00038236	9			LOC100125637 (zein) zein-alpha ZG99 precursor
MZ00038657	9	x		LOC100191668 (hypothetical protein LOC100191668)	ATRBL2 (Arabidopsis thaliana Rhomboid-like 2); serine-type endopeptidase
MZ00032945	9			LOC100194196 (hypothetical protein LOC100194196)	transferase, transferring glycosyl groups
MZ00018916	9			LOC100274097 (hypothetical protein LOC100274097)	URH1 (URIDINE-RIBOHYDROLASE 1); adenosine nucleosidase/ hydrolase/ inosine nucleosidase/ uridine nucleosidase
MZ00043481	9			LOC100274515 (hypothetical protein LOC100274515)	fructose-bisphosphate aldolase, putative
MZ00025941	9			LOC100274745 (hypothetical protein LOC100274745)
MZ00018185	9			LOC100276915 (hypothetical protein LOC100276915)
MZ00035264	9	x		LOC100277166 (hypothetical protein LOC100277166)
MZ00021966	9			LOC100277302 (hypothetical protein LOC100277302)
MZ00024932, MZ00043264	9			LOC100277427 (hypothetical protein LOC100277427)
MZ00028335	9	x		LOC100277638 (hypothetical protein LOC100277638
MZ00037275	9			LOC100277838 (hypothetical protein LOC100277838
MZ00022472	9			LOC100278335 (hypothetical protein LOC100278335)
MZ00032766	9			LOC100278778 (hypothetical protein LOC100278778)
MZ00026788	9			LOC100279486 (hypothetical protein LOC100279486)
MZ00032599	9			LOC100279643 (hypothetical protein LOC100279643	auxin-responsive family protein
MZ00012700	9			LOC100285421 (wiscott-Aldrich syndrome, C-terminal)
MZ00017005	9			LOC100285439 (phosphatidylinositol 3- and 4-kinase family protein	phosphatidylinositol 3- and 4-kinase family protein
MZ00022778	9			LOC100286352 (oleosin Bn-V)	glycine-rich protein / oleosin
MZ00006939	9			LOC100381763 (hypothetical protein LOC100381763
MZ00043902	9			LOC100381894 (hypothetical protein LOC100381894)	F-box family protein
MZ00020150	9			LOC100382517 (hypothetical protein LOC100382517)
MZ00015511	9			LOC100384846 (hypothetical protein LOC100384846)	SCO1 (SNOWY COTYLEDON 1); ATP binding / translation elongation factor/ translation factor, nucleic acid binding
MZ00056920	9			MRA19.5 (hypothetical protein LOC100192953)	SBT5.4; identical protein binding / serine-type endopeptidase		membrane
MZ00028792	9			MTO2 (threonine synthase)	threonine synthase
MZ00028112	9			MWD9.26 (hypothetical protein LOC100272635)	esterase/lipase/thioesterase family protein		membrane
MZ00031840	9			Os01g0771400 (hypothetical protein LOC100383827)	UBP13 (UBIQUITIN-SPECIFIC PROTEASE 13); ubiquitin thiolesterase/ ubiquitin-specific protease
MZ00033111	9			Os01g0855400 (hypothetical protein LOC100381651)	transcriptional activator Myb (Mus musculus)	transcriptional activator Myb (Mus musculus)
MZ00027360	9			Os02g0101400 (hypothetical protein LOC100192615)	family II extracellular lipase 3 (EXL3)
MZ00027450	9			Os02g0790500 (LOC100281927	ATTPS9; transferase, transferring glycosyl groups / trehalose-phosphatase
MZ00034228	9			Os03g0106700 (hypothetical protein LOC100382762)	ATEXPB2 (ARABIDOPSIS THALIANA EXPANSIN B2)		plastid
MZ00005917	9			Os03g0185700 (hypothetical protein LOC100383097)
MZ00038561	9			Os03g0404800 (hypothetical protein LOC100383338)	AT3BETAHSD/D1 (3BETA-HYDROXYSTEROID-DEHYDROGENASE/DECARBOXYLASE ISOFORM 1); 3-beta-hydroxy-delta5-steroid dehydrogenase/ sterol-4-alpha-carboxylate 3-dehydrogenase (decarboxylating)
MZ00029891	9			Os03g0731100 (hypothetical protein LOC100275243)			mitochondrion
MZ00018154	9			Os05g0163400 (hypothetical protein LOC100381884)
MZ00018365	9			Os05g0519200 (protein kinase)	protein kinase family protein
MZ00052027	9			Os06g0552900 (LOC100127539)	TSF (TWIN SISTER OF FT); phosphatidylethanolamine binding
MZ00036507	9			Os06g0660800 (hypothetical protein LOC100381650)
MZ00026870	9			Os06g0662200 (light-inducible protein CPRF-2)	BZIP9 (BASIC LEUCINE ZIPPER 9); DNA binding / protein heterodimerization/ transcription factor	Os06g0662200 (light-inducible protein CPRF-2)
MZ00019399	9			Os07g0185700
MZ00016152	9			Os07g0408500 (rac GTPase activating protein	rac GTPase activating protein, putative
MZ00020243	9			Os10g0411500 (LOC100383227)	calmodulin-binding family protein
MZ00030089, MZ00032745	9	x		Os11g0109000 (hypothetical protein LOC100273364	protein phosphatase 2C family protein / PP2C family protein
MZ00003746	9			Os11g0601700 (LOC100272601)	basic helix-loop-helix (bHLH) family protein	basic helix-loop-helix (bHLH) family protein
MZ00026017	9			pco074618 (LOC100194124	hypoxia-responsive family protein
MZ00024680	9			pco110259 (LOC100284611)
MZ00042098	9			pco142939 (LOC100273563)	leucine-rich repeat family protein
MZ00044543	9	x		pco143563 (LOC100193102)	protein kinase family prote
MZ00016632	9			PDH-E1 BETA (LOC100282233)	pyruvate dehydrogenase (acetyl-transferring)		plastid
MZ00056467	9			PHT2;1 (hypothetical protein LOC100382112)	PHT2;1 (phosphate transporter 2;1)		plastid
MZ00044333	9			PIP1B (plasma membrane intrinsic protein1)	PIP1;5 (PLASMA MEMBRANE INTRINSIC PROTEIN 1;5); water channel		membrane
MZ00015137	9			Pti1 (Pti1 protein)	serine/threonine protein kinase, putative
MZ00018326	9	x		SCL21 (LOC100281447	SCL13 (Scarecrow-like 13); transcription factor	SCL13 (Scarecrow-like 13); transcription factor
MZ00031288	9			si606029c09(535) (LOC100194169	YDA (YODA); ATP binding / kinase/ protein kinase/ protein serine/threonine kinase
MZ00019235	9			SKS14 (pollen-specific protein NTP303)	copper ion binding / oxidoreductase
MZ00019177	9			STP1 (sugar carrier protein C)	carbohydrate transporter/ sugar porter		membrane
MZ00017800	9			T16L4.40 (LOC100281893	2,3-diketo-5-methylthio-1-phosphopentane phosphatase family
MZ00049705	9			T1F15.2 (hypothetical protein LOC100383159)	leucine-rich repeat family protein		membrane
MZ00019915	9			T1K7.7 (hypothetical protein LOC100192939)	glycosyl hydrolase family 1 protein		membrane
MZ00035784	9			T22A6.270 (LOC100286346)	transcription initiation factor IIA gamma chain / TFIIA-gamma (TFIIA-S)	transcription initiation factor IIA gamma chain / TFIIA-gamma (TFIIA-S)	nucleus
MZ00039889	9		x	T22J18.8 (hypothetical protein LOC100276065	membrane
MZ00044418	9			T25B24.15 (kinase interacting kinase1)	S-locus protein kinase, putative		membrane
MZ00019861	9			T25K17.6 (LOC100191354)	mitochondrionondrial substrate carrier family protein		mitochondrion
MZ00036755	9			T29J13.180 (LOC100274318)	dicarboxylate/tricarboxylate carrier (DTC)		mitochondrion
MZ00028216	9	x		T30A10.110 (LOC100282476	DNAJ heat shock N-terminal domain-containing protein
MZ00015444	9	x		T4C15.7 (LOC100217228)			plastid
MZ00029916	9			TIDP3623 (LOC100279674
MZ00037278	9	x		TIP2 (tonoplast intrinsic protein2)	AtTIP2;3; ammonia transporter/ methylammonium transmembrane transporter/ water channel
MZ00044138	9			umc1994 (LOC100279678)
MZ00018825	9			umc2501 (LOC100272853)
MZ00027771	9			VLN2
MZ00031651	9			wusl1032 (LOC542242)	33 kDa secretory protein-related
MZ00018534	10			F7F22.5
MZ00027408	10			GSTF8 (glutathione S-transferase GST 15)			plastid
MZ00001133	10		x	LHY (LHY protein)	LHY (LATE ELONGATED HYPOCOTYL); DNA binding / transcription factor	LHY (LHY protein)
MZ00048364	10			Os03g0351300 (beta-amylase)	BMY3; beta-amylase/ catalytic/ cation binding
MZ00035078	10			Os04g0644400 (hypothetical protein LOC100273286)			plastid
MZ00029694	10			pco141808(267) (LOC100280267)	LTL1 (LI-TOLERANT LIPASE 1); carboxylesterase/ hydrolase, acting on ester bonds
MZ00029730	10			T9A14.6 (thaumatin-like protein 1)	thaumatin, putative		membrane
MZ00019773, MZ00019780, MZ00037251	11			AO (hypothetical protein LOC100279867	AO (L-ASPARTATE OXIDASE); L-aspartate oxidase/ electron carrier/ oxidoreductase
MZ00027376	11			AT1G13635 (LOC100282754	methyladenine glycosylase family protein
MZ0001586, MZ00019689	11			AT3G24180 (LOC100279895)	catalytic/ glucosylceramidase
MZ00024548, MZ00024550, MZ00024551, MZ00039810, MZ00043497	11	x		AT3G46500 (hypothetical protein LOC100192575)	oxidoreductase, 2OG-Fe(II) oxygenase family protein
MZ00016263	11			AT3G55140 (LOC100283618)	pectate lyase family protein
MZ00015719	11	x		AT3G55760			plastid
MZ00035469	11			AT59 (LOC100284055)	pectate lyase family protein
MZ00049823	11			CHR5	CHR5 (chromatin remodeling 5); ATP binding / DNA binding / chromatin binding / helicase/ nucleic acid binding	CHR5 (chromatin remodeling 5); ATP binding / DNA binding / chromatin binding / helicase/ nucleic acid binding	nucleus
MZ00016749	11			CLF (enhancer of zeste1)	CLF (CURLY LEAF); transcription factor	CLF (CURLY LEAF); transcription factor
MZ00022088	11			CRK (LOC100280531)	CRK (CDPK-related kinase); ATP binding / calcium ion binding / calcium-dependent protein serine/threonine phosphatase/ kinase/ protein kinase/ protein serine/threonine kinase
MZ00032999	11	x		csu868(trp) (LOC100273163	tryptophan synthase, alpha subunit, putative
MZ00055614	11			F3L17.8 (LOC100275558)			membrane
MZ00018533	11			F7F22.5
MZ0004608	11			GAUT7/LGT7 (transferase, transferring glycosyl groups)	GAUT7 (GALACTURONOSYLTRANSFERASE 7); polygalacturonate 4-alpha-galacturonosyltransferase/ transferase, transferring glycosyl groups		mitochondrion
MZ00032037	11			IDP875 (LOC100274900)	transcription factor	transcription factor
MZ00038246	11			LOC100127495 (z1A alpha zein protein)
MZ00018698	11			LOC100272231 (hypothetical protein LOC100272231)	KCS17 (3-KETOACYL-COA SYNTHASE 17); acyltransferase/ catalytic/ transferase, transferring acyl groups other than amino-acyl groups
MZ00001113	11			LOC100280756 (IAA16 - auxin-responsive Aux/IAA family member)
MZ00030797	11			LOC100284251 (flavonol 4-sulfotransferase)	SOT18 (DESULFO-GLUCOSINOLATE SULFOTRANSFERASE 18); 3-methylthiopropyl-desulfoglucosinolate sulfotransferase/ 4-methylthiobutyl-desulfoglucosinolate sulfotransferase/ 5-methylthiopentyl-desulfoglucosinolate sulfotransferase/ 7-methylthioheptyl-desulfo
MZ00037251	11			LOC100284364 (acid phosphatase/vanadium-dependent haloperoxidase related)
MZ00032200	11			LOC100382633 (hypothetical protein LOC100382633)
MZ00021464	11			MAE1.1 (hypothetical protein LOC100191504)	2-phosphoglycerate kinase-related
MZ00022449	11			MRB17.7 (hypothetical protein LOC100279909)	BGLU41 (BETA GLUCOSIDASE 41); catalytic/ cation binding / hydrolase, hydrolyzing O-glycosyl compounds		membrane
MZ00020210	11			Os01g0672800 (hypothetical protein LOC100275604)
MZ00028444	11			Os01g0850000 (hypothetical protein LOC100191633)
MZ00039556	11			Os04g0620600 (nitrate-induced NOI protein)
MZ00037113	11			Os05g0104600 (polygalacturonase inhibitor 1)
MZ00019894	11	x		Os05g0189300	acid phosphatase, putative
MZ00022783	11			Os06g0270200 (LOC100279541)	KT2 (POTASSIUM TRANSPORTER 2); potassium ion transmembrane transporter
MZ00037439	11			Os08g0101800 (LOC100283078)
MZ00025134	11			Os09g0267400 (LOC100216786)
MZ00031009, MZ00055437	11			Os10g0479800 (hypothetical protein LOC100192558)	pleckstrin homology (PH) domain-containing protein / lipid-binding START domain-containing protein
MZ00055437	11			Os10g0479800 (hypothetical protein LOC100192558)	pleckstrin homology (PH) domain-containing protein / lipid-binding START domain-containing protein
MZ00007268	11			sfp1 (sulfate permease1)	SULTR1;3; sulfate transmembrane transporter
MZ00023421	11	x		T12C22.19 (hypothetical protein LOC100277877)	PRL (PROLIFERA); ATP binding / DNA binding / DNA-dependent ATPase/ nucleoside-triphosphatase/ nucleotide binding		plastid
MZ00027087	11			T15M6.12 (LOC100286001)	bZIP family transcription factor	bZIP family transcription factor	nucleus
MZ00030979	11			T16O11.11	binding / protein transporter
MZ00000746	11			T24P13.14 (LOC100191692)			plastid
MZ00034365	11			TIP2 (tonoplast intrinsic protein2) aquaporin TIP2-1	AtTIP2;3; ammonia transporter/ methylammonium transmembrane transporter/ water channel
MZ00024397	12			ACT7 (LOC100283878)	ACT7 (ACTIN 7); structural constituent of cytoskeleton
MZ00015231	12	x		ALDH11A3 (glyceraldehyde-3-phosphate deHaseN1	ALDH11A3; 3-chloroallyl aldehyde dehydrogenase/ glyceraldehyde-3-phosphate dehydrogenase (NADP+)
MZ00034260	12	x		APRL2 (adenosine 5'-phosphosulfate reductase-like2)	APR3 (APS REDUCTASE 3); adenylyl-sulfate reductase
MZ00025185	12	x		AT2G32570 (cyclin-like F-box	F-box family protein		mitochondrion
MZ00017575	12			AT3G19970 (hypothetical protein LOC100279593)
MZ00005531	12			AT3G20240 (protein brittle-1)	mitochondrionondrial substrate carrier family protein		mitochondrion
MZ00023992	12			AT3G24190 (ABC(yeast) homolog1)	ABC1 family protein
MZ00013774	12			AT3G29360 (LOC100279549)	UDP-glucose 6-dehydrogenase, putative		membrane
MZ00001362	12			AT3G51150 (hypothetical protein LOC100304245)
MZ00025711, MZ00052099	12	x		AT3G51680 (tassel seed2)	short-chain dehydrogenase/reductase (SDR) family protein
MZ00028139	12	x		AT3G52870 (hypothetical protein LOC100383398)	calmodulin-binding family protein
MZ00018688	12	x		AT5G54130 (LOC100192933	calcium-binding EF hand family protein		nucleus
MZ00040420	12			ATCSLE1 (CSLE6 - cellulose synthase-like family E)	ATCSLE1; cellulose synthase/ transferase, transferring glycosyl groups
MZ00026567	12	x		ATFRO6/FRO6 (ferric reductase-like transmembrane component)	ATFRO7 (FERRIC REDUCTION OXIDASE 7); ferric-chelate reductase/ oxidoreductase
MZ00017901	12			AT-HSFB4 (LOC100277279)	AT-HSFB4; DNA binding / transcription factor	AT-HSFB4; DNA binding / transcription factor
MZ00018148	12			ATMLO1/MLO1 (barley mlo defense gene homolog8	MLO1; calmodulin binding
MZ00020701	12			cl18267_1 (LOC100191662)
MZ00048545	12			EID1 (hypothetical protein LOC100276883	EID1 (EMPFINDLICHER IM DUNKELROTEN LICHT 1); ubiquitin-protein ligase		nucleus
MZ00051136	12			F13H10.20 (rhythmically expressed protein)	haloacid dehalogenase-like hydrolase family protein		mitochondrion
MZ00027081	12			F14O23.19	ABC1 family protein
MZ00036551	12			F19K23.17 (hypothetical protein LOC100277758)
MZ00029054	12			F1C9.16	DEAD/DEAH box helicase, putative
MZ00049747	12			F1N13.150 (3-oxo-5-alpha-steroid 4-dehydrogenase 2)	3-oxo-5-alpha-steroid 4-dehydrogenase family protein / steroid 5-alpha-reductase family protein		membrane
MZ00034242	12			F20H23.18	ankyrin repeat family protein / regulator of chromosome condensation (RCC1) family protein		plastid
MZ00043716	12			F28L1.5 (LOC732725)	dual specificity protein phosphatase (DsPTP1)
MZ00001562, MZ00048675	12			F2H15.6 (hypothetical protein LOC100274029
MZ00022691	12	x		F3N23.21 (LOC100284789)	phosphatase
MZ00013121	12			F4D11.210 (electron carrier/ electron transporter/ iron ion binding protein)	ferredoxin-related		plastid
MZ00041428	12	x		F9H3.2 (mpv17 / PMP22 family protein)	peroxisomal membrane protein-related		plastid
MZ00007352	12			FRD3 (hypothetical protein LOC100383875)	MATE efflux family protein		membrane
MZ00021988	12	x		GPRI1 (G2-like1)
MZ00037012	12			HSD11BL (11-beta-hydroxysteroid dehydrogenase-like protein)	AtHSD1 (hydroxysteroid dehydrogenase 1); binding / catalytic/ oxidoreductase
MZ00044516	12	x		IDP139 (LOC100126959)
MZ00044596	12	x		LOC100101502 (R2R3MYB-domain protein
MZ00050421	12			LOC100191429 (hypothetical protein LOC100191429	ATMPK20; MAP kinase
MZ00028704	12	x		LOC100193872 (hypothetical protein LOC100193872)
MZ00023251	12			LOC100216641 (hypothetical protein LOC100216641)
MZ00017487	12			LOC100272277 (hypothetical protein LOC100272277	hydrolase, alpha/beta fold family protein
MZ00007502	12			LOC100273156 (hypothetical protein LOC100273156	BETA-OHASE 1 (BETA-HYDROXYLASE 1); carotene beta-ring hydroxylase
MZ00041462	12		x	LOC100273483 (hypothetical protein LOC100273483)	EPR1 (EARLY-PHYTOCHROME-RESPONSIVE1); DNA binding / transcription factor	EPR1 (EARLY-PHYTOCHROME-RESPONSIVE1); DNA binding / transcription factor
MZ00043256	12			LOC100274325 (hypothetical protein LOC100274325)	ATPLT5 (POLYOL TRANSPORTER 5); D-ribose transmembrane transporter/ D-xylose transmembrane transporter/ carbohydrate transmembrane transporter/ galactose transmembrane transporter/ glucose transmembrane transporter/ glycerol transmembrane transporter/
MZ00033510	12			LOC100274568 (hypothetical protein LOC100274568)
MZ00022465	12	x		LOC100274745 (hypothetical protein LOC100274745)
MZ00025282	12			LOC100274936 (hypothetical protein LOC100274936)			plastid
MZ00004328	12		x	LOC100275526 (hypothetical protein LOC100275526)
MZ0004063	12			LOC100277764 (hypothetical protein LOC100277764)
MZ00049020	12			LOC100278190 (hypothetical protein LOC100278190)
MZ00000571	12	x		LOC100278421 (hypothetical protein LOC100278421)	phosphatidic acid phosphatase-related / PAP2-related
MZ00028632	12			LOC100280329 (hypothetical protein LOC100280329		myb family transcription factor
MZ00037112, MZ00043039	12		x	LOC100280533 (PVR3-like protein)	DIR1 (DEFECTIVE IN INDUCED RESISTANCE 1); lipid binding / lipid transporter
MZ00036336	12		x	LOC100281091 (LHY protein)	LHY (LATE ELONGATED HYPOCOTYL); DNA binding / transcription factor	LOC100281091 (LHY protein)
MZ00018338	12			LOC100281754 (terpene synthase 7)
MZ00029714	12	x		LOC100285591 (NAD kinase 1	NADK1 (NAD KINASE 1); NAD+ kinase/ NADH kinase/ calmodulin binding
MZ00046575	12			LOC100304199 (hypothetical protein LOC100304199	CFIM-25
MZ00027457	12			LOC100381563 (hypothetical protein LOC100381563)
MZ00055640	12			LOC100383064 (hypothetical protein LOC100383064)
MZ00029901	12			LOC100383530 (hypothetical protein LOC100383530)	mitochondrionondrial substrate carrier family protein
MZ00005142	12	x		LOC541722 (R2R3MYB-domain protein)		LOC541722 (R2R3MYB-domain protein)
MZ00024442	12			MAPK1 (mitogen-activated protein kinase MAPK1)	MPK9 (MAP KINASE 9); MAP kinase
MZ00026052	12			MFB13.10 (protein AATF)	rRNA processing protein-related		nucleus
MZ00035611, MZ00041252	12	x		MI-1-P SYNTHASE (low phytic acid	MIPS2 (MYO-INOSITOL-1-PHOSTPATE SYNTHASE 2); binding / catalytic/ inositol-3-phosphate synthase
MZ00046839	12			MPK16 (LOC542143)	MPK16; MAP kinase
MZ00037119	12			MRO11.21 (remorin)	remorin family protein
MZ00013268	12			MXE10.6 (hypothetical protein LOC100274460)	pentatricopeptide (PPR) repeat-containing protein		plastid
MZ00003905	12	x		NADK2	NADK2; NAD+ kinase/ calmodulin binding		mitochondrion
MZ00004803	12			nam1 (nam1 protein)	CUC2 (CUP-SHAPED COTYLEDON 2); transcription factor	CUC2 (CUP-SHAPED COTYLEDON 2); transcription factor
MZ00019278	12			Os01g0672800 (hypothetical protein LOC100275604)
MZ00041060	12			Os01g0819400 (ubiquitin-conjugating enzyme E2-17 kDa 9)	UBC9 (UBIQUITIN CONJUGATING ENZYME 9); ubiquitin-protein ligase		plastid
MZ00022700	12			Os02g0157600 (senescence-associated protein DIN1
MZ00036996	12			Os02g0232000 (heat shock factor protein	AT-HSFA7A; DNA binding / transcription factor	AT-HSFA7A; DNA binding / transcription factor
MZ00004304, MZ00027301	12			Os02g0715300 (LOC100278506)
MZ00014947, MZ00014949	12	x		Os02g0819500 (hypothetical protein LOC100279737	OTU-like cysteine protease family protein
MZ00027042	12	x		Os03g0304800 (negatively light-regulated protein)
MZ00028847	12	x		Os03g0334700 (hypothetical protein LOC100304270)	ALA1 (aminophospholipid ATPase1); ATPase, coupled to transmembrane movement of ions, phosphorylative mechanism		membrane
MZ00023248	12			Os03g0364500 (LOC100217304)	plectin-related
MZ00022459, MZ00056331	12			Os03g0638200 (major facilitator superfamily protein	transporter-related
MZ00022163, MZ00047733	12	x		Os04g0175500 (hypothetical protein LOC100191290)
MZ00043026	12			Os06g0196900 (LOC100191248)	CPN20 (CHAPERONIN 20); calmodulin binding
MZ00005198	12			Os06g0329300 (hypothetical protein LOC100275199)
MZ00029261	12	x		Os10g0437600 (starch synthase IIc precursor)	AtSS2 (starch synthase 2); transferase, transferring glycosyl groups
MZ00031617	12			Os12g0484600 (nodulin-like protein)	nodulin family protein		membrane
MZ00032170, MZ00041688	12			pco141944 (LOC100383066)
MZ00043119, MZ00043120	12	x		pco153236 (LOC100283734)	ATSK11; protein kinase/ protein serine/threonine kinase
MZ00043938	12			pip1e (plasma membrane intrinsic protein1)	PIP1;5 (PLASMA MEMBRANE INTRINSIC PROTEIN 1;5); water channel
MZ00017759	12			RHB1A (hypothetical protein LOC100193862)
MZ00029617	12	x		si486037a06 (LOC100216811)	BGLU11 (BETA GLUCOSIDASE 11); hydrolase, hydrolyzing O-glycosyl compounds
MZ00039819, MZ00042560	12			SIP1 (stachyose synthase)	SIP1 (seed imbibition 1-like); galactinol-sucrose galactosyltransferase/ hydrolase, hydrolyzing O-glycosyl compounds
MZ00028467, MZ00044531	12			T17A11.9 (LOC100216884)	glycerol-3-phosphate transporter, putative / glycerol 3-phosphate permease, putative		membrane
MZ00032570, MZ00040768, MZ00046986	12		x	T27F4.8 (LOC100281488)	senescence-associated family protein
MZ00035097	12			T2L5.6 (heparanase-like protein 3)	AtGUS3 (Arabidopsis thaliana glucuronidase 3); beta-glucuronidase		membrane
MZ00039162	12			T31P16.160 (inositol-3-phosphate synthase-like)	MIPS2 (MYO-INOSITOL-1-PHOSTPATE SYNTHASE 2); binding / catalytic/ inositol-3-phosphate synthase
MZ00046670	12			T32M21.100 (hypothetical protein LOC100275551	glycosyltransferase family protein 47
MZ00016414	12	x		T6A23.6 (LOC100282116)	haloacid dehalogenase-like hydrolase family protein
MZ00019954	12			T9E8.110 (hypothetical protein LOC100279842)
MZ00012605	12			T9J14.19 (hypothetical protein LOC100381620)
MZ00052224	12			umc2527 (LOC100277464)
MZ00026250	12			zag2 (Zea AGAMOUS homolog2)	SHP1 (SHATTERPROOF 1); DNA binding / protein binding / transcription factor	zag2 (Zea AGAMOUS homolog2)
MZ00043731	13			ARP2 (hypothetical protein LOC100304239)	ACT7 (ACTIN 7); structural constituent of cytoskeleton
MZ00022133	13			CKL2 (LOC100285095)	ckl4 (Casein Kinase I-like 4); ATP binding / kinase/ protein kinase/ protein serine/threonine kinase
MZ00025376	13			F10A5.12 (LOC100278360)	chaperone protein dnaJ-related		plastid
MZ00028378	13	x		HEMB1 (LOC100284052)	HEMB1; catalytic/ metal ion binding / porphobilinogen synthase
MZ00022508	13			IDP1614 (LOC100193668)	pyruvate decarboxylase family protein
MZ00047985	13			LOC100192975 (hypothetical protein LOC100192975
MZ00022647	13			LOC100282866 (cellular retinaldehyde-binding/triple function, C-terminal)	Rho-GTPase-activating protein-related
MZ00019589	13			LOC100384772 (hypothetical protein LOC100384772)
MZ00043452	13	x		MAPK1 (mitogen-activated protein kinase MAPK1)	MPK9 (MAP KINASE 9); MAP kinase
MZ00024441	13			MPK16 (LOC542143)	MPK16; MAP kinase
MZ00019427	13			NR (NADH:nitrate reductase)	NIA2 (NITRATE REDUCTASE 2); nitrate reductase (NADH)/ nitrate reductase
MZ00020320	13			Os01g0641700 (hypothetical protein LOC100276047)
MZ00017130	13			Os01g0643800 (LOC100191498)	MPK9 (MAP KINASE 9); MAP kinase
MZ00031010	13			Os08g0269500 (retrotransposon protein SINE subclass)			mitochondrion
MZ00026032	13			T13J8.180 (ATPase)	AFG1-like ATPase family protein
MZ00023268	14			AAE7 (hypothetical protein LOC100191849)	AAE7 (ACYL-ACTIVATING ENZYME 7); AMP binding / acetate-CoA ligase
MZ00032022	14			AAP7 (LOC100283931)	AAP7; amino acid transmembrane transporter
MZ00036287	14	x		ADF1 (LOC100280647)	ADF5 (ACTIN DEPOLYMERIZING FACTOR 5); actin binding
MZ00019922	14			AGO4 (hypothetical protein LOC100381552	AGO4 (ARGONAUTE 4); nucleic acid binding
MZ00028859	14			AKN2 (LOC100193315)	adenylylsulfate kinase, putative
MZ00028308	14			AML4 (hypothetical protein LOC100383420	AML4 (ARABIDOPSIS MEI2-LIKE 4); RNA binding / nucleic acid binding / nucleotide binding
MZ00015200	14			ARF1 (LOC100285977)	ARF1 (AUXIN RESPONSE FACTOR 1); DNA binding / transcription factor	ARF1 (AUXIN RESPONSE FACTOR 1); DNA binding / transcription factor	nucleus
MZ00016674	14	x		AST91 (LOC100383552	AST91 (SULFATE TRANSPORTER 91); sulfate transmembrane transporter		membrane
MZ00017757	14	x		AT1G03905 (ATP-dependent transporter YFL028C)	ABC transporter family protein
MZ00031422	14			AT1G04555 (hypothetical protein LOC100193613
MZ00016118	14			AT2G06025 (LOC100273775)	GCN5-related N-acetyltransferase (GNAT) family protein
MZ00023033	14			AT2G40116	phosphoinositide-specific phospholipase C family protein
MZ00004016, MZ00027965	14			AT2G41705 (crcB-like protein	camphor resistance CrcB family protein		plastid
MZ00030254	14			AT3G07700 (LOC100272650)	ABC1 family protein
MZ00016644	14	x		AT3G15090 (reticulon-4-interacting protein 1)	oxidoreductase, zinc-binding dehydrogenase family protein		mitochondrion
MZ00026687	14	x		AT3G15430 (hypothetical protein LOC100382481	regulator of chromosome condensation (RCC1) family protein
MZ00030534, MZ0007575	14			AT3G19970 (hypothetical protein LOC100279593)
MZ00041067	14			AT3G20530 (LOC100216733)	protein kinase family protein
MZ00020990	14			AT3G21090 (LOC100280909)	CER5 (ECERIFERUM 5); ATPase, coupled to transmembrane movement of substances
MZ00025730, MZ00029208	14			AT3G21390 (LOC100194395)	mitochondrionondrial substrate carrier family protein		mitochondrion
MZ00025996	14			AT3G22270 (LOC100272651)
MZ00017226	14			AT3G25730 (DNA-binding protein RAV1)	RAV2 (REGULATOR OF THE ATPASE OF THE VACUOLAR MEMBRANE); DNA binding / transcription factor/ transcription repressor	RAV2 (REGULATOR OF THE ATPASE OF THE VACUOLAR MEMBRANE); DNA binding / transcription factor/ transcription repressor
MZ00030867	14			AT3G26510 (hypothetical protein LOC100278199)	octicosapeptide/Phox/Bem1p (PB1) domain-containing protein
MZ00051976	14			AT3G29770 (esterase PIR7B)	MES11 (METHYL ESTERASE 11); hydrolase		plastid
MZ00015251	14	x		AT3G30390 (LOC100283030)	amino acid transporter family protein		membrane
MZ00027626	14			AT3G46510	PUB13 (PLANT U-BOX 13); ubiquitin-protein ligase
MZ00032718	14			AT3G46660 (hypothetical protein LOC100384802
MZ00042141	14			AT3G51960 (LOC100273140	bZIP transcription factor family protein	bZIP transcription factor family protein	nucleus
MZ00027328, MZ00031941	14	x		AT3G61160	shaggy-related protein kinase beta / ASK-beta (ASK2)
MZ00015935	14			AT4G23800 (hypothetical protein LOC100277069)			plastid
MZ00028747	14			AT5G12350 (LOC100280426)	Ran GTPase binding / chromatin binding / zinc ion binding
MZ00049734	14			ATGSL03	ATGSL12 (GLUCAN SYNTHASE-LIKE 12); 1,3-beta-glucan synthase/ transferase, transferring glycosyl groups		plastid
MZ00018179	14	x		ATMRP4	ATMRP10; ATPase, coupled to transmembrane movement of substances		membrane
MZ00041328	14	x		ATNUDT16 (hypothetical protein LOC100191364)	atnudt16 (Arabidopsis thaliana Nudix hydrolase homolog 16); hydrolase
MZ00017605	14			ATNUDT18 (nudix hydrolase 4	atnudt18 (Arabidopsis thaliana Nudix hydrolase homolog 18); hydrolase
MZ00056816	14			ATSERK5 (BRASSINOSTEROID INSENSITIVE 1-associated receptor kinase 1)	leucine-rich repeat family protein		membrane
MZ00026474, MZ00039273	14			AY107844 (LOC100127007	CP5
MZ00035588, MZ00044402	14			azs4-18 (zein-alpha precursor)
MZ00001809	14			BXL2 (hypothetical protein LOC100279508)	BXL2 (BETA-XYLOSIDASE 2); hydrolase, hydrolyzing O-glycosyl compounds
MZ00013776	14	x		CA1 (LOC100382491)	CA2 (CARBONIC ANHYDRASE 2); carbonate dehydratase/ zinc ion binding		plastid
MZ00025478	14			CAD5 (cinnamyl alcohol dehydrogenase)	ATCAD5 (CINNAMYL ALCOHOL DEHYDROGENASE 5); cinnamyl-alcohol dehydrogenase
MZ00015899	14	x		CCR2 (cinnamoyl CoA reductase1)	CCR1 (CINNAMOYL COA REDUCTASE 1); cinnamoyl-CoA reductase
MZ00027111	14			CDSP32 (electron transporter/ thiol-disulfide exchange intermediate)	CDSP32 (CHLOROPLASTIC DROUGHT-INDUCED STRESS PROTEIN OF 32 KD
MZ00018522	14			CKL6/PAPK1 (hypothetical protein LOC100192492)	ADK1 (dual specificity kinase 1); kinase/ protein serine/threonine/tyrosine kinase
MZ00005031	14			cl55469_1 (LOC100276765
MZ00043398	14			cl718_1(752) (LOC100273868)	ACLA-3; ATP citrate synthase
MZ00048209	14			CRA1	CRA1 (CRUCIFERINA); nutrient reservoir		membrane
MZ00028143	14			CSLD3 (hypothetical protein LOC100383550)	CSLD3 (CELLULOSE SYNTHASE-LIKE D3); cellulose synthase/ transferase, transferring glycosyl groups		ER
MZ00049027	14			CYP90D1 (hypothetical protein LOC100384722)	ROT3 (ROTUNDIFOLIA 3); oxidoreductase, acting on paired donors, with incorporation or reduction of molecular oxygen, NADH or NADPH as one donor, and incorporation of one atom of oxygen / oxygen binding / steroid hydroxylase
MZ00017454	14	x		CYT1 (LOC100274471)	CYT1 (CYTOKINESIS DEFECTIVE 1); mannose-1-phosphate guanylyltransferase/ nucleotidyltransferase
MZ00033001	14			DIS2 (LOC100282664)	DIS2 (DISTORTED TRICHOMES 2); structural molecule
MZ00015923, MZ00041991	14			DL3505W (acid phosphatase)	acid phosphatase survival protein SurE, putative
MZ00048967	14			ECA3 (hypothetical protein LOC100382948)			membrane
MZ00056148	14			EOL1 (LOC100281454)	EOL1 (ETO1-LIKE 1); binding / protein binding
MZ00042317	14			esr1 (embryo surrounding region1)
MZ00015914	14			F13G24.220 (hypothetical protein LOC100273584)	replication protein, putative		nucleus
MZ00028097	14			F13K9.27 (hypothetical protein LOC100217307
MZ00038453	14			F14F8.130 (hypothetical protein LOC100193155)	RNA-binding S4 domain-containing protein		mitochondrion
MZ00027082	14	x		F14O23.19	ABC1 family protein
MZ00016207	14			F15C21.2 (LOC100193636	ACC1 (ACETYL-COENZYME A CARBOXYLASE 1); acetyl-CoA carboxylase
MZ00004557	14			F15D2.25 (hypothetical protein LOC100276924)
MZ00025760	14			F16A16.60 (LOC100191332)	methyltransferase/ nucleic acid binding
MZ00004433	14	x		F16B3.14 (hypothetical protein LOC100273073)	regulator of chromosome condensation (RCC1) family protein	regulator of chromosome condensation (RCC1) family protein
MZ00039528	14			F16B3.34 (beta-catenin-like protein 1)	nuclear associated protein-related / NAP-related
MZ00029778	14			F16N3.18
MZ00020747	14			F17A13.90 (acid phosphatase 1)	acid phosphatase, putative		membrane
MZ00032458	14			F17A8.90 (LOC100274182)	AtGH9B15 (Arabidopsis thaliana glycosyl hydrolase 9B15); catalytic/ hydrolase, hydrolyzing O-glycosyl compounds
MZ00017976, MZ00027970	14	x		F17K2.20 (LOC100191712)	calcineurin B subunit-related
MZ00018042	14			F17M5.150 (LOC100304438)
MZ00020352	14	x		F20O9.250 (hypothetical protein LOC100304435)	RAB GTPase activator
MZ00016591	14			F21J9.10 (hypothetical protein LOC100192826)	protein binding / zinc ion binding
MZ00026413	14			F21M11.12 (LOC100282251)	VPS2.3 (VACUOLAR PROTEIN SORTING-ASSOCIATED PROTEIN 2.3)
MZ00046679	14			F22O13.25 (hypothetical protein LOC100275431)
MZ00043586	14			F23H14.3 (MYB-CC type transfactor)	myb family transcription factor	F23H14.3 (MYB-CC type transfactor)	nucleus
MZ00055669	14			F25I18.3 (LOC100281459)	flavin-containing monooxygenase family protein / FMO family protein
MZ00028817	14	x		F25P22.7 (LOC100304216)	oxidoreductase, acting on the CH-CH group of donors		plastid
MZ00004169	14			F26B6.17	catalytic/ pyridoxal phosphate binding
MZ00015927	14			F28P22.8 (hypothetical protein LOC100272835)	DEAD/DEAH box helicase, putative		membrane
MZ00027053	14			F2KP (fructose-6-phosphate-2-kinase/fructose-2,6-bisphosphatase)	F2KP (FRUCTOSE-2,6-BISPHOSPHATASE); fructose-2,6-bisphosphate 2-phosphatase
MZ00040384	14			F3L17.8 (LOC100275558)			membrane
MZ00020038	14			F4I1.1 (hypothetical protein LOC100383562)
MZ00030263	14			F4L23.15	leucine-rich repeat transmembrane protein kinase, putative		membrane
MZ00012671	14			F4N2.22 (RNA-binding protein)	AFP3 (ABI FIVE BINDING PROTEIN 3)		nucleus
MZ00035581	14			F5M6.18	formin homology 2 domain-containing protein / FH2 domain-containing protein		membrane
MZ00018589	14			F5O24.40 (LOC100216711)	SPX2 (SPX DOMAIN GENE 2)
MZ00034423	14			F6N23.16 (NADP-dependent malic enzyme	ATNADP-ME2 (NADP-malic enzyme 2); malate dehydrogenase (oxaloacetate-decarboxylating) (NADP+)/ malic enzyme/ oxidoreductase, acting on NADH or NADPH, NAD or NADP as acceptor		mitochondrion
MZ00017276	14	x		F7A7.220 (LOC100281394)	protein phosphatase 2C, putative / PP2C, putative
MZ00016383	14	x		F7L13.10 (LOC100277615)
MZ00028947, MZ00029959	14			F8K7.20 (LOC100285517)	FBP7 (F-BOX PROTEIN 7)
MZ00031146	14			F9C16.20 (hypothetical protein LOC100192013)
MZ00042131	14	x		FATB (LOC100283590)	FATB (fatty acyl-ACP thioesterases B); acyl carrier/ acyl-[acyl-carrier-protein] hydrolase		plastid
MZ00025621	14			FIP1 (hypothetical protein LOC100216713)	FIP1 (FH INTERACTING PROTEIN 1)
MZ00019730	14			GAE1 (LOC732831)	GAE1 (UDP-D-GLUCURONATE 4-EPIMERASE 1); UDP-glucuronate 4-epimerase/ catalytic
MZ00036984	14			GPX2 (phospholipid hydroperoxide glutathione peroxidase)	ATGPX5 (glutathione peroxidase 5); glutathione peroxidase
MZ00013343	14			H4C14 (histone H4)	HIS4; DNA binding	H4C14 (histone H4)
MZ00035921	14			HK1b1 (LOC732762)	WOL (WOODEN LEG); cytokinin receptor/ osmosensor/ phosphoprotein phosphatase/ protein histidine kinase
MZ00013475	14			HSD11BL (11-beta-hydroxysteroid dehydrogenase-like protein)	AtHSD1 (hydroxysteroid dehydrogenase 1); binding / catalytic/ oxidoreductase
MZ00024895	14			HVA22B (hypothetical protein LOC100193678	ATHVA22A
MZ00052063	14			IDP139 (LOC100126959)
MZ00055766	14			IDP155 (LOC100127008) senescence-associated protein DIN1
MZ00029376	14			K21L13.3 (LOC100285401	protein kinase, putative
MZ00006071, MZ00029230	14			K2A18.4 (auxin Efflux Carrier family protein)	auxin efflux carrier family protein
MZ00026292	14			KEG
MZ00039299	14			LOC100101516 (zein-alpha 19D1)
MZ00037948	14			LOC100101518 (alpha-zein protein)
MZ00043499	14			LOC100191328 (hypothetical protein LOC100191328	FAD2 (FATTY ACID DESATURASE 2); delta12-fatty acid dehydrogenase/ omega-6 fatty acid desaturase
MZ00005856	14			LOC100191396 (hypothetical protein LOC100191396)	zinc finger (C3HC4-type RING finger) family protein
MZ00016466	14			LOC100191429 (hypothetical protein LOC100191429	ATMPK20; MAP kinase
MZ00043877	14			LOC100191634 (hypothetical protein LOC100191634)	ACT domain-containing protein
MZ00025267	14			LOC100191668 (hypothetical protein LOC100191668)	ATRBL2 (Arabidopsis thaliana Rhomboid-like 2); serine-type endopeptidase
MZ00049567	14			LOC100192587 (hypothetical protein LOC100192587)	MEE55 (maternal effect embryo arrest 55)		membrane
MZ00042117	14			LOC100192674 (hypothetical protein LOC100192674)	EDL2 (EID1-like 2)
MZ00044744	14			LOC100192817 (hypothetical protein LOC100192817)
MZ00024726	14			LOC100193444 (hypothetical protein LOC100193444)	AXR3 (AUXIN RESISTANT 3); transcription factor	AXR3 (AUXIN RESISTANT 3); transcription factor
MZ00025007	14			LOC100193861 (hypothetical protein LOC100193861)
MZ00014140	14	x		LOC100193904 (hypothetical protein LOC100193904)
MZ00024755	14			LOC100193984 (hypothetical protein LOC100193984)	GTP cyclohydrolase I		mitochondrion
MZ00034308	14			LOC100194135 (hypothetical protein LOC100194135)
MZ00015493	14			LOC100216628 (hypothetical protein LOC100216628)	basic helix-loop-helix (bHLH) family protein	basic helix-loop-helix (bHLH) family protein
MZ00040323	14			LOC100216715 (hypothetical protein LOC100216715)	phosphatidyl serine synthase family protein
MZ00019292	14			LOC100216791 (hypothetical protein LOC100216791)
MZ00027755, MZ00055848	14			LOC100216835 (hypothetical protein LOC100216835)
MZ00013636, MZ00022395	14			LOC100216960 (hypothetical protein LOC100216960)
MZ00030479	14	x		LOC100217298 (hypothetical protein LOC100217298)	aldose 1-epimerase family protein
MZ00043440	14	x		LOC100217303 (hypothetical protein LOC100217303)	ACT7 (ACTIN 7); structural constituent of cytoskeleton
MZ00013226	14			LOC100272277 (hypothetical protein LOC100272277	hydrolase, alpha/beta fold family protein
MZ00034379	14			LOC100272571 (hypothetical protein LOC100272571)	emb1879 (embryo defective 1879)		mitochondrion
MZ00024449	14			LOC100273246 (hypothetical protein LOC100273246)	DET3 (DE-ETIOLATED 3); proton-transporting ATPase, rotational mechanism
MZ00021963	14			LOC100273556 (hypothetical protein LOC100273556)	transducin family protein / WD-40 repeat family protein	transducin family protein / WD-40 repeat family protein
MZ00020355	14			LOC100273847 (hypothetical protein LOC100273847
MZ00001145	14			LOC100273871 (hypothetical protein LOC100273871
MZ00038589	14		x	LOC100274176 (hypothetical protein LOC100274176)	mitochondrionondrial substrate carrier family protein
MZ00056321	14			LOC100274346 (hypothetical protein LOC100274346)
MZ00036519	14			LOC100274515 (hypothetical protein LOC100274515)	fructose-bisphosphate aldolase, putative
MZ0004688	14			LOC100274603 (hypothetical protein LOC100274603)
MZ00018274	14	x		LOC100274668 (hypothetical protein LOC100274668)
MZ00012677	14			LOC100274679 (hypothetical protein LOC100274679)
MZ00007191	14			LOC100274745 (hypothetical protein LOC100274745)
MZ00027325	14			LOC100274929 (hypothetical protein LOC100274929)
MZ00036849	14			LOC100274979 (hypothetical protein LOC100274979)
MZ0001463	14			LOC100275496 (hypothetical protein LOC100275496)
MZ00019120	14			LOC100275750 (hypothetical protein LOC100275750)
MZ00033148	14			LOC100275835 (hypothetical protein LOC100275835
MZ00029511	14			LOC100276748 (hypothetical protein LOC100276748)
MZ00042729	14			LOC100277139 (hypothetical protein LOC100277139)
MZ00055035	14			LOC100277682 (hypothetical protein LOC100277682)
MZ00004144	14			LOC100277721 (hypothetical protein LOC100277721)
MZ00025442	14	x		LOC100278686 (hypothetical protein LOC100278686)
MZ00000381	14			LOC100279105 (hypothetical protein LOC100279105
MZ00019869	14			LOC100279486 (hypothetical protein LOC100279486)
MZ00018738	14			LOC100279601 (hypothetical protein LOC100279601	zinc finger (CCCH-type/C3HC4-type RING finger) family protein	zinc finger (CCCH-type/C3HC4-type RING finger) family protein
MZ00015156	14			LOC100280027 (hypothetical protein LOC100280027	phagocytosis and cell motility protein ELMO1-related
MZ00016032	14	x		LOC100280582 (ethylene-responsive transcription factor 4)	ERF4 (ETHYLENE RESPONSIVE ELEMENT BINDING FACTOR 4); DNA binding / protein binding / transcription factor/ transcription repressor	LOC100280582 (ethylene-responsive transcription factor 4)
MZ00018868	14			LOC100281710 (DNA binding protein)
MZ00046983	14			LOC100282445 (acetylglucosaminyltransferase/ transferase, transferring glycosyl groups	glycosyl transferase family 17 protein
MZ00024440	14			LOC100283132 (sugar transport protein 5)	monosaccharide transporter, putative
MZ00005938	14			LOC100283190 (OB-fold nucleic acid binding domain containing protein)	DNA-binding protein-related
MZ00005145	14			LOC100284649 (zinc finger, C3HC4 type family protein)		LOC100284649 (zinc finger, C3HC4 type family protein)
MZ00017837	14			LOC100285120 (kinesin-4)	ATP binding / microtubule motor
MZ00052496	14			LOC100304070 (MYB transcription factor TaMYB1)	MYBR1 (MYB DOMAIN PROTEIN R1); DNA binding / transcription factor	LOC100304070 (MYB transcription factor TaMYB1)
MZ00037175	14			LOC100304327 (hypothetical protein LOC100304327)	AGO1 (ARGONAUTE 1); endoribonuclease/ miRNA binding / protein binding / siRNA binding
MZ00027452	14			LOC100304348 (hypothetical protein LOC100304348)
MZ00042189	14			LOC100381701 (hypothetical protein LOC100381701)
MZ00040477	14			LOC100382025 (hypothetical protein LOC100382025
MZ00036581	14			LOC100382505 (hypothetical protein LOC100382505)
MZ00032056	14			LOC100382633 (hypothetical protein LOC100382633)
MZ00055343	14			LOC100383246 (hypothetical protein LOC100383246	NF-YA7 (NUCLEAR FACTOR Y, SUBUNIT A7); specific transcriptional repressor/ transcription factor	NF-YA7 (NUCLEAR FACTOR Y, SUBUNIT A7); specific transcriptional repressor/ transcription factor	nucleus
MZ00021558	14			LOC100383475 (hypothetical protein LOC100383475)	PAG1; endopeptidase/ peptidase/ threonine-type endopeptidase
MZ00032994	14			LOC100383506 (hypothetical protein LOC100383506)
MZ00019687	14			LOC100384128 (hypothetical protein LOC100384128)
MZ00043083, MZ00056348	14			LOC542285 (LOC542285)	GRF2 (GENERAL REGULATORY FACTOR 2); protein binding / protein phosphorylated amino acid binding
MZ00015404	14			m24 (Zea mays MADS24)	SEP1 (SEPALLATA1); DNA binding / transcription factor	SEP1 (SEPALLATA1); DNA binding / transcription factor
MZ00013744	14	x		M3E9.40 (LOC100272845)	fructose-bisphosphate aldolase, putative
MZ00014110	14			MAJ23.3 (LOC542176)	WIN2 (HOPW1-1-INTERACTING 2); protein serine/threonine phosphatase
MZ00031823	14			mapkkk1 (NPK1-related protein kinase-like protein)	MAPKKK17; ATP binding / kinase/ protein kinase/ protein serine/threonine kinase
MZ00013963, MZ00036109	14	x		MCO15.7 (VTC2)	VTC5 (VITAMIN C DEFECTIVE 5); GDP-D-glucose phosphorylase/ galactose-1-phosphate guanylyltransferase (GDP)/ quercetin 4'-O-glucosyltransferase
MZ00026320	14			MFB16.14 (hypothetical protein LOC100304361)	ATFP3; metal ion binding / transition metal ion binding
MZ00014371	14			MFB16.26 (hypothetical protein LOC100273779	nodulin MtN3 family protein		membrane
MZ00038469	14			MFP2 (glyoxysomal fatty acid beta-oxidation multifunctional protein MFP-a)	MFP2 (MULTIFUNCTIONAL PROTEIN 2); 3-hydroxyacyl-CoA dehydrogenase/ enoyl-CoA hydratase
MZ00019583	14			MJB21.14
MZ00015216	14	x		MNI5.3 (xylulose kinase)	xylulose kinase, putative
MZ00022889	14		x	MNJ8.4 (LOC100280442)	RVE2 (REVEILLE 2); DNA binding / transcription factor	RVE2 (REVEILLE 2); DNA binding / transcription factor
MZ00041372	14			MUA2.10 (LOC100285134)	xyloglucan:xyloglucosyl transferase, putative / xyloglucan endotransglycosylase, putative / endo-xyloglucan transferase, putative		membrane
MZ00025863	14			NAK (protein kinase APK1A)	NAK; ATP binding / kinase/ protein kinase/ protein serine/threonine kinase/ protein tyrosine kinase
MZ00035788	14			NR (NADH:nitrate reductase)	NIA2 (NITRATE REDUCTASE 2); nitrate reductase (NADH)/ nitrate reductase
MZ00022387, MZ00030345	14			Os01g0101200 (LOC100194257)	haloacid dehalogenase-like hydrolase family protein
MZ00056178	14			Os01g0170600 (hypothetical protein LOC100276920)	universal stress protein (USP) family protein
MZ00033408	14			Os01g0217800 (LOC100284612)
MZ00020065	14			Os01g0607900 (hypothetical protein LOC100279562)	leucine-rich repeat transmembrane protein kinase, putative
MZ00016654	14			Os01g0704000 (LOC100216771)
MZ00017933, MZ00027958	14			Os01g0727100 (transferase, transferring glycosyl groups)	GAUT15 (Galacturonosyltransferase 15); polygalacturonate 4-alpha-galacturonosyltransferase/ transferase, transferring glycosyl groups / transferase, transferring hexosyl groups
MZ00040171	14			Os01g0811300 (LOC541980)	SUVH1 (SU(VAR)3-9 HOMOLOG 1); histone methyltransferase
MZ00025099	14			Os01g0876500 (hypothetical protein LOC100193321)	RNA recognition motif (RRM)-containing protein
MZ00027593	14			Os01g0900900 (hypothetical protein LOC100275661	OTU-like cysteine protease family protein		mitochondrion
MZ00028181	14			Os01g0928000 (LOC100193144)	ICE1 (INDUCER OF CBF EXPRESSION 1); DNA binding / transcription activator/ transcription factor	ICE1 (INDUCER OF CBF EXPRESSION 1); DNA binding / transcription activator/ transcription factor
MZ00024846	14			Os02g0157600 (senescence-associated protein DIN1
MZ00001000	14			Os02g0221900 (hypothetical protein LOC100279319)	CYP711A1; electron carrier/ heme binding / iron ion binding / monooxygenase/ oxygen binding
MZ0005992	14			Os02g0232000 (heat shock factor protein	AT-HSFA7A; DNA binding / transcription factor	AT-HSFA7A; DNA binding / transcription factor
MZ00048089	14	x		Os02g0526000 (LOC100193923)			membrane
MZ00044565	14			Os02g0551900 (hypothetical protein LOC100193305)	zinc finger (C2H2 type) family protein	zinc finger (C2H2 type) family protein	mitochondrion
MZ00024643	14			Os02g0708000 (hypothetical protein LOC100216613)
MZ00030640	14			Os02g0749300 (shikimate kinase)	shikimate kinase, putative
MZ00017310	14	x		Os02g0798600 (LOC100273142)	zinc finger (C3HC4-type RING finger) family protein	zinc finger (C3HC4-type RING finger) family protein
MZ00022880	14			Os02g0822100 (LOC100281495)	transmembrane protein, putative
MZ00024393	14	x		Os03g0160200 (LOC100277219)
MZ00016235	14			Os03g0180300 (LOC100276788)
MZ00027119	14			Os03g0243600 (hypothetical protein LOC100274428)			membrane
MZ00036781	14			Os03g0305100 (LOC100281089)	AAE7 (ACYL-ACTIVATING ENZYME 7); AMP binding / acetate-CoA ligase
MZ00015794	14			Os03g0430400 (hypothetical protein LOC100280238)	transcription factor jumonji (jmjC) domain-containing protein	transcription factor jumonji (jmjC) domain-containing protein
MZ00029389	14			Os03g0633800 (hypothetical protein LOC100216870)	SHY2 (SHORT HYPOCOTYL 2); transcription factor	SHY2 (SHORT HYPOCOTYL 2); transcription factor
MZ00044564	14			Os03g0638200 (major facilitator superfamily protein	transporter-related
MZ00056026	14			Os03g0685900 (hypothetical protein LOC100276950)
MZ00021691	14			Os03g0734900 (GATA transcription factor 25)	TIFY2A; sequence-specific DNA binding / transcription factor/ zinc ion binding	TIFY2A; sequence-specific DNA binding / transcription factor/ zinc ion binding
MZ00028925	14			Os04g0405500 (hypothetical protein LOC100279539)
MZ00019737	14			Os04g0502900 (calcium binding atopy-related autoantigen 1)	calcium-binding EF hand family protein		mitochondrion
MZ00029538	14			Os04g0544100 (SET domain-containing protein SET104)
MZ00016442	14			Os04g0619900 (hypothetical protein LOC100276280)	ATBAG4 (ARABIDOPSIS THALIANA BCL-2-ASSOCIATED ATHANOGENE 4); protein binding
MZ00000802	14			Os04g0626100 (AT hook motif family protein)
MZ00035224	14	x		Os05g0109600 (LOC100279770)	APUM1 (Arabidopsis Pumilio 1); RNA binding / binding
MZ00012767	14			Os05g0304800
MZ00028900	14			Os05g0370300 (src2-like protein)
MZ00032355	14			Os05g0406000 (LOC100272847)
MZ00012614	14			Os05g0541800 (LOC100282355)	jacalin lectin family protein
MZ00042789	14			Os05g0560400 (hypothetical protein LOC100193706)	AtTLP7 (TUBBY LIKE PROTEIN 7); phosphoric diester hydrolase/ transcription factor	AtTLP7 (TUBBY LIKE PROTEIN 7); phosphoric diester hydrolase/ transcription factor
MZ00018791	14	x		Os06g0499500 (LOC100193303)	JAR1 (JASMONATE RESISTANT 1); ATP binding / adenylyltransferase/ catalytic/ jasmonate-amino synthetase		plastid
MZ0003823	14			Os06g0519400 (hypothetical protein LOC100273243)	ZFN1 (ZINC FINGER PROTEIN 1); DNA binding / nuclease/ nucleic acid binding		plastid
MZ00016853	14			Os06g0729400 (gibberellin-regulated protein 1)
MZ00055563	14			Os07g0510200 (glucan endo-1,3-beta-glucosidase 3	glycosyl hydrolase family 17 protein
MZ00056789	14			Os07g0557500 (hypothetical protein LOC100191882)			mitochondrion
MZ00020588	14			Os07g0671100
MZ00013618, MZ00044457	14	x		Os07g0687000 (hypothetical protein LOC100381968)	CIPK9 (CBL-INTERACTING PROTEIN KINASE 9); ATP binding / kinase/ protein kinase/ protein serine/threonine kinase
MZ00015742	14			Os08g0384100 (LOC100191297)
MZ00016278	14			Os08g0506100
MZ00027732	14			Os08g0539300 (hypothetical protein LOC100216604)
MZ00038338, MZ00039001	14	x		Os09g0479800 (LOC100192478)	PFK7 (PHOSPHOFRUCTOKINASE 7); 6-phosphofructokinase
MZ00015492	14			Os09g0501600 (BHLH transcription factor)	basic helix-loop-helix (bHLH) family protein	Os09g0501600 (BHLH transcription factor)
MZ00029373	14			Os09g0516700 (hypothetical protein LOC100191399)
MZ00028442	14	x		Os09g0525400 (LOC100193125)	BB (BIG BROTHER); protein binding / ubiquitin-protein ligase/ zinc ion binding
MZ0004478, MZ00038583	14			Os10g0190500 (hypothetical protein LOC100383473)			membrane
MZ00023312	14	x		Os10g0376200 (LOC100191600	protein binding		mitochondrion
MZ00016578	14			Os10g0561400 (LOC542109)	myb family transcription factor	myb family transcription factor
MZ00024572	14			Os10g0573800 (hypothetical protein LOC100273155)	BOU (A BOUT DE SOUFFLE); binding / transporter
MZ00018186	14			Os11g0170000 (hypothetical protein LOC100273549)	AtFAAH (Arabidopsis thaliana fatty acid amide hydrolase); N-(long-chain-acyl)ethanolamine deacylase/ amidase
MZ00048705	14			Os11g0585900 (hypothetical protein LOC100279911)	EOL1 (ETO1-LIKE 1); binding / protein binding
MZ00021175	14			Os11g0644800 (hypothetical protein LOC100191816
MZ00027691	14	x		Os12g0103000 (hypothetical protein LOC100381606)	binding
MZ00044132	14			Os12g0243100 (hypothetical protein LOC100279053)
MZ00014080	14	x		Os12g0626400 (phytoene synthase2)	phytoene synthase (PSY) / geranylgeranyl-diphosphate geranylgeranyl transferase		plastid
MZ00026344	14	x		OsCAO1 (hypothetical protein LOC100274228)	CH1 (CHLORINA 1); chlorophyllide a oxygenase		plastid
MZ00025622	14	x		pco074808b (LOC100273259)	haloacid dehalogenase-like hydrolase family protein
MZ00015955	14			pco114187(763) (LOC100277199)
MZ00028501	14			pco121900 (LOC100381529)	MIPS2 (MYO-INOSITOL-1-PHOSTPATE SYNTHASE 2); binding / catalytic/ inositol-3-phosphate synthase
MZ00043718	14			pco133381 (LOC100284520)
MZ00016499, MZ00042099	14			pco142939 (LOC100273563)	leucine-rich repeat family protein
MZ00015486	14			PDX2 (LOC100280887)	PDX2 (PYRIDOXINE BIOSYNTHESIS 2); glutaminase/ glutaminyl-tRNA synthase (glutamine-hydrolyzing)/ protein heterodimerization
MZ00055647	14			PEX11B (peroxisomal biogenesis factor 11 family protein)	PEX11B
MZ00040555	14	x		pip1e (plasma membrane intrinsic protein1)	PIP1;5 (PLASMA MEMBRANE INTRINSIC PROTEIN 1;5); water channel
MZ00016321	14	x		PIP2;8/PIP3B (plasma membrane intrinsic protein2)	PIP2B (PLASMA MEMBRANE INTRINSIC PROTEIN 2); water channel
MZ00038068	14	x		pip2-5 (plasma membrane intrinsic protein)	aquaporin PIP2-1		membrane
MZ00005408	14			PLDD (hypothetical protein LOC100217111)	ATPLDDELTA; phospholipase D
MZ00036719	14			PR1 (LOC100272820)	PR1 (PATHOGENESIS-RELATED GENE 1)
MZ00018570	14	x		PUB17 (hypothetical protein LOC100381946)	PUB17 (PLANT U-BOX 17); ubiquitin-protein ligase
MZ00015809	14	x		RBOHF (LOC100037794)	ATRBOH F (ARABIDOPSIS THALIANA RESPIRATORY BURST OXIDASE PROTEIN F); NAD(P)H oxidase		membrane
MZ00043812	14	x		RCA (RUBISCO activase1) ribulose bisphosphate carboxylase/oxygenase activase, chloroplastic precursor	RCA (RUBISCO ACTIVASE); ADP binding / ATP binding / enzyme regulator/ ribulose-1,5-bisphosphate carboxylase/oxygenase activator		plastid
MZ00026320	14			RD28 (plasma membrane intrinsic protein2) aquaporin PIP2-4	PIP2A (PLASMA MEMBRANE INTRINSIC PROTEIN 2A); water channel
MZ00026094	14			RHC1A (LOC100283413)	RHC1A; protein binding / zinc ion binding		mitochondrion
MZ00018099	14			SERAT1;1 (serine acetyltransferase3)	ATSERAT1;1 (ARABIDOPSIS THALIANA SERINE ACETYLTRANSFERASE 1;1); serine O-acetyltransferase
MZ00028122	14			SFR2 (beta-glycosidase-like)	SFR2 (SENSITIVE TO FREEZING 2); beta-glucosidase/ hydrolase, hydrolyzing O-glycosyl compounds
MZ00044750	14			si606041a06 (LOC100272780)	UGT75B1 (UDP-GLUCOSYLTRANSFERASE 75B1); UDP-glucose:4-aminobenzoate acylglucosyltransferase/ UDP-glucosyltransferase/ UDP-glycosyltransferase/ abscisic acid glucosyltransferase/ transferase, transferring glycosyl groups
MZ00019761	14			SIP-1 (starch branching enzyme interacting protein-1)
MZ00018284	14			SLP2 (hypothetical protein LOC100382040)	SLP2; serine-type peptidase
MZ00015725	14			T10D10.10 (LOC100281911)
MZ00021172	14	x		T10I14.20 (hypothetical protein LOC100278652)
MZ00024958	14			T11J7.13 (Pti1-like kinase-like)	serine/threonine protein kinase, putative
MZ00003838	14			T15J14.6 (hypothetical protein LOC100275610)
MZ00018342	14			T16B5.12 (LOC100285827)			membrane
MZ00012666	14			T19L5.60 (hypothetical protein LOC100272796)
MZ00014416	14			T1O24.24 (hypothetical protein LOC100191188)	RWP-RK domain-containing protein
MZ00042777	14			T20K18.110 (hypothetical protein LOC100276581)
MZ00033435	14			T22B4.100 (LOC100194093)	translation elongation factor Ts (EF-Ts), putative
MZ00044161	14			T22H22.2	esterase/lipase/thioesterase family protein
MZ00019581	14		x	T22J18.8 (hypothetical protein LOC100276065)			membrane
MZ00015548	14			T22N19.3			plastid
MZ00019214	14	x		T25K17.80 (6-phosphofructokinase 2)	PFK7 (PHOSPHOFRUCTOKINASE 7); 6-phosphofructokinase
MZ00041651	14			T27D20.12 (hypothetical protein LOC100191324)
MZ00028813	14			T28I24.5
MZ00024816	14			T28P16.12 (fructokinase 1)	pfkB-type carbohydrate kinase family protein
MZ00014162, MZ00041416	14			T29J13.180 (LOC100274318)	dicarboxylate/tricarboxylate carrier (DTC)		mitochondrion
MZ00026652	14			T2G17.15 (hypothetical protein LOC100279221)	protein serine/threonine phosphatase
MZ00017447	14			T32F6.3 (hypothetical protein LOC100279377)	calcium-binding EF hand family protein
MZ00015728	14			T3F20.23 (hypothetical protein LOC100276848)
MZ00001825	14			T5J17.170 (LOC100272508)	NOL1/NOP2/sun family protein
MZ00029187	14			T6A23.6 (LOC100282116)	haloacid dehalogenase-like hydrolase family protein
MZ00025970	14			T6L1.4 (LOC100191217)	peroxidase, putative		membrane
MZ00031253	14			TAT3 (LOC100274472)	aminotransferase class I and II family protein
MZ00015443	14			TIDP2672 (LOC100274329)
MZ00021144, MZ00054923	14			TIDP2769 (LOC100283865)	peroxidase 27 (PER27) (P27) (PRXR7)
MZ00041313	14			TMP-C (transmembrane protein)	PIP1;5 (PLASMA MEMBRANE INTRINSIC PROTEIN 1;5); water channel
MZ00035946	14			UGT73C2 (hypothetical protein LOC100216716)			membrane
MZ00028251	14			umc1527 (LOC100192924)	SHY2 (SHORT HYPOCOTYL 2); transcription factor	SHY2 (SHORT HYPOCOTYL 2); transcription factor
MZ00001259	14			umc2617 (LOC100191568)
MZ00018166	14	x	x	umc2762 (LOC100193329	zinc finger (B-box type) family protein
MZ00051829	14			WNK5	WNK5 (WITH NO LYSINE (K) KINASE 5); protein kinase
MZ00056648	14			XIK (myosin1)	XIK; motor/ protein binding
MZ00004498	14			ZIFL2 (hypothetical protein LOC100280090)	ZIFL2 (ZINC INDUCED FACILITATOR-like 2); carbohydrate transmembrane transporter/ sugar:hydrogen symporter		membrane
day
Maizearray ID				gene annotation (Zea mays)	gene annotation (Arabidopsis thaliana)	transcription factor	cell component
MZ00015643, MZ00046814	15	x		ABA1 (zeaxanthin epoxidase)	zeaxanthin epoxidase
MZ00026527	15			APRR3 (hypothetical protein LOC100273598)	APRR5 (ARABIDOPSIS PSEUDO-RESPONSE REGULATOR 5); transcription regulator/ two-component response regulator
MZ00042339	15			AT3G54500 (hypothetical protein LOC100275614)
MZ00019918	15			AT3G62040 (LOC100284091)	catalytic/ hydrolase
MZ00017625	15	x		F15K9.6 (hypothetical protein LOC100280384)
MZ00030103	15	x		F4I18.30 (hypothetical protein LOC100279787)	armadillo/beta-catenin repeat family protein
MZ00042952	15			LHCB2.2 (chlorophyll a-b binding protein 2) chlorophyll a-b binding protein 1, chloroplastic precursor	LHB1B2; chlorophyll binding
MZ00036447	15	x	x	lhcb7 (light harvesting complex mesophyll7) light harvesting chlorophyll a /b binding protein	LHB1B2; chlorophyll binding
MZ00014041	15			LOC100273503 (hypothetical protein LOC100273503)	ALAAT2 (ALANINE AMINOTRANSFERASE 2); ATP binding / L-alanine:2-oxoglutarate aminotransferase
MZ00032769	15	x		LOC100275836 (hypothetical protein LOC100275836)
MZ00017446	15			LOC100279043 (hypothetical protein LOC100279043)
MZ00029712	15		x	LOC100285170 (two-component response regulator-like PRR95)
MZ00026477	15			LOC100285554 (calcium-dependent protein kinase, isoform AK1)	calcium-dependent protein kinase, isoform AK1
MZ00028978	15			LOC100384487 (hypothetical protein LOC100384487)
MZ00023546	15		x	LOC542287 (hypothetical LOC542287)
MZ00046478	15			Os01g0934400 (hypothetical protein LOC100274771)	calcium ion binding
MZ00051893	15			Os03g0388100 (copper-transporting ATPase PAA1)	copper-transporting ATPase PAA1
MZ00029244	15			Os03g0682200 (hypothetical protein LOC100384259)	ZLL (ZWILLE); translation initiation factor
MZ00024739	16	x	x	AT3G53830 (hypothetical protein LOC100274159	regulator of chromosome condensation (RCC1) family protein	regulator of chromosome condensation (RCC1) family protein
MZ00014272	16		x	LOC100281091 (LHY protein)	LHY (LATE ELONGATED HYPOCOTYL); DNA binding / transcription factor	LOC100281091 (LHY protein)
MZ00038878	16			MI-1-P SYNTHASE (low phytic acid	MIPS2 (MYO-INOSITOL-1-PHOSTPATE SYNTHASE 2); binding / catalytic/ inositol-3-phosphate synthase
MZ00019908	16			Os02g0226200 (hypothetical protein LOC100191227)	phosphatase
MZ00055422	16			Os08g0178800 (hypothetical protein LOC100383388)	zinc finger (B-box type) family protein	zinc finger (B-box type) family protein
MZ00025487	16	x		T31P16.120 (LOC100192702)
MZ00057138	17	x		AST91 (LOC100383552)	sulfate transporter		membrane
MZ00019752	17			AT3G22540 (hypothetical protein LOC100275909)
MZ00029003	17			cl47266_1b (LOC100286194)
MZ00035995	17			F17I14.10 (photoperiod responsive protein)
MZ00025012	17			FAB1 (LOC100193451)	fatty-acid synthase		plastid
MZ00026581	17			LOC100272992 (hypothetical protein LOC100272992)	FLS (FLAVONOL SYNTHASE); flavonol synthase
MZ00014917	17	x	x	LOC100276227 (hypothetical protein LOC100276227)
MZ00028679	17			LOC100284585 (isoflavone reductase IRL)	isoflavone reductase IRL
MZ00014918	17		x	MHJ24.1 (LOC100276005)	dentin sialophosphoprotein-related
MZ00021786	17			MUB3.18 (U-box domain containing protein)	U-box domain-containing protein
MZ00033555	17			Os01g0231000 (LOC100274569)	PAP2 (PHYTOCHROME-ASSOCIATED PROTEIN 2); transcription factor	PAP2 (PHYTOCHROME-ASSOCIATED PROTEIN 2); transcription factor
MZ00037305	17			Os04g0179700 (ent-kaurene synthase B)	ent-kaurene synthase B
MZ00026785	17	x		Os06g0228200 (NOD26-like membrane intrinsic protein2)	aquaporin NIP2-2
MZ00019090	17	x		pip2-5 (plasma membrane intrinsic protein)	plasma membrane intrinsic protein
MZ00024317	18			AT3G10185 (LOC100282417)	gibberellin-responsive protein, putative		membrane
MZ00019675	18			AT3G54500 (hypothetical protein LOC100275614)
MZ00015395	18			AT4G40042 (LOC100285983)	signal peptidase
MZ00018836	18	x		ATNUDT8 (hypothetical protein LOC100194205)	hydrolase		plastid
MZ00028419	18	x		BZO2H3 (LOC100275351)	BZO2H3 (basic leucine zipper O2 homolog 3); DNA binding / transcription factor	BZO2H3 (basic leucine zipper O2 homolog 3); DNA binding / transcription factor
MZ00022960	18			CDF1 (hypothetical protein LOC100193013)	CDF1 (CYCLING DOF FACTOR 1);	CDF1 (CYCLING DOF FACTOR 1);
MZ00027387	18			F20D10.90 (LOC100281336)	mannitol dehydrogenase, putative
MZ00016061	18			fad8 (fatty acid desaturase8)	FAD8 (FATTY ACID DESATURASE 8); omega-3 fatty acid desaturase
MZ00004614	18			gpm334 (LOC100279907)	GPT1; antiporter/ glucose-6-phosphate transmembrane transporter
MZ00016243	18	x		HSP70 (heat shock cognate 70 kDa protein 2)	HSP70 (heat shock protein 70); ATP binding
MZ00024131	18		x	LHB1B2 (chlorophyll a-b binding protein 6A)	LHB1B2 (Photosystem II light harvesting complex gene 1.5)		plastid
MZ00036529	18		x	LHCB3 (chlorophyll a-b binding protein of LHCII type III)	LHCB3 (LIGHT-HARVESTING CHLOROPHYLL BINDING PROTEIN 3)
MZ0004269	18			LOC100191232 (hypothetical protein LOC100191232)
MZ00043988	18			LOC100275405 (hypothetical protein LOC100275405)
MZ00013329	18			LOC100278356 (hypothetical protein LOC100278356)	myb family transcription factor	myb family transcription factor
MZ00055644	18			LOC100278903 (hypothetical protein LOC100278903)
MZ00005415	18			LOC100280895 (receptor-like serine-threonine protein kinase)	CRK10 (CYSTEINE-RICH RLK10); ATP binding / kinase/ protein kinase/ protein serine/threonine kinase/ protein tyrosine kinase
MZ00028829	18			LOC100381457 (hypothetical protein LOC100381457)	ankyrin repeat family protein
MZ00018702	18			LOC100383888 (hypothetical protein LOC100383888)
MZ00016351	18			LOC541713 (LOC541713)
MZ00018964	18	x		LOC541887 (plasma membrane intrinsic protein1)	plasma membrane integral protein ZmPIP1-6
MZ00026735	18	x		LOC606403 (galactinol synthase 1)	UDP-galactose:myo-inositol galactosyltransferase
MZ00022741	18	x		MNF13.2 (hypothetical protein LOC100303883)
MZ00016722	18			Os03g0140700 (LOC100277637)
MZ00015471	18			Os05g0244500 (cellulase containing protein)	cellulase containing protein
MZ00020716	18			Os10g0525800 (glutathione S-transferase GST 34)	glutathione S-transferase GST 34
MZ00055903	18			pco145004 (LOC100286235)	chaperone protein dnaJ-related
MZ00015603	18	x	x	PRR7 (hypothetical protein LOC100280240)	PRR7 (PSEUDO-RESPONSE REGULATOR 7);
MZ00022270	18			si496006g11 (LOC100283705)	SOS3 (SALT OVERLY SENSITIVE 3); calcium ion binding / calcium-dependent protein serine/threonine phosphatase
MZ00035373	18			T28M21.14 (AER)	transferase family protein
MZ00001082	18			T3F17.14 (hypothetical protein LOC100279397	delta-8 sphingolipid desaturase, putative		membrane
MZ00020188	19	x		AT3G48240 (octicosapeptide/Phox/Bem1p)	octicosapeptide/Phox/Bem1p (PB1) domain-containing protein
MZ00024310	19			AT3G56290 (LOC100275213)
MZ00040541	19	x		CCR2 (cinnamoyl CoA reductase1)	CCR1 (CINNAMOYL COA REDUCTASE 1); cinnamoyl-CoA reductase
MZ00006024, MZ00020826	19	x		CDF2 (hypothetical protein LOC100276261)	CDF2 (CYCLING DOF FACTOR 2); DNA binding / protein binding / transcription factor	CDF2 (CYCLING DOF FACTOR 2); DNA binding / protein binding / transcription factor
MZ00027918	19	x		F6D8.19 (LOC100281509)
MZ00044441, MZ00044460	19			GOLS3 (galactinol synthase2	AtGolS1 (Arabidopsis thaliana galactinol synthase 1); transferase, transferring glycosyl groups / transferase, transferring hexosyl groups
MZ00056649	19			LOC100274648 (hypothetical protein LOC100274648)
MZ00021932	19			LOC100274716 (hypothetical protein LOC100274716)
MZ00056758	19			MUB3.18 (U-box domain containing protein)	U-box domain-containing protein
MZ00022969	19			Os01g0111700
MZ00000473	19			Os01g0800500 (nucleotide pyrophosphatase/phosphodiesterase)
MZ00035945	19			Os05g0177500 (hypothetical protein LOC100191964)			plastid
MZ00005811	19			Os09g0422000 (anthranilate N-benzoyltransferase protein 1
MZ00016732	19	x		PIP2B (plasma membrane intrinsic protein2)	PIP2B (PLASMA MEMBRANE INTRINSIC PROTEIN 2); water channel
MZ00022293	19			RD22 (hypothetical protein LOC100194238)	RD22; nutrient reservoir
MZ00037480	19	x		T16L4.40 (LOC100281893)	2,3-diketo-5-methylthio-1-phosphopentane phosphatase family
MZ00035816	19	x		T31P16.160 (inositol-3-phosphate synthase-like)	MIPS2 (MYO-INOSITOL-1-PHOSTPATE SYNTHASE 2); binding / catalytic/ inositol-3-phosphate synthase
MZ00044798	20			AT3G51960 (LOC100273140)	bZIP family transcription factor	bZIP family transcription factor	nucleus
MZ00033123	20			AT3G57990 (hypothetical protein LOC100194067)
MZ0001149	20			ATS1 (glycerol-3-phosphate acyltransferase)	ATS1; glycerol-3-phosphate O-acyltransferase
MZ00016401	20			BMY7 (LOC100281767) beta-amylase	BAM1 (BETA-AMYLASE 1); beta-amylase
MZ00035652	20			F15M4.2 (hypothetical protein LOC100275981)
MZ00039138	20			F4D11.40 (VHS and GAT domain protein)	protein transporter		golgi
MZ00030201	20			F4I1.32 (hypothetical protein LOC100277804	p21Cip1-binding protein-related		mitochondrion
MZ00013339	20			H4C14 (histone H4)	HIS4; DNA binding	H4C14 (histone H4)
MZ00036389	20	x		HEMA1 (hypothetical protein LOC100193466	HEMA1; glutamyl-tRNA reductase		plastid
MZ00004193	20			HYH (transcription factor HY5)	HY5 (ELONGATED HYPOCOTYL 5); DNA binding / double-stranded DNA binding / transcription factor	HYH (transcription factor HY5)
MZ00026325	20			IDP225 (LOC100276055)
MZ00055741	20	x		IDP2462 (LOC100284344	ATPLT5 (POLYOL TRANSPORTER 5); D-ribose transmembrane transporter/ D-xylose transmembrane transporter/ carbohydrate transmembrane transporter/ galactose transmembrane transporter/ glucose transmembrane transporter/ glycerol transmembrane transporter/
MZ00018920	20			LOC100191961 (hypothetical protein LOC100191961)	phosphatidate-sterol O-acyltransferase/ phosphatidylcholine-sterol O-acyltransferase/ phosphatidylethanolamine-sterol O-acyltransferase
MZ00037146	20			LOC100193619 (hypothetical protein LOC100193619
MZ00024427	20			LOC100272260 (hypothetical protein LOC100272260)
MZ00029804, MZ00050433	20			LOC100273107 (hypothetical protein LOC100273107)	zinc finger (MYND type) family protein / F-box family protein	zinc finger (MYND type) family protein / F-box family protein
MZ00032172	20			LOC100275246 (hypothetical protein LOC100275246)
MZ00017235	20			LOC100277944 (hypothetical protein LOC100277944)
MZ00025903	20	x		LOC100280875 (nitric oxide synthase interacting protein)	phosphoinositide binding
MZ00032512	20	x		MLO6 (barley mlo defense gene homolog1)	MLO12 (MILDEW RESISTANCE LOCUS O 12); calmodulin binding		membrane
MZ00031087	20			Os03g0675300 (hypothetical protein LOC100274643)
MZ00001706	20			Os06g0121800 (hypothetical protein LOC100216735
MZ00024809	20			RNR2A (ribonucleoside-diphosphate reductase small chain	TSO2 (TSO meaning 'ugly' in Chinese); oxidoreductase/ ribonucleoside-diphosphate reductase/ transition metal ion binding
MZ00037958	20			T22F8.180 (hypothetical protein LOC100194117)	phenylalanyl-tRNA synthetase, putative / phenylalanine--tRNA ligase, putative
MZ00023500	21			APX1 (APx1 - Cytosolic Ascorbate Peroxidase)	APX1 (ascorbate peroxidase 1); L-ascorbate peroxidase
MZ00056889	21			AT3G07790 (DGCR14 protein)	DGCR14-related		plastid
MZ00014806	21			AT3G29075 (LOC100191540)	40S ribosomal protein S10 (RPS10A)
MZ00037072	21			CESA8 (cellulose synthase 11)	IRX1 (IRREGULAR XYLEM 1); cellulose synthase/ transferase, transferring glycosyl groups		membrane
MZ00016659	21			CHR11	CHR17 (CHROMATIN REMODELING FACTOR17); ATP binding / DNA binding / DNA-dependent ATPase/ helicase/ hydrolase, acting on acid anhydrides, in phosphorus-containing anhydrides / nucleic acid binding / nucleosome binding	CHR17 (CHROMATIN REMODELING FACTOR17); ATP binding / DNA binding / DNA-dependent ATPase/ helicase/ hydrolase, acting on acid anhydrides, in phosphorus-containing anhydrides / nucleic acid binding / nucleosome binding
MZ00024334	21	x		EMB2755 (LOC100281485)	SYNC1; ATP binding / aminoacyl-tRNA ligase/ asparagine-tRNA ligase/ aspartate-tRNA ligase/ nucleic acid binding / nucleotide binding
MZ00044395	21			F27F5.18 (hypothetical protein LOC100384600)	tetrapyrrole methylase family protein		mitochondrion
MZ00042873	21	x		LOC100194360 (hypothetical protein LOC100194360)	SAM1 (S-ADENOSYLMETHIONINE SYNTHETASE 1); methionine adenosyltransferase
MZ00021000	21			LOC100277448 (hypothetical protein LOC100277448)
MZ00018785	21			LOC100281374 (speckle-type POZ protein)	ATBPM1 (BTB-POZ and MATH domain 1); protein binding
MZ00042916	21			LOC100285887 (APx1 - Cytosolic Ascorbate Peroxidase)	APX1 (ascorbate peroxidase 1); L-ascorbate peroxidase
MZ00024684	21	x		LOC100381910 (hypothetical protein LOC100381910)	CB5-B (CYTOCHROME B5 ISOFORM B); heme binding
MZ00004343	21			LOC100382358 (hypothetical protein LOC100382358)
MZ00016659	21			LOC100383756 (hypothetical protein LOC100383756)	SKB1 (SHK1 BINDING PROTEIN 1); protein methyltransferase
MZ00021055	21			LOC100384231 (hypothetical protein LOC100384231)	PAL2; phenylalanine ammonia-lyase
MZ00019360	21			Os01g0257100 (LOC100285535)
MZ00034406	21			Os01g0591300 (aldehyde dehydrogenase5)	ALDH2C4; 3-chloroallyl aldehyde dehydrogenase/ aldehyde dehydrogenase (NAD)/ coniferyl-aldehyde dehydrogenase
MZ00041057	21			Os01g0764000 (glutathione-S-transferase1)	ATGSTF13; glutathione transferase
MZ00037365	21			Os04g0640600 (hypothetical protein LOC100191326)	shikimate kinase, putative
MZ00018517	21			Os06g0214800 (LOC100283424)
MZ00032181	21			Os09g0433000 (hypothetical protein LOC100194243	transferase, transferring glycosyl groups
MZ00014292	21			pal1 (phenylalanine ammonia lyase1)
MZ00057198	21			si606029c09(535) (LOC100194169)	YDA (YODA); ATP binding / kinase/ protein kinase/ protein serine/threonine kinase
MZ00021751	21			T16L4.40 (LOC100281893)	2,3-diketo-5-methylthio-1-phosphopentane phosphatase family
MZ00043018	21			TUB7 (beta-5 tubulin)	TUB8; structural constituent of cytoskeleton
MZ00056403	21			UBC28 (hypothetical protein LOC100192585)	ubiquitin-conjugating enzyme, putative
MZ00017590	22			ANAC079/ANAC080/ATNAC4 (GRAB2 protein)	ANAC080 (ARABIDOPSIS NAC DOMAIN CONTAINING PROTEIN 80); transcription factor	ANAC080 (ARABIDOPSIS NAC DOMAIN CONTAINING PROTEIN 80); transcription factor
MZ00051801	22			AP22.24 (SANT/MYB protein)		AP22.24 (SANT/MYB protein)
MZ0005891	22			AT2G36305 (hypothetical protein LOC100192945)	FACE2 (FARNESYLATED PROTEIN-CONVERTING ENZYME 2); endopeptidase
MZ00013224, MZ00014930, MZ00036554, MZ00041741	22			AT3G10420	sporulation protein-related		plastid
MZ00019390	22			AT3G14200 (hypothetical protein LOC100192597)	DNAJ heat shock N-terminal domain-containing protein
MZ00052209	22			AT3G23700 (RNA binding S1)	S1 RNA-binding domain-containing protein		plastid
MZ00043406	22			AT3G56290 (LOC100275213)
MZ00025518	22			AT4G10265 (LOC100282066)
MZ00004381	22			BZO2H3 (LOC100275351
MZ00024565	22	x		CIPK17 (protein kinase-like)	CIPK1 (CBL-INTERACTING PROTEIN KINASE 1); kinase/ protein binding
MZ00051312	22			CYP76C7 (hypothetical protein LOC100273519)
MZ00005164	22			F13K3.18 (cytokinin-O-glucosyltransferase 1)
MZ00001029	22			F16A16.190 (hypothetical protein LOC100191554)	AMT1;1 (AMMONIUM TRANSPORTER 1;1); ammonium transmembrane transporter		membrane
MZ00022737, MZ00042771	22			F19K23.17 (hypothetical protein LOC100277758)
MZ00005059	22			F22D22.10 (hypothetical protein LOC100217049)	haloacid dehalogenase-like hydrolase family protein
MZ00030889	22			F26F24.26 (hypothetical protein LOC100275866)
MZ00015910	22			F7A19.32 (LOC100192110)	RNS3 (RIBONUCLEASE 3); RNA binding / endoribonuclease/ ribonuclease T2		membrane
MZ00037459	22	x		F9H3.2 (mpv17 / PMP22 family protein)	peroxisomal membrane protein-related		plastid
MZ00024359	22			gtr1 (glutamyl-tRNA reductase1)	HEMA1; glutamyl-tRNA reductase
MZ00020033	22			K24M7.6	meprin and TRAF homology domain-containing protein / MATH domain-containing protein
MZ00004939	22			K2A18.15 (RING-H2 finger protein ATL2B)	zinc finger (C3HC4-type RING finger) family protein	zinc finger (C3HC4-type RING finger) family protein	plastid
MZ00043787	22			LOC100191597 (hypothetical protein LOC100191597) wound induced protein
MZ00037366	22			LOC100191777 (hypothetical protein LOC100191777)	RNA binding / nucleic acid binding / nucleotide binding
MZ00014994	22			LOC100192556 (hypothetical protein LOC100192556	short-chain dehydrogenase/reductase (SDR) family protein
MZ00051903	22			LOC100193618 (hypothetical protein LOC100193618)
MZ0001292	22			LOC100193793 (hypothetical protein LOC100193793)	leucine-rich repeat transmembrane protein kinase, putative
MZ00021254	22			LOC100216819 (hypothetical protein LOC100216819)
MZ00057405	22			LOC100279001 (hypothetical protein LOC100279001)
MZ00013951	22			LOC100279700 (hypothetical protein LOC100279700)	C2 domain-containing protein
MZ00030229	22			LOC100281289 (CONSTANS-like protein CO5)	zinc finger (B-box type) family protein	LOC100281289 (CONSTANS-like protein CO5)
MZ00024420	22			LOC100281467 (CIPK-like protein 1)	protein kinase family protein / NAF domain-containing protein
MZ00031098	22			LOC100282721 (prenyl transferase)	SPS1 (solanesyl diphosphate synthase 1); trans-octaprenyltranstransferase
MZ00030925	22			LOC100284503 (electron carrier/ electron transporter/ iron ion binding protein)	ferredoxin-related
MZ00039589	22	x		LOC100381910 (hypothetical protein LOC100381910)	CB5-B (CYTOCHROME B5 ISOFORM B); heme binding
MZ00004335	22			LOC100382358 (hypothetical protein LOC100382358)
MZ00021679, MZ00051791	22			LOC100384229 (hypothetical protein LOC100384229)
MZ00042673	22			LOC100384501 (hypothetical protein LOC100384501)	PSB28 (PHOTOSYSTEM II REACTION CENTER PSB28 PROTEIN)
MZ00016104	22			LOC100384717 (hypothetical protein LOC100384717)	NIR1 (NITRITE REDUCTASE 1); ferredoxin-nitrate reductase/ nitrite reductase (NO-forming)
MZ00032043	22			LOC100500708 (anthranilic acid methyltransferase 3)
MZ00019868	22			MJJ3.20 (SANT/MYB protein)		MJJ3.20 (SANT/MYB protein)
MZ00022897	22			Os01g0346700 (hypothetical protein LOC100193876)
MZ00039718	22			Os01g0878400 (hypothetical protein LOC100382244)	AAP8; amino acid transmembrane transporter
MZ00001792	22			Os02g0185200 (hypothetical protein LOC100382160)
MZ00015575	22			Os02g0771400 (tyrosine specific protein phosphatase family protein)	tyrosine specific protein phosphatase family protein
MZ00030744	22			Os03g0707200 (integral membrane protein DUF6 containing protein)			membrane
MZ00031592	22			Os04g0450000 (hypothetical protein LOC100276596)
MZ00003809	22			Os05g0170800 (uvrB/uvrC motif family protein)
MZ00024639	22			Os05g0278500 (LOC100285022)
MZ00000925	22			Os06g0272800 (hypothetical protein LOC100276538)
MZ00022358	22			Os06g0677000 (hypothetical protein LOC100274476)			plastid
MZ00030879	22	x		Os06g0716100 (chaperone protein dnaJ 11)			plastid
MZ00028951	22			Os07g0443500 (SANT/MYB protein)		Os07g0443500 (SANT/MYB protein)
MZ00022622	22			Os07g0630900	ATCSLA02; mannan synthase/ transferase, transferring glycosyl groups
MZ00001887	22			Os07g0656500 (hypothetical protein LOC100382191)	GUN5 (GENOMES UNCOUPLED 5); magnesium chelatase
MZ00004787	22			Os08g0425500 (hypothetical protein LOC100192520)	endonuclease/exonuclease/phosphatase family protein
MZ00030717	22			OsCAO1 (hypothetical protein LOC100274228)	CH1 (CHLORINA 1); chlorophyllide a oxygenase		plastid
MZ00000985	22			pco094376 (LOC100280553)	RAP2.4 (related to AP2 4); DNA binding / transcription factor	RAP2.4 (related to AP2 4); DNA binding / transcription factor
MZ00023948	22			PSAK (photosystem I reaction center6)	PSAK (photosystem I subunit K)		plastid
MZ00031051	22			sat2 (serine acetyltransferase2)	ATSERAT1;1 (ARABIDOPSIS THALIANA SERINE ACETYLTRANSFERASE 1;1); serine O-acetyltransferase
MZ00037306	22			T19N18.110 (hypothetical protein LOC100273465)
MZ00012923	22			T1E2.5 (hypothetical protein LOC100304289)	aspartyl protease family protein
MZ00038936	22			T6P5.12 (LOC100279250)	subtilase family protein		membrane
MZ00015576	22			T7A14.14 (LOC100285379)	tyrosine specific protein phosphatase family protein
MZ00020111	23	x		4CL3 (hypothetical protein LOC100280100)	4-coumarate--CoA ligase, putative / 4-coumaroyl-CoA synthase, putative
MZ00041657	23			ACC1 (acetyl-coenzyme A carboxylase)	ACC1 (ACETYL-COENZYME A CARBOXYLASE 1); acetyl-CoA carboxylase
MZ00037812	23			ACT2 (LOC100284092)	ACT11 (actin-11); structural constituent of cytoskeleton
MZ00044059	23			ALDH2C4 (cytosolic aldehyde dehydrogenase RF2C)	ALDH2C4; 3-chloroallyl aldehyde dehydrogenase/ aldehyde dehydrogenase (NAD)/ coniferyl-aldehyde dehydrogenase
MZ00014364	23	x		AP22.71 (LOC542099)	COR413-PM2 (COLD-REGULATED 413-PLASMA MEMBRANE 2)
MZ00021951	23			APRL2 (adenosine 5'-phosphosulfate reductase-like2)	APR3 (APS REDUCTASE 3); adenylyl-sulfate reductase
MZ00024791	23			APS2 (bifunctional 3-phosphoadenosine 5-phosphosulfate synthetase 2)	APS3; sulfate adenylyltransferase (ATP)		plastid
MZ00030811	23	x		AT1G03905 (ATP-dependent transporter YFL028C)	ABC transporter family protein
MZ00027024	23			AT2G25620 (hypothetical protein LOC100193064)	protein phosphatase 2C, putative / PP2C, putative
MZ00028220	23			AT2G26800 (hypothetical protein LOC100193689)	hydroxymethylglutaryl-CoA lyase, putative / 3-hydroxy-3-methylglutarate-CoA lyase, putative / HMG-CoA lyase, putative		mitochondrion
MZ00022253	23			AT3G12210 (LOC100278543)	sequence-specific DNA binding
MZ00003808	23			AT3G15090 (reticulon-4-interacting protein 1)	oxidoreductase, zinc-binding dehydrogenase family protein
MZ00057095	23	x		AT3G15430 (hypothetical protein LOC100382481)	regulator of chromosome condensation (RCC1) family protein	regulator of chromosome condensation (RCC1) family protein
MZ00049514	23			AT3G19553 (cationic amino acid transporter)	amino acid permease family protein
MZ00026147	23			AT5G12310 (LOC100282180)	zinc finger (C3HC4-type RING finger) family protein	zinc finger (C3HC4-type RING finger) family protein
MZ00015733	23			AT5G12380 (hypothetical protein LOC100193535)	ANN5; calcium ion binding / calcium-dependent phospholipid binding
MZ00013299	23			ATCP1 (caltractin)
MZ00013988	23	x		ATNUDT4 (LOC100280971)	atnudt16 (Arabidopsis thaliana Nudix hydrolase homolog 16); hydrolase
MZ00018654	23			ATPK2 (LOC100281573)	S6K2 (ARABIDOPSIS THALIANA SERINE/THREONINE PROTEIN KINASE 2); kinase/ protein kinase
MZ00001429	23			ATR2 (hypothetical protein LOC100304425)	ATR2 (ARABIDOPSIS P450 REDUCTASE 2); NADPH-hemoprotein reductase		plastid
MZ00043853	23	x		ATRBP47C (hypothetical protein LOC100191587)	ATRBP47C' (RNA-binding protein 47C'); RNA binding
MZ00035642	23			AUR2 (hypothetical protein LOC100191291)	AtAUR1 (ATAURORA1); histone kinase(H3-S10 specific) / kinase/ protein serine/threonine kinase
MZ00031399	23			AW225120 (LOC100383337)
MZ00027220	23			BGAL8 (hypothetical protein LOC100279948)	BGAL8 (beta-galactosidase 8); beta-galactosidase/ catalytic/ cation binding / sugar binding		membrane
MZ00022177	23			CAD1 (MAC/Perforin domain containing protein)	CAD1 (constitutively activated cell death 1)
MZ00047689	23			cbp1 (calmodulin binding protein1)	calmodulin-binding protein
MZ00044081	23			CHS (chalcone synthase)	TT4 (TRANSPARENT TESTA 4); naringenin-chalcone synthase
MZ00044786	23			CKL7 (casein kinase I isoform delta-like)	ADK1 (dual specificity kinase 1); kinase/ protein serine/threonine/tyrosine kinase
MZ00013602	23			cl12356_1 (LOC100274310)	serine/threonine protein phosphatase, putative
MZ00019244	23			cl2945_1 (LOC100272486)	L-asparaginase, putative / L-asparagine amidohydrolase, putative
MZ00019081	23			cl7341_1a (LOC100273729)	SOUL heme-binding family protein
MZ00039208	23			cl7341_1a (LOC100273729)	SOUL heme-binding family protein
MZ00027637	23			CLC-C (LOC542114)	CLC-C (CHLORIDE CHANNEL C); anion channel/ voltage-gated chloride channel
MZ00015406	23			csu31a (LOC100283885)
MZ00032902	23			DCL3 (hypothetical protein LOC100279204)	ribonuclease III family protein
MZ00023304	23			DGD2 (hypothetical protein LOC100382823)	DGD2; UDP-galactosyltransferase/ UDP-glycosyltransferase/ digalactosyldiacylglycerol synthase/ transferase, transferring glycosyl groups		plastid
MZ00027680	23			DIS2 (LOC100282664)	DIS2 (DISTORTED TRICHOMES 2); structural molecule
MZ00055582	23			DL4555W (hypothetical protein LOC100217019)	UGLYAH (UREIDOGLYCINE AMINOHYDROLASE); transcription factor	UGLYAH (UREIDOGLYCINE AMINOHYDROLASE); transcription factor	membrane
MZ00051978	23			DRT101	DRT101 (DNA-DAMAGE-REPAIR/TOLERATION 101); intramolecular transferase, phosphotransferases / magnesium ion binding
MZ00031292	23			F11C18.20 (signal transducer)	ENP (ENHANCER OF PINOID); protein binding / signal transducer
MZ00028974	23			F11F19.19 (mal d 1-associated protein)
MZ00027319	23			F11F19.26 (LOC100279019)
MZ00030624	23			F13E7.14 (LOC100383127)
MZ00037001	23			F13K23.22 (LOC100274530)	RPL27AB; structural constituent of ribosome
MZ00007592	23			F13M7.24 (hypothetical protein LOC100274072)	male sterility MS5 family protein
MZ00014704	23			F13P17.33 (3-beta hydroxysteroid dehydrogenase/isomerase)	flavin reductase-related		plastid
MZ00043883, MZ00056907	23			F13P17.5	structural constituent of ribosome / transcription elongation regulator/ transcription initiation factor	structural constituent of ribosome / transcription elongation regulator/ transcription initiation factor
MZ00012669	23			F14D16.30 (ubiquinone biosynthesis protein COQ9)			mitochondrion
MZ00022277	23			F14G6.17 (LOC100274085)	chlorophyll A-B binding family protein
MZ00038513	23	x		F14G9.16 (hypothetical protein LOC100192913)
MZ00024604	23			F14P1.24 (LOC100274177)
MZ00004840	23			F15H21.12 (hypothetical protein LOC100272581)
MZ00029165	23			F15M7.6 (hypothetical protein LOC100216600)	ABC transporter family protein
MZ00026795	23			F16J13.70 (hypothetical protein LOC100276030)
MZ0006065	23			F17I14.140 (hypothetical protein LOC100383251)	loricrin-related
MZ00057185	23			F19K19.11 (beta-1,4-mannosyltransferase)	glycosyl transferase family 1 protein		mitochondrion
MZ00015010, MZ00035881, MZ00039795	23	x		F1M20.15 (LOC100283007)	geranylgeranyl reductase		plastid
MZ00019781	23			F1N21.23 (exostosin-like)	exostosin family protein		membrane
MZ00000542	23			F1O19.19 (LOC100191162)
MZ00043135	23			F21B23.110 (hypothetical protein LOC100191715)	LHCA2; chlorophyll binding
MZ00019632	23			F21C20.130 (LOC100382070)	calcium-binding protein, putative
MZ00019044	23			F21E1.40 (phosphoglycerate mutase gpmB)	phosphoglycerate/bisphosphoglycerate mutase family protein
MZ00016714	23			F21M12.22 (hypothetical protein LOC100383422)	phosphoribosylamine--glycine ligase (PUR2)		plastid
MZ00017043	23			F22K18.230 (mitochondrionondrial 2-oxoglutarate/malate carrier protein)	UCP5 (UNCOUPLING PROTEIN 5); binding		mitochondrion
MZ00019759	23			F23A5.7 (mitochondrionondrial glycoprotein)
MZ00031189	23			F25E4.190 (LOC100285779)	haloacid dehalogenase-like hydrolase family protein
MZ00025188	23			F26B6.12 (LOC100277253)	emb1879 (embryo defective 1879)
MZ00055406	23			F27C12.22 (tsi1-interacting protein TSIP1	chaperone protein dnaJ-related
MZ00001239	23			F2J10.10 (tubulin alpha-6 chain)
MZ00028561	23			F2P16.6 (hypothetical protein LOC100381783)	ATIREG3 (IRON-REGULATED PROTEIN 3)		plastid
MZ00027177	23	x		F3C3.2 (hypothetical protein LOC100274377)	binding / catalytic/ coenzyme binding		plastid
MZ00047597	23			F3G5.3 (hypothetical protein LOC100278941)
MZ00050250	23			F3L12.9 (hypothetical protein LOC100272941)	MATE efflux family protein		membrane
MZ00032160, MZ00048329	23			F3L17.100 (hypothetical protein LOC100381586)	binding / catalytic		plastid
MZ00027145	23			F4D11.40 (VHS and GAT domain protein)	protein transporter		golgi
MZ00033511	23			F7H1.15 (hypothetical protein LOC100193474)	mannitol transporter, putative		membrane
MZ00026954	23			F7P12.5 (embryogenesis-associated protein EMB8)	esterase/lipase/thioesterase family protein
MZ00039216, MZ00039387	23			fad8 (fatty acid desaturase8)	FAD8 (FATTY ACID DESATURASE 8); omega-3 fatty acid desaturase
MZ00001045, MZ00016877	23			FTSH7 (hypothetical protein LOC100273697)	ftsh7 (FtsH protease 7); ATP-dependent peptidase/ ATPase/ metallopeptidase
MZ00026965, MZ00026966, MZ00038988	23			gpm291 (LOC100193294)	AST68; sulfate transmembrane transporter
MZ00017753	23			gst5 (glutathione transferase5)	ATGSTU25 (GLUTATHIONE S-TRANSFERASE TAU 25); glutathione transferase
MZ00015249	23			gst7 (glutathione transferase7)	ATGSTU8 (GLUTATHIONE S-TRANSFERASE TAU 8); glutathione transferase
MZ00057303	23			his1a (histone1a)	histone H1, putative	his1a (histone1a)
MZ00030695	23			JAC1 (hypothetical protein LOC100278637)
MZ00016344, MZ00056336	23	x		K18G13.4 (hypothetical protein LOC100274389)	CP5
MZ00044150	23			K9P8.2 (LOC100285392)	mitotic checkpoint family protein
MZ00032094	23			KCS1 (LOC100286157)	KCS1 (3-KETOACYL-COA SYNTHASE 1); acyltransferase/ fatty acid elongase		membrane
MZ00014805	23			Lhcb5-2 (chlorophyll a/b-binding apoprotein CP26 precursor)	LHCB5 (LIGHT HARVESTING COMPLEX OF PHOTOSYSTEM II 5); chlorophyll binding
MZ00040220	23	x	x	lhcb7 (light harvesting complex mesophyll7)	LHB1B2; chlorophyll binding
MZ00018671	23			LOC100037752 (LOC100037752)	NHX2 (SODIUM HYDROGEN EXCHANGER 2); sodium ion transmembrane transporter/ sodium:hydrogen antiporter
MZ00050389	23			LOC100101526 (starch synthase IIb-2 precursor)	AtSS2 (starch synthase 2); transferase, transferring glycosyl groups
MZ00044463	23			LOC100127536 (AN18)	zinc finger (AN1-like) family protein	zinc finger (AN1-like) family protein
MZ00043498	23			LOC100191328 (hypothetical protein LOC100191328)	FAD2 (FATTY ACID DESATURASE 2); delta12-fatty acid dehydrogenase/ omega-6 fatty acid desaturase
MZ00016381	23			LOC100191363 (hypothetical protein LOC100191363)	SEC14 cytosolic factor (SEC14) / phosphoglyceride transfer protein
MZ00030699	23			LOC100191502 (hypothetical protein LOC100191502)	scpl2 (serine carboxypeptidase-like 2); serine-type carboxypeptidase
MZ00043134	23			LOC100192053 (hypothetical protein LOC100192053)	LHCA2; chlorophyll binding
MZ00032477	23			LOC100192544 (hypothetical protein LOC100192544)	WD-40 repeat family protein	WD-40 repeat family protein
MZ00040300, MZ00056480	23			LOC100192641 (hypothetical protein LOC100192641)
MZ00015363	23			LOC100192897 (hypothetical protein LOC100192897)	ADF4 (ACTIN DEPOLYMERIZING FACTOR 4); actin binding
MZ00026906	23			LOC100193717 (hypothetical protein LOC100193717)
MZ00042483	23			LOC100193819 (hypothetical protein LOC100193819)	lipase class 3 family protein
MZ00042885	23			LOC100194153 (hypothetical protein LOC100194153)	LTP-like protein
MZ00030623	23	x		LOC100194306 (hypothetical protein LOC100194306	DNAJ heat shock family protein
MZ00022992	23			LOC100217230 (hypothetical protein LOC100217230)
MZ00029064	23			LOC100217290 (hypothetical protein LOC100217290)	RNA recognition motif (RRM)-containing protein
MZ00039578	23			LOC100217303 (hypothetical protein LOC100217303)	ACT7 (ACTIN 7); structural constituent of cytoskeleton
MZ00026554	23	x		LOC100272439 (hypothetical protein LOC100272439)	carbonic anhydrase family protein / carbonate dehydratase family protein		plastid
MZ00040914	23			LOC100273118 (hypothetical protein LOC100273118)	40S ribosomal protein S3A (RPS3aA)
MZ00025697	23			LOC100273327 (hypothetical protein LOC100273327)	glycolipid binding / glycolipid transporter
MZ00018046	23			LOC100273871 (hypothetical protein LOC100273871
MZ00018305	23			LOC100274279 (hypothetical protein LOC100274279)	NHX1 (NA+/H+ EXCHANGER); protein binding / sodium ion transmembrane transporter/ sodium:hydrogen antiporter
MZ00044770	23			LOC100274312 (hypothetical protein LOC100274312)	AtSIP1 (Arabidopsis thaliana seed imbibition 1); hydrolase, hydrolyzing O-glycosyl compounds
MZ00033225	23			LOC100274993 (hypothetical protein LOC100274993)
MZ00042487	23	x		LOC100275150 (hypothetical protein LOC100275150)
MZ00018620	23			LOC100275345 (hypothetical protein LOC100275345)
MZ0001232	23			LOC100275474 (hypothetical protein LOC100275474)
MZ00044464	23			LOC100277380 (hypothetical protein LOC100277380)
MZ00017259	23			LOC100278868 (hypothetical protein LOC100278868)
MZ00020019	23			LOC100279302 (hypothetical protein LOC100279302)
MZ00040471, MZ00044622	23			LOC100279437 (hypothetical protein LOC100279437)	NQR (NADPH:QUINONE OXIDOREDUCTASE); FMN reductase
MZ00036811	23			LOC100279457 (hypothetical protein LOC100279457)	STP1 (SUGAR TRANSPORTER 1); carbohydrate transmembrane transporter/ sugar:hydrogen symporter
MZ00056906	23			LOC100279740 (hypothetical protein LOC100279740)	ubiquitin-conjugating enzyme family protein
MZ00042444	23			LOC100279845 (hypothetical protein LOC100279845)	1-phosphatidylinositol phosphodiesterase-related
MZ00028666	23			LOC100280023 (hypothetical protein LOC100280023)
MZ00036645	23			LOC100280556 (60S ribosomal protein L27)	60S ribosomal protein L27 (RPL27C)		mitochondrion
MZ00042987	23			LOC100280562 (ADP-ribosylation factor 1)	ARF1A1C; GTP binding / phospholipase activator/ protein binding
MZ00056947	23			LOC100280745 (long cell-linked locus protein
MZ00026004	23			LOC100281048 (glucose-6-phosphate/phosphate translocator 2)	GPT1; antiporter/ glucose-6-phosphate transmembrane transporter
MZ00026525	23			LOC100281390 (SLT1 protein)	SLT1 (sodium- and lithium-tolerant 1)
MZ00049551	23			LOC100281763 (auxin efflux carrier component 6)	PIN5 (PIN-FORMED 5); auxin:hydrogen symporter/ transporter
MZ00020242	23	x		LOC100281883 (CONSTANS-like protein CO8)		LOC100281883 (CONSTANS-like protein CO8)
MZ00023381	23			LOC100281984 (Zn-finger, RanBP-type, containing protein)		LOC100281984 (Zn-finger, RanBP-type, containing protein)
MZ00028063	23			LOC100281989 (60S ribosomal protein L33-B)	60S ribosomal protein L35a (RPL35aC)
MZ00016324	23			LOC100282209 (O-methyltransferase ZRP4)
MZ00013916	23			LOC100282277 (actin-depolymerizing factor 6)	ADF6 (ACTIN DEPOLYMERIZING FACTOR 6); actin binding
MZ00043133	23			LOC100282512 (chlorophyll a-b binding protein)	LHCA2; chlorophyll binding
MZ00044429	23			LOC100282724 (DNA binding protein)
MZ00004722	23			LOC100283118 (RING-H2 finger protein ATL3B)
MZ00030493	23			LOC100283801 (ethylene-responsive transcription factor 3)		LOC100283801 (ethylene-responsive transcription factor 3)
MZ00027754	23			LOC100284620 (phloem-specific lectin)	AtPP2-B1 (Phloem protein 2-B1); carbohydrate binding
MZ00029392	23			LOC100285080 (PGR5)	PGR5 (proton gradient regulation 5); electron carrier
MZ00036260	23			LOC100285591 (NAD kinase 1)	NADK1 (NAD KINASE 1); NAD+ kinase/ NADH kinase/ calmodulin binding
MZ00030630	23			LOC100286253 (protein kinase domain containing protein)	protein kinase family protein
MZ00026852	23			LOC100304014 (hypothetical protein LOC100304014)	zinc finger protein-related
MZ00016449	23			LOC100304093 (hypothetical protein LOC100304093)
MZ00025555, MZ00036163	23			LOC100381315 (calmodulin)	CAM7 (CALMODULIN 7); calcium ion binding
MZ00056640	23			LOC100381344 (protochlorophyllide reductase A)	PORA; oxidoreductase/ protochlorophyllide reductase
MZ00028908	23			LOC100382407 (hypothetical protein LOC100382407)
MZ00055792	23			LOC100383489 (hypothetical protein LOC100383489)	AtbZIP44 (Arabidopsis thaliana basic leucine-zipper 44); DNA binding / protein heterodimerization/ transcription factor	AtbZIP44 (Arabidopsis thaliana basic leucine-zipper 44); DNA binding / protein heterodimerization/ transcription factor
MZ00022615	23			LOC100383539 (hypothetical protein LOC100383539)	zinc finger (C3HC4-type RING finger) family protein	zinc finger (C3HC4-type RING finger) family protein
MZ00055552	23			LOC100383819 (hypothetical protein LOC100383819)
MZ00027077	23			LOC100384501 (hypothetical protein LOC100384501)	PSB28 (PHOTOSYSTEM II REACTION CENTER PSB28 PROTEIN)
MZ00025733	23			LOC100384828 (hypothetical protein LOC100384828)	STOP1 (sensitive to proton rhizotoxicity 1); nucleic acid binding / transcription factor/ zinc ion binding	STOP1 (sensitive to proton rhizotoxicity 1); nucleic acid binding / transcription factor/ zinc ion binding
MZ00016108	23			LOC606467 (ustilago maydis induced8)	emb2742 (embryo defective 2742); CTP synthase/ catalytic
MZ00041803	23			LOL1 (LOC100285579)	LOL1 (LSD ONE LIKE 1); DNA binding
MZ00021039	23			LPAT3 (1-acyl-sn-glycerol-3-phosphate acyltransferase 4)	LPAT5; acyltransferase
MZ00019694	23			MAE1.11 (LOC100277821)	regulator of chromosome condensation (RCC1) family protein	regulator of chromosome condensation (RCC1) family protein	mitochondrion
MZ00026688	23			MAJ23.90 (LOC100216683)	binding / catalytic/ coenzyme binding
MZ00030226	23			MJB20.9 (hypothetical protein LOC100274474)	protein kinase family protein
MZ00016269	23			MKK5 (hypothetical protein LOC100383746)	ATMKK5 (ARABIDOPSIS THALIANA MITOGEN-ACTIVATED PROTEIN KINASE KINASE 5); MAP kinase kinase/ kinase		mitochondrion
MZ00018586, MZ00024189	23			MNF13.23 (LOC100283468)	PQ-loop repeat family protein / transmembrane family protein		membrane
MZ00016770	23			MNL12.8 (drought-induced protein 1)	chaperone protein dnaJ-related
MZ00043775	23			MSBP1 (membrane steroid-binding protein 1	ATMP2; heme binding		membrane
MZ00030973	23			NAC1 (NAC1 transcription factor)	ATAF2; transcription activator	NAC1 (NAC1 transcription factor)
MZ00019271	23			NDC1 (LOC100282489)	NDC1 (NAD(P)H dehydrogenase C1); NADH dehydrogenase		mitochondrion
MZ00043841	23			NFU1 (LOC100286236)	NFU1; structural molecule		plastid
MZ00026487	23			NUDT6 (LOC100192595	ATNUDT2 (ARABIDOPSIS THALIANA NUDIX HYDROLASE HOMOLOG 2); ADP-ribose diphosphatase/ NAD or NADH binding / hydrolase
MZ00031478	23			Os01g0178700 (hypothetical protein LOC100384053)	zinc finger (C3HC4-type RING finger) family protein
MZ00057330	23			Os01g0242600 (LOC100279497)
MZ00019920	23			Os01g0290700 (hypothetical protein LOC100382746)	ATNAP8; ATPase, coupled to transmembrane movement of substances / transporter
MZ0004548	23			Os01g0332500 (LOC100282195)	scpl33 (serine carboxypeptidase-like 33); serine-type carboxypeptidase
MZ00030012	23			Os01g0635400 (rae1-like protein)	transducin family protein / WD-40 repeat family protein
MZ00024044	23			Os01g0866500 (soluble inorganic pyrophosphatase)	AtPPa4 (Arabidopsis thaliana pyrophosphorylase 4); inorganic diphosphatase
MZ00044204	23	x		Os01g0949300 (calmodulin-like protein 1)
MZ00020127	23			Os02g0160200 (hypothetical protein LOC100274509)
MZ00040917	23			Os02g0287000 (40S ribosomal protein S3a)	40S ribosomal protein S3A (RPS3aA)
MZ00057172	23			Os02g0754800 (hypothetical protein LOC100276165)
MZ00004540	23			Os03g0227400 (LOC100280934)	glycosyl hydrolase family 17 protein
MZ00020441	23			Os03g0567100 (hypothetical protein LOC100277017)
MZ00027716	23			Os03g0765200 (peptidase/ serine-type peptidase)
MZ00029878	23			Os04g0136700 (hypothetical protein LOC100192993)
MZ00036917	23			Os04g0188500 (LOC100278001)
MZ00043647	23			Os04g0445700 (hypothetical protein LOC100280304)	FAB1 (FATTY ACID BIOSYNTHESIS 1); 3-oxoacyl-[acyl-carrier-protein] synthase/ fatty-acid synthase		plastid
MZ00018664	23			Os04g0449400 (catalytic/ protein phosphatase type 2C)	protein phosphatase 2C-related / PP2C-related		plastid
MZ00022003	23			Os04g0532100 (hypothetical protein LOC100217183)	short-chain dehydrogenase/reductase (SDR) family protein
MZ00013860	23			Os04g0549600 (dnaJ protein)	ATJ3; protein binding
MZ00012888	23			Os04g0660100 (LOC100275788)
MZ00035867	23			Os05g0208100 (protein kinase-like)	CIPK19 (CBL-INTERACTING PROTEIN KINASE 19); ATP binding / kinase/ protein kinase/ protein serine/threonine kinase
MZ00013304	23			Os05g0410500 (hypothetical protein LOC100274435)	proton-dependent oligopeptide transport (POT) family protein
MZ00000433	23			Os06g0109500 (hypothetical protein LOC100191686)	haloacid dehalogenase-like hydrolase family protein
MZ00040140	23			Os06g0488600	haloacid dehalogenase-like hydrolase family protein		membrane
MZ00035908	23			Os06g0590700 (hypothetical protein LOC100273588)
MZ00037219	23			Os06g0651000 (LOC100135421)
MZ00055357	23			Os06g0726400 (starch branching enzyme1)	SBE2.2 (starch branching enzyme 2.2); 1,4-alpha-glucan branching enzyme		plastid
MZ0005896	23			Os07g0148200 (hypothetical protein LOC100217238)
MZ00040585	23			Os07g0214900 (chalcone synthase)	TT4 (TRANSPARENT TESTA 4); naringenin-chalcone synthase
MZ00013752	23			Os07g0271000 (LOC100273017)	ATGDI1 (ARABIDOPSIS THALIANA GUANOSINE NUCLEOTIDE DIPHOSPHATE DISSOCIATION INHIBITOR 1); RAB GDP-dissociation inhibitor
MZ00016030	23			Os07g0418200 (hypothetical protein LOC100278673)
MZ00049682	23			Os08g0103000 (serine/threonine-protein kinase CTR1)	protein kinase family protein		plastid
MZ00019759	23			Os08g0104400 (LOC100279096)
MZ00048976	23			Os08g0425700 (annexin A4)	ANN5; calcium ion binding / calcium-dependent phospholipid binding
MZ00032760	23			Os08g0458200 (MTD1)
MZ00025746	23			Os09g0476000 (TMV-MP30 binding protein 2C)
MZ00027857	23			Os09g0512800 (snRK1-interacting protein 1)			plastid
MZ00023983	23	x		Os09g0538000 (knotted1 induced1)		Os09g0538000 (knotted1 induced1)
MZ00032212	23			Os10g0113900 (NAD(P)H-dependent oxidoreductase)	aldo/keto reductase, putative
MZ00018334	23	x		Os10g0132300 (LOC100192837)
MZ00014314	23			Os10g0497700 (brittle stalk-2-like protein 3)	COB (COBRA)
MZ00016342	23			Os11g0207000 (LOC100279192)	SEU (seuss); DNA binding / protein binding / protein heterodimerization/ transcription cofactor	SEU (seuss); DNA binding / protein binding / protein heterodimerization/ transcription cofactor	plastid
MZ00040604	23			Os11g0558200 (hypothetical protein LOC100384664)	MYB30 (MYB DOMAIN PROTEIN 30); DNA binding / transcription factor
MZ00052319	23			Os11g0614900 (hypothetical protein LOC100191550)
MZ00015713	23			Os12g0111400 (LOC100216770)
MZ00034397	23			pco067113e (LOC100192082)
MZ00037477	23			pco070432b (LOC100193816)	HTA10; DNA binding
MZ00042267	23			PCO071075 (PCO071075 protein)	AtPP2-A13 (Arabidopsis thaliana phloem protein 2-A13); carbohydrate binding
MZ00028082	23			pco094376 (LOC100280553)	RAP2.4 (related to AP2 4); DNA binding / transcription factor	RAP2.4 (related to AP2 4); DNA binding / transcription factor
MZ00027914	23			pco121063 (LOC100192650)	BZIP9 (BASIC LEUCINE ZIPPER 9); DNA binding / protein heterodimerization/ transcription factor	BZIP9 (BASIC LEUCINE ZIPPER 9); DNA binding / protein heterodimerization/ transcription factor
MZ00024491	23			POLGAMMA1	POLGAMMA1 (polymerase gamma 1); 3'-5' exonuclease/ DNA binding / DNA-directed DNA polymerase/ nucleic acid binding		mitochondrion
MZ00024040	23			PSAF (photosystem I reaction center subunit III)	PSAF (photosystem I subunit F)		plastid
MZ00035386	23			PSAK (photosystem I reaction center6)	PSAK (photosystem I subunit K)		plastid
MZ00016903	23			PTAC16 (hypothetical protein LOC100383193)	PTAC16 (PLASTID TRANSCRIPTIONALLY ACTIVE 16); binding / catalytic
MZ00028753	23			RSH2	RSH2 (RELA-SPOT HOMOLOG 2); GTP diphosphokinase
MZ00027804	23			SEC8 (LOC100279763)	SEC8 (SUBUNIT OF EXOCYST COMPLEX 8)
MZ00021124	23			SERAT3;1	ATSERAT3;1; acetyltransferase/ serine O-acetyltransferase
MZ00018107	23	x		si605092h09 (LOC100286147)	DNAJ heat shock N-terminal domain-containing protein
MZ00026371	23			SNRK2-9/SnRK2.9 (LOC100193827)	SNRK2.4 (SNF1-RELATED PROTEIN KINASE 2.4); kinase
MZ00013606	23			su1 (sugary1)	ISA1 (ISOAMYLASE 1); alpha-amylase/ isoamylase
MZ00030150	23			T10M13.2 (hypothetical protein LOC100279235)	protein kinase family protein
MZ00028730	23			T11J7.11	thioesterase family protein
MZ00032163	23			T13C7.14 (hypothetical protein LOC100382308)	DNAJ heat shock family protein
MZ00056843	23			T15N1.40 (hypothetical protein LOC100276060)
MZ00044044	23			T16L1.70 (carbonic anhydrase)	carbonic anhydrase family protein / carbonate dehydratase family protein		plastid
MZ00019229	23	x		T20F6.15 (hypothetical protein LOC100216966)	PLPB (PAS/LOV PROTEIN B); signal transducer/ two-component sensor
MZ00030922	23			T21P5.14 (LOC100281292)	armadillo/beta-catenin repeat family protein		plastid
MZ00042295	23	x		T27E11.120 (LOC100170242)	seven in absentia (SINA) family protein		mitochondrion
MZ00025122	23			T28I24.9 (LOC100284719)	serine/threonine/tyrosine kinase, putative
MZ00018746	23			T28K15.10 (disulfide oxidoreductase/ monooxygenase)	flavin-containing monooxygenase family protein / FMO family protein
MZ00017782	23			T29A15.90 (LOC100273451)	pfkB-type carbohydrate kinase family protein		plastid
MZ00025315	23			T29E15.22 (hypothetical protein LOC100273390)			plastid
MZ00003786	23	x		T29E15.4 (hypothetical protein LOC100274082)	HNH endonuclease domain-containing protein
MZ00043782	23			T2N18.18 (transcription factor subunit NF-YB2)	NF-YB8 (NUCLEAR FACTOR Y, SUBUNIT B8); transcription factor	T2N18.18 (transcription factor subunit NF-YB2)
MZ00028945	23			T3F17.25 (LOC100216931)			plastid
MZ00056305	23			T3H13.1 (ubiquitin-protein ligase)	F-box family protein (FBW2)
MZ00036623	23			T4M8.7 (myb-like DNA-binding domain, SHAQKYF class family protein)		T4M8.7 (myb-like DNA-binding domain, SHAQKYF class family protein)	nucleus
MZ00016201	23			T5A14.12	binding / protein binding		plastid
MZ00035810	23			T5E8.310 (40S ribosomal protein S15)	40S ribosomal protein S15 (RPS15D)
MZ00035385	23			T6A23.19 (nucleic acid binding protein)	KH domain-containing protein
MZ00029186	23			T6A23.6 (LOC100282116)	haloacid dehalogenase-like hydrolase family protein
MZ00027181	23			T6I14.50 (LOC100382637)	peptidase M1 family protein
MZ00025623	23			T7H20.280 (catalytic/ hydrolase)	haloacid dehalogenase-like hydrolase family protein
MZ00030767	23			T7N9.12 (hypothetical protein LOC100191830)	regulator of chromosome condensation (RCC1) family protein	regulator of chromosome condensation (RCC1) family protein
MZ00035103	23			T9N14.8 (LOC100284590)	PATL1 (PATELLIN 1); transporter
MZ00014746	23			TAT3 (LOC100274472)	aminotransferase class I and II family protein
MZ00033236	23			TIDP3588 (LOC100192823)	arginosuccinate synthase family
MZ00056113	23			TPS1 (trehalose-6-phosphate synthase)	ATTPS1 (TREHALOSE-6-PHOSPHATE SYNTHASE); alpha,alpha-trehalose-phosphate synthase (UDP-forming)/ transferase, transferring glycosyl groups
MZ00015476	23			TUB8 (beta tubulin4)	TUB8; structural constituent of cytoskeleton
MZ00041315	23			UBC30 (hypothetical protein LOC100192684)	UBC11 (UBIQUITIN-CONJUGATING ENZYME 11); ubiquitin-protein ligase
MZ00048661	23			UGT73C6 (cytokinin-O-glucosyltransferase 3)	DOGT1 (DON-GLUCOSYLTRANSFERASE 1); UDP-glycosyltransferase/ cis-zeatin O-beta-D-glucosyltransferase/ glucosyltransferase/ quercetin 4'-O-glucosyltransferase/ quercetin 7-O-glucosyltransferase/ trans-zeatin O-beta-D-glucosyltransferase/ transferase, t
MZ00024413	23	x		umc1588 (LOC100279803)	RAP2.12; DNA binding / transcription factor	RAP2.12; DNA binding / transcription factor
MZ00041203	23			umc1594 (LOC100274469)	LTP3 (LIPID TRANSFER PROTEIN 3); lipid binding
MZ00029092	23			UVR3 (hypothetical protein LOC100280217)	UVR3 (UV REPAIR DEFECTIVE 3); DNA (6-4) photolyase
MZ00028486	23			XF1 (hypothetical protein LOC100274333)	SQE3 (squalene epoxidase 3); squalene monooxygenase		plastid
MZ00026529	23			ZFN3 (LOC100191923)	ZFN1 (ZINC FINGER PROTEIN 1); DNA binding / nuclease/ nucleic acid binding	ZFN1 (ZINC FINGER PROTEIN 1); DNA binding / nuclease/ nucleic acid binding
dusk
Maizearray ID				gene annotation (Zea mays)	gene annotation (Arabidopsis thaliana)	transcription factor	cell component
MZ00030647	24		x	AT3G20810 (hypothetical protein LOC100272621)	transcription factor jumonji (jmjC) domain-containing protein	transcription factor jumonji (jmjC) domain-containing protein
MZ00013733	24			LOC100277749 (hypothetical protein LOC100277749)
MZ00029494	24		x	Os03g0280400 (LOC100284567
MZ00047716	24			Os10g0521100 (actin-depolymerizing factor)	ADF6 (ACTIN DEPOLYMERIZING FACTOR 6); actin binding
MZ00036541	25			AlaAT1 (alanine aminotransferase 1)	ALAAT2 (ALANINE AMINOTRANSFERASE 2); ATP binding / L-alanine:2-oxoglutarate aminotransferase
MZ00033327	25			ane3 (androgenic embryo3)
MZ00015851	25			AT3G13672 (hypothetical protein LOC100217140)	seven in absentia (SINA) family protein		nucleus
MZ00032506	25			AT3G18200 (nodulin-like protein)	nodulin MtN21 family protein		membrane
MZ00047139	25			AT3G56650 (hypothetical protein LOC100278794)	thylakoid lumenal 20 kDa protein		plastid
MZ0005304	25			BZIP60 (LOC100280864)	DNA binding / transcription factor; BZIP60	DNA binding / transcription factor; BZIP60	nucleus
MZ0005217	25			CDKD1;3 (LOC100272776)	CDCKD;3/CAK2AT/CDKD1;3 (CYCLIN-DEPENDENT KINASE D1;3);
MZ00022804	25			cl61420_1 (LOC100192099)	APUM8 (Arabidopsis Pumilio 8); RNA binding / binding
MZ00026662	25			CRK (LOC100280531)	calcium ion binding / calcium-dependent protein serine/threonine phosphatase/ kinase
MZ00020450	25			CS26	OASA1 (O-ACETYLSERINE (THIOL) LYASE (OAS-TL) ISOFORM A1); cysteine synthase
MZ00020140	25			EDA7 (nucleolar protein 10)	EDA7 (embryo sac development arrest 7)		plastid
MZ00032421	25	x		F11C18.13 (hypothetical protein LOC100191813)
MZ00019552	25			F17I5.110 (hypothetical protein LOC100382074)	protein phosphatase 2C family protein / PP2C family protein
MZ00030417	25			F1M20.26	pentatricopeptide (PPR) repeat-containing protein
MZ00021992	25			F20N2.6 (hypothetical protein LOC10027373)	pentatricopeptide (PPR) repeat-containing protein
MZ00023326	25	x	x	F2O15.24 (ARR1 protein-like)	myb family transcription factor	myb family transcription factor	nucleus
MZ00025489	25	x	x	F3H9.20 (hypothetical protein LOC100191639)
MZ00014657	25	x		F6F22.30 (LOC100283)	protein arginine N-methyltransferase, putative
MZ00013979, MZ00026616	25	x	x	gigz1b (gigantea like1B)	GI (GIGANTEA	GI (GIGANTEA
MZ00023996	25	x		IDP2462 (LOC100284344)	ATPLT5 (POLYOL TRANSPORTER 5); D-ribose transmembrane transporter/ D-xylose transmembrane transporter/ carbohydrate transmembrane transporter/ galactose transmembrane transporter/ glucose transmembrane transporter/ glycerol transmembrane transporter
MZ00025494	25	x		IDP310 (LOC100193777)	adenylosuccinate lyase, putative / adenylosuccinase, putative
MZ00057436	25			LKP2	LKP2 (LOV KELCH PROTEIN 2); protein binding / ubiquitin-protein ligase
MZ0004580	25			LOC100191353 (hypothetical protein LOC100191353)
MZ00013739	25			LOC100191775 (hypothetical protein LOC100191775)
MZ00022096, MZ00038662	25			LOC100192612 (hypothetical protein LOC100192612)
MZ00044700	25		x	LOC100192612 (hypothetical protein LOC100192612)
MZ00030016	25			LOC100193136 (hypothetical protein LOC100193136)
MZ00035695	25	x		LOC100193921 (hypothetical protein LOC100193921)
MZ00052495	25			LOC100272680 (hypothetical protein LOC100272680)
MZ00031976	25			LOC100273281 (hypothetical protein LOC100273281)
MZ00036166	25			LOC100275312 (hypothetical protein LOC100275312)
MZ00043226	25			LOC100275340 (hypothetical protein LOC100275340)
MZ00034977	25			LOC100276770 (hypothetical protein LOC100276770)
MZ00026064	25	x		LOC100276952 (hypothetical protein LOC100276952)
MZ00013233	25			LOC100277224 (hypothetical protein LOC100277224)
MZ00000520	25			LOC100277587 (hypothetical protein LOC100277587)
MZ00019882	25			LOC100277793 (hypothetical protein LOC100277793
MZ00028670	25			LOC100278080 (hypothetical protein LOC100278080)
MZ00016846	25			LOC100279149 (hypothetical protein LOC100279149)
MZ00004190, MZ00029660	25			LOC100279648 (hypothetical protein LOC100279648)
MZ00042894	25	x		LOC100280901 (metallothionein-like protein type 2)
MZ00017188	25	x		LOC100283076 (EREBP-4 like protein)		LOC100283076 (EREBP-4 like protein)
MZ00024075	25			LOC100284317 (glucose-6-phosphate 1-dehydrogenase, cytoplasmic isoform)	G6PD6 (GLUCOSE-6-PHOSPHATE DEHYDROGENASE 6); glucose-6-phosphate dehydrogenase
MZ00048047	25			LOC100304009 (hypothetical protein LOC100304009
MZ00014414, MZ00017877	25			LOC100304310 (hypothetical protein LOC100304310	minichromosome maintenance family protein / MCM family protein	minichromosome maintenance family protein / MCM family protein
MZ00051344	25			LOC100381282 (hypothetical protein LOC100381282)	scpl40 (serine carboxypeptidase-like 40); serine-type carboxypeptidase
MZ00029026	25		x	LOC100383277 (hypothetical protein LOC100383277)	FKF1 (FLAVIN-BINDING, KELCH REPEAT, F BOX 1); signal transducer/ two-component sensor/ ubiquitin-protein ligase
MZ00032138	25			LOC100384554 (hypothetical protein LOC100384554)
MZ00016962	25			MIO24.12 (LOC100286067)	subtilase family protein
MZ00025688	25	x		MTI20.21 (LOC100272678)	26S proteasome regulatory subunit, putative
MZ00019890	25			MWD9.13 (hypothetical protein LOC100278566)			plastid
MZ00032154	25			MXC9.6 (hypothetical protein LOC100280009)	pentatricopeptide (PPR) repeat-containing protein
MZ00023428	25			MXC9.7	elongation factor 1B alpha-subunit 1 (eEF1Balpha1)
MZ00027489	25			NAP57 (hypothetical protein LOC100382692)	NAP57 (Arabidopsis thaliana homologue of NAP57); pseudouridine synthase
MZ00030520	25		x	Os01g0202500 (hypothetical protein LOC100274169	LZF1 (LIGHT-REGULATED ZINC FINGER PROTEIN 1); transcription factor/ zinc ion binding	LZF1 (LIGHT-REGULATED ZINC FINGER PROTEIN 1); transcription factor/ zinc ion binding
MZ00040444	25			Os01g0227400 (hypothetical protein LOC100192876)	CYP71A21; electron carrier/ heme binding / iron ion binding / monooxygenase/ oxygen binding
MZ00012817	25			Os01g0974400 (ring zinc finger protein)	ankyrin repeat family protein
MZ00015473	25	x		Os02g0230000
MZ0003769, MZ00031741, MZ00056701	25		x	Os03g0184100 (hypothetical protein LOC100274071)
MZ00014996	25	x	x	Os04g0671200 (LOC100191603)	ATPAO2 (Polyamine oxidase 2); amine oxidase/ electron carrier/ oxidoreductase
MZ00019124	25	x		Os05g0231700 (tonoplast intrinsic protein4	TIP4;1 (tonoplast intrinsic protein 4;1); water channel
MZ00022501	25			Os05g0430200 (ATP binding protein)	deoxynucleoside kinase family
MZ0007570, MZ00021611	25			Os06g0660600 (hypothetical protein LOC100381957)
MZ00036278	25	x		Os07g0230500 (hypothetical protein LOC100193415)	endo/excinuclease amino terminal domain-containing protein
MZ00048905	25			Os09g0412700 (hypothetical protein LOC100278276
MZ00019763, MZ00021845	25	x	x	Os11g0157600 (LOC100272683)	pseudo-response regulator, putative / timing of CAB expression 1-like protein, putative	pseudo-response regulator, putative / timing of CAB expression 1-like protein, putative
MZ00039932	25			OSB1 (single-strand binding protein)	single-stranded DNA binding		mitochondrion
MZ00013292	25			pco104090b (LOC100273450)	RNA-binding protein 45 (RBP45), putative
MZ00016217	25	x		pco121378 (LOC100285610)	DNAJ heat shock N-terminal domain-containing protein
MZ00020956	25	x		PDE319 (RNA polymerase2)	DNA binding / DNA-directed RNA polymerase
MZ00000482	25			T12M4.2 (LOC100282153)	IMPA-2 (IMPORTIN ALPHA ISOFORM 2); binding / protein transporter
MZ00044608	25			T1E22.170 (hypothetical protein LOC100384825)	DIE2/ALG10 family		membrane
MZ00026730	25			T1P17.20 (LOC100216724)	trehalose-6-phosphate phosphatase, putative
MZ00028627	25			T23A1.11 (LOC100281607)			mitochondrion
MZ00015045	25	x		T27E11.130 (hypothetical protein LOC100273219)	nuclear movement family protein
MZ00039118	25			T29M8.10 (respiratory burst oxidase-like protein C)	respiratory burst oxidase protein E (RbohE) / NADPH oxidase		membrane
MZ00025840	25			T7D17.9 (LOC100279852)	HEAT repeat-containing protein
MZ00037128, MZ00043338	25			THI1 (thiamine biosynthesis2)	THI1 (THIAZOLE REQUIRING)		plastid
MZ00032446	25		x	TOC1 (LOC100281433)	TOC1 (TIMING OF CAB1 1); transcription regulator	TOC1 (TIMING OF CAB1 1); transcription regulator
MZ00028137	25			TOZ (hypothetical protein LOC100193557)	TOZ (TORMOZEMBRYO DEFECTIVE); nucleotide binding		nucleus
MZ00028102	25			umc1472 (LOC100384739	SAR DNA-binding protein, putative
MZ00004439	25			VAR3 (hypothetical protein LOC100273872)	VAR3 (VARIEGATED 3); binding / zinc ion binding		plastid
MZ00020231	25			XERICO (RING-H2 finger protein)	protein binding / zinc ion binding
MZ0004559	26			5PT2 (inositol-1,4,5-triphosphate-5-phosphatase)	inositol polyphosphate 5-phosphatase, putative
MZ00029269	26			LOC100216787 (hypothetical protein LOC100216787)
MZ00028692	26			LOC100216923 (hypothetical protein LOC100216923)
MZ00046495	26			LOC100273482 (hypothetical protein LOC100273482)
MZ00013730	26			LOC100275312 (hypothetical protein LOC100275312)
MZ00013731	26			LOC100275664 (hypothetical protein LOC100275664)
MZ0004675	26			LOC100278373 (hypothetical protein LOC100278373)	NPY2 (NAKED PINS IN YUC MUTANTS 2); protein binding / signal transducer
MZ00051020	26		x	LOC100285484 (dnaJ-like protein)	heat shock protein binding
MZ00012650	26			Os03g0421000
MZ00043740	26			Os07g0691300 (LOC100191899)
MZ00000661	26			Os10g0195600 (transferase family protein)			mitochondrion
MZ00042055	27			4CL1 (hypothetical protein LOC100382272)	4CL2 (4-COUMARATE:COA LIGASE 2); 4-coumarate-CoA ligase
MZ00049524	27			AT1G11915 (hypothetical protein LOC10027767
MZ00029870	27			AT2G43110 (hypothetical protein LOC100279147)
MZ00014625	27			AT3G07700 (LOC100272650)	ABC1 family protein
MZ00013858	27			AT3G12860 (LOC100283975	NOP56 (Arabidopsis homolog of nucleolar protein Nop56)
MZ00020796	27			AT3G13860 (hypothetical protein LOC100272259)	HSP60-3A (HEAT SHOCK PROTEIN 60-3A); ATP binding / protein binding
MZ00047874	27			AT3G48820 (sialyltransferase like protein)	glycosyl transferase family 29 protein / sialyltransferase family protein		golgi
MZ00030507	27			BIO1 (LOC100382888)	BIO1 (biotin auxotroph 1); adenosylmethionine-8-amino-7-oxononanoate transaminase
MZ00004554	27			CAT5 (LOC100194142	AAT1 (AMINO ACID TRANSPORTER 1); L-glutamate transmembrane transporter/ L-lysine transmembrane transporter/ arginine transmembrane transporter/ cationic amino acid transmembrane transporter		membrane
MZ00013713	27			cl3071_3 (LOC100382609)	VIP4 (VERNALIZATION INDEPENDENCE 4); protein binding
MZ00044791	27			F13M7.14 (LOC100384449)	PRMT10; [myelin basic protein]-arginine N-methyltransferase/ histone-arginine N-methyltransferase/ methyltransferase/ protein-arginine omega-N asymmetric methyltransferase/ protein-arginine omega-N monomethyltransferase
MZ00042422	27			F14M4.28 (hypothetical protein LOC100273145	oxidoreductase, acting on the CH-CH group of donors		plastid
MZ00018883	27			F17F8.15 (hypothetical protein LOC100381675	GTP-binding protein (ERG
MZ00021595	27			F18E5.150 (hypothetical protein LOC100304372)	nucleotide binding
MZ00034206	27			F1N18.8 (hypothetical protein LOC100383520)	glycyl-tRNA synthetase / glycine--tRNA ligase		mitochondrion
MZ0006909	27			F22C12.22 (hypothetical protein LOC100193387)
MZ00057313	27			F22G10.4 (DNA-directed RNA polymerases I, II, and III 7.3 kDa polypeptid			nucleus
MZ00016019	27			F24B9.7 (39S ribosomal protein L47)	ribosomal protein L29 family protein
MZ00030761	27			F27D4.8 (hypothetical protein LOC100279547)	endomembrane protein 70, putative		membrane
MZ00016875	27			F3I6.25 (hypothetical protein LOC100276495			plastid
MZ00029450	27			F3L17.90	SDA1 family protein
MZ00020461	27			LOC100037827 (chloroplast post-illumination chlorophyll fluorescence increase protein)	PIFI (post-illumination chlorophyll fluorescence increase)
MZ00023254	27			LOC100193251 (hypothetical protein LOC100193251)
MZ00000569	27			LOC100216742 (hypothetical protein LOC100216742)
MZ00020202	27			LOC100216863 (hypothetical protein LOC100216863)	caffeoyl-CoA 3-O-methyltransferase, putative
MZ00019758	27			LOC100272458 (hypothetical protein LOC100272458)
MZ00041200	27			LOC100275664 (hypothetical protein LOC100275664)
MZ00022766	27			LOC100276762 (hypothetical protein LOC100276762)
MZ00033512	27			LOC100279418 (hypothetical protein LOC100279418)
MZ00048415	27			LOC100279451 (hypothetical protein LOC100279451
MZ00017356	27	x		LOC100280101 (hypothetical protein LOC100280101)	wound-responsive family protein
MZ00004348	27			LOC100281909 (cortical cell-delineating p	ELP (EXTENSIN-LIKE PROTEIN); lipid binding
MZ00020092	27			LOC100304240 (hypothetical protein LOC100304240)	LUG (LEUNIG); protein binding / protein heterodimerization/ transcription repressor
MZ00005240	27			LOC100383407 (hypothetical protein LOC100383407)	TET2 (TETRASPANIN2)		membrane
MZ00057181	27			LOC100383743 (hypothetical protein LOC100383743
MZ00021877	27			LOC542135 (hypothetical LOC542135)
MZ00034213	27			LOC778431 (LOC778431	P5CS1 (DELTA1-PYRROLINE-5-CARBOXYLATE SYNTHASE 1); delta1-pyrroline-5-carboxylate synthetase
MZ00030344	27			MAH20.17	DEAD box RNA helicase, putative
MZ00016777	27			MQL5.22 (hypothetical protein LOC100217071)
MZ0001450	27			MUL8.30 (LOC100274076)			mitochondrion
MZ0003576	27			MZA15.9 (hypothetical protein LOC100384682	pentatricopeptide (PPR) repeat-containing protein
MZ0004368, MZ00052502	27			Os01g0546400 (hypothetical protein LOC100278497)
MZ00031602	27			Os01g0762600 (hypothetical protein LOC100192475	TIM50
MZ00031358	27			Os01g0771400 (hypothetical protein LOC100383827)	UBP13 (UBIQUITIN-SPECIFIC PROTEASE 13); ubiquitin thiolesterase/ ubiquitin-specific protease
MZ00027418	27			Os02g0532900 (glucan endo-1,3-beta-glucosidase 7)	ATBG_PAP; glucan endo-1,3-beta-D-glucosidase/ hydrolase, hydrolyzing O-glycosyl compounds
MZ00013104	27			Os02g0589000 (hypothetical protein LOC100280003)
MZ00013702	27			Os02g0613200 (regulatory subunit)	leucine-rich repeat family protein
MZ00001781	27			Os02g0699000 (hypothetical protein LOC100383742)	PTR2 (PEPTIDE TRANSPORTER 2); dipeptide transporter/ high affinity oligopeptide transporter/ nitrate transmembrane transporter/ peptide transporter/ transporter/ tripeptide transporter
MZ00015046	27			Os02g0743800 (LOC100282404)	nuclear movement family protein
MZ00018018	27			Os04g0510500 (LOC100272873)
MZ00029407	27			Os05g0165500 (hypothetical protein LOC100280099)
MZ00014084	27			Os05g0506900 (LOC100282857)	brix domain-containing protein
MZ00055377	27			Os06g0725100 (hypothetical protein LOC100274121)
MZ00044064	27			Os07g0456900
MZ00035000	27			Os12g0161700 (LOC100276865)
MZ00014572	27			pco060604 (LOC541933)	NRP2 (NAP1-RELATED PROTEIN 2); DNA binding / chromatin binding / histone binding
MZ00017861	27			pco073700 (LOC100283824)
MZ00027634	27			pco073825 (LOC100274237)	MTSSB (mitochondrionondrially targeted single-stranded DNA binding protein); single-stranded DNA binding
MZ00041373	27			pco099353 (LOC100273666)	HTA2 (histone H2A); DNA binding	HTA2 (histone H2A); DNA binding
MZ00025180	27			pco151044 (LOC100273433)	phosphate translocator-related
MZ00022441	27	x		si618037g07 (LOC100285792)
MZ00017688	27			SWA1 (small nucleolar ribonucleoprotein complex subunit)	SWA1 (SLOW WALKER1); nucleotide binding		nucleus
MZ00030158	27			T1J8.20 (hypothetical protein LOC100272490)	DNA binding / sequence-specific DNA binding
MZ00021215	27			T1N15.19 (hypothetical protein LOC100276543)			plastid
MZ00023017	27			T1P2.4	intron maturase, type II family protein		plastid
MZ00035467	27			T22A6.220 (hypothetical protein LOC100383174)	AFB5 (Auxin F-Box protein 5); ubiquitin-protein ligase
MZ00027540	27			T22H22.21 (LOC100273161)	protein kinase family protein
MZ00017726	27			T29J13.250 (hypothetical protein LOC100217227	aminoacyl-tRNA hydrolase		mitochondrion
MZ00048232	27			T30B22.15	pectinesterase family protein
MZ00020949	27			T5F17.40 (LOC100282874)			plastid
MZ0001337	27			T5J8.14 (tetratricopeptide-like helical)	pentatricopeptide (PPR) repeat-containing protein		plastid
MZ00017433	27			T5M16.14 (tubulin--tyrosine ligase-like protein 12)	protein binding / tubulin-tyrosine ligase		membrane
MZ00017304	27			T6D22.6 (LOC100279033)			plastid
MZ00026734	27			T9J14.23 (hypothetical protein LOC100280058)	pseudouridine synthase		mitochondrion
MZ00017195	27			TOM40 (mitochondrionondrial import receptor subunit TOM40)	TOM40; P-P-bond-hydrolysis-driven protein transmembrane transporter/ voltage-gated anion channel		mitochondrion
MZ00020272	27			TOZ (hypothetical protein LOC100193557)	TOZ (TORMOZEMBRYO DEFECTIVE); nucleotide binding		nucleus
MZ00013823	28	x		AALP (cysteine protease2)	AALP (Arabidopsis aleurain-like protease); cysteine-type peptidase		membrane
MZ00004327	28			AI676903 (LOC100279569)
MZ00037003	28			AlaAT1 (alanine aminotransferase 1)	ALAAT2 (ALANINE AMINOTRANSFERASE 2); ATP binding / L-alanine:2-oxoglutarate aminotransferase
MZ00051216	28			APG6 (LOC100193235)	CLPB3 (CASEIN LYTIC PROTEINASE B3); ATP binding / ATPase/ nucleoside-triphosphatase/ nucleotide binding / protein binding
MZ00018376	28			AT3G07440 (hypothetical protein LOC100276742
MZ00042289	28			AT3G12860 (LOC100283975	NOP56 (Arabidopsis homolog of nucleolar protein Nop56)
MZ00049815	28			AT3G18370 (LOC100192718)	ATSYTF
MZ00030582	28			AT3G26990 (LOC100278822			plastid
MZ00028266	28	x		AT3G53630 (hypothetical protein LOC100278585)
MZ00022612	28			AT3G55160			mitochondrion
MZ00020638	28			AT4G03115 (hypothetical protein LOC100193603)	binding		mitochondrion
MZ00033113	28			BIO1 (LOC100382888)	BIO1 (biotin auxotroph 1); adenosylmethionine-8-amino-7-oxononanoate transaminase
MZ00001382	28			DNMT2 (DNA methyl transferase4)	DNMT2 (DNA METHYLTRANSFERASE-2); DNA binding
MZ00056085	28			F13A10.11 (hypothetical protein LOC100277985)	pyridoxine 5'-phosphate oxidase-related
MZ00021674	28			F16N3.4 (hypothetical protein LOC100381796	amino acid transporter family protein		membrane
MZ00016532	28			F17A13.10 (LOC100277562)	zinc finger (CCCH-type) family protein
MZ00029799	28			F17A14.9	PCS1 (PROMOTION OF CELL SURVIVAL 1); aspartic-type endopeptidase/ peptidase
MZ00024615	28	x		F17N18.140 (LOC10028111	short-chain dehydrogenase/reductase (SDR) family protein
MZ00021207	28			F19K19.17	HAC12 (histone acetyltransferase of the CBP family 12); H3/H4 histone acetyltransferase/ histone acetyltransferase/ transcription cofactor	HAC12 (histone acetyltransferase of the CBP family 12); H3/H4 histone acetyltransferase/ histone acetyltransferase/ transcription cofactor
MZ00034279	28			F1N18.26 (hypothetical protein LOC100194402)
MZ00014733	28			F1N18.9	tRNA synthetase class II (G, H, P and S) family protein
MZ00043404	28			F25I18.5 (mitochondrionondrial chaperonin 60	HSP60 (HEAT SHOCK PROTEIN 60); ATP binding		mitochondrion
MZ00042152	28			F26H11.30 (LOC100276799)
MZ00032226	28			F28B23.15 (hypothetical protein LOC100384150	binding / protein transporter		nucleus
MZ00016450	28	x		F28J12.20 (hydroxyacid oxidase 1)	(S)-2-hydroxy-acid oxidase, peroxisomal, putative / glycolate oxidase, putative / short chain alpha-hydroxy acid oxidase, putative
MZ00019623	28			F3G5.2 (hypothetical protein LOC100192035)	pentatricopeptide (PPR) repeat-containing protein		plastid
MZ00016904	28			F4I18.29	eukaryotic initiation factor 3 gamma subunit family protein
MZ00013138	28			F7H19.1			plastid
MZ00026922	28			GFA2 (LOC100282679)	GFA2 (GAMETOPHYTIC FACTOR 2); heat shock protein binding / unfolded protein binding		mitochondrion
MZ00017821, MZ00036517	28		x	gigz1b (gigantea like1B)	GI (GIGANTEA)	GI (GIGANTEA)
MZ00025483	28	x		GRF10 (14-3-3-like protein)	GRF11 (GENERAL REGULATORY FACTOR 11); ATPase binding / amino acid binding / protein binding / protein phosphorylated amino acid binding		membrane
MZ00042760	28	x		IDP310 (LOC100193777)	adenylosuccinate lyase, putative / adenylosuccinase, putative
MZ00014220	28			IDP703 (LOC100384046)
MZ00004900	28			LCBK1 (LOC100192564)	ATLCBK1 (A. THALIANA LONG-CHAIN BASE (LCB) KINASE 1); D-erythro-sphingosine kinase/ diacylglycerol kinase
MZ00055866	28			LOC100191790 (hypothetical protein LOC100191790
MZ00041197	28			LOC100192063 (hypothetical protein LOC100192063)
MZ00004607	28			LOC100192077 (hypothetical protein LOC100192077)	ATL8; protein binding / zinc ion binding
MZ00031973	28		x	LOC100192612 (hypothetical protein LOC100192612
MZ00000453	28			LOC100272261 (hypothetical protein LOC100272261)
MZ00031692	28			LOC100272294 (hypothetical protein LOC100272294)	exonuclease family protein
MZ00027017	28			LOC100272779 (hypothetical protein LOC100272779)	NFD1 (NUCLEAR FUSION DEFECTIVE 1); RNA binding / structural constituent of ribosome
MZ00013492	28			LOC100273206 (hypothetical protein LOC100273206)	plastocyanin-like domain-containing protein
MZ00022092	28			LOC100273469 (hypothetical protein LOC100273469	GPDHC1; NAD or NADH binding / glycerol-3-phosphate dehydrogenase (NAD+)
MZ00022869	28			LOC100273688 (hypothetical protein LOC100273688)
MZ00044052	28			LOC100273853 (hypothetical protein LOC100273853)	Gar1 RNA-binding region family protein
MZ00028232	28			LOC100274599 (hypothetical protein LOC100274599)
MZ00041198	28			LOC100274726 (hypothetical protein LOC100274726)
MZ00043223	28			LOC100275278 (hypothetical protein LOC100275278)
MZ00041196	28			LOC100275312 (hypothetical protein LOC100275312)
MZ00055772	28			LOC100275340 (hypothetical protein LOC100275340
MZ00001294	28			LOC100276770 (hypothetical protein LOC100276770)
MZ00004318	28			LOC100277922 (hypothetical protein LOC100277922)
MZ00003580	28			LOC100278312 (hypothetical protein LOC100278312)
MZ00022256	28			LOC100278980 (hypothetical protein LOC100278980)
MZ00018789	28			LOC100279693 (hypothetical protein LOC100279693)
MZ00012553	28			LOC100284176 (GDU1)
MZ00025229	28			LOC100284566 (heterogeneous nuclear ribonucleoprotein A3-like protein 2)	RNA recognition motif (RRM)-containing protein
MZ00030164	28		x	LOC100284763 (4Fe-4S ferredoxin, iron-sulfur binding protein)
MZ00013769	28			LOC100284808 (40S ribosomal protein S26)	40S ribosomal protein S26 (RPS26A)
MZ00047133	28			LOC100285017 (ramosa 2)
MZ00013313	28			LOC100382235 (hypothetical protein LOC100382235)	thaumatin, putative
MZ00038495	28			LOC100382789 (hypothetical protein LOC100382789)
MZ00022020	28			LOC100383504 (hypothetical protein LOC100383504)	TET6 (TETRASPANIN6)
MZ00042698	28			LOC100383650 (hypothetical protein LOC100383650)
MZ00015561	28			LOC100384089 (hypothetical protein LOC100384089)
MZ00022881	28			LOC100384681 (hypothetical protein LOC100384681)
MZ00042681	28			LOC100384792 (hypothetical protein LOC100384792)	SCPL34; serine-type carboxypeptidase
MZ00028674	28			NAP57 (hypothetical protein LOC100382692)	NAP57 (Arabidopsis thaliana homologue of NAP57); pseudouridine synthase
MZ00037835	28			NPL41 (hypothetical protein LOC100194136)	NPL4 family protein
MZ00050584	28			OGG1 (hypothetical protein LOC100273912)	OGG1 (8-OXOGUANINE-DNA GLYCOSYLASE 1); oxidized purine base lesion DNA N-glycosylase
MZ00027573	28			OLEO4 (oleosin 18 kDa)	OLEO2 (OLEOSIN 2)		membrane
MZ00056129	28			Os03g0113900 (hypothetical protein LOC100275875)
MZ00024350	28			Os04g0463500 (anthranilate synthase component II)	anthranilate synthase beta subunit, putative
MZ00043824	28			Os04g0599800 (cell division cycle protein 20)	CDC20.1; signal transducer
MZ00015765	28	x		Os07g0112800 (hypothetical protein LOC100192991)	ELF5A-1 (EUKARYOTIC ELONGATION FACTOR 5A-1); translation initiation factor
MZ00001331	28			Os07g0178600 (LOC100280318)	AT-HSFA6B; DNA binding / transcription factor	AT-HSFA6B; DNA binding / transcription factor
MZ00031954	28			Os07g0408500 (rac GTPase activating protein)	rac GTPase activating protein, putative
MZ00005421	28			Os07g0419300 (thaumatin-like protein 1a)
MZ00047688	28			Os07g0644600 (cytochrome P450 CYP727A4)
MZ00015673	28			Os08g0408500 (LOC542569)
MZ00043050	28			Os08g0431200 (hypothetical protein LOC100384238)	formin homology 2 domain-containing protein / FH2 domain-containing protein
MZ00026461	28			Os11g0551900 (LOC100125640)	AtGRF2 (GROWTHREGULATING FACTOR 2); transcription activator	AtGRF2 (GROWTHREGULATING FACTOR 2); transcription activator
MZ00050510	28			Os11g0582500 (hypothetical protein LOC100276889			membrane
MZ00025587	28	x		PAO3 (LOC100384522)	ATPAO4 (ARABIDOPSIS THALIANA POLYAMINE OXIDASE 4); amine oxidase/ polyamine oxidase
MZ00003682, MZ00032942	28			PAP13 (hypothetical protein LOC100384711)	PAP15 (PURPLE ACID PHOSPHATASE 15); acid phosphatase/ protein serine/threonine phosphatase
MZ00030249	28			pco086600 (LOC100192979)	NHL repeat-containing protein
MZ00026024	28			pco111195 (LOC100276287)
MZ00016397	28			pco146254a (LOC100284070)	brix domain-containing protein
MZ00028030	28			QS			plastid
MZ00057125	28			RABG3b (hypothetical protein LOC100272622)	ATRAB7B (ARABIDOPSIS RAB GTPASE HOMOLOG G3F); GTP binding
MZ00026235	28			RCA (RUBISCO activase1) ribulose bisphosphate carboxylase/oxygenase activase, chloroplastic precursor	RCA (RUBISCO ACTIVASE); ADP binding / ATP binding / enzyme regulator/ ribulose-1,5-bisphosphate carboxylase/oxygenase activator		plastid
MZ00020524	28			RGP1 (LOC100282614)	RGP3 (REVERSIBLY GLYCOSYLATED POLYPEPTIDE 3); transferase, transferring hexosyl groups
MZ00013371	28			RPL5A (60S ribosomal protein L5-1)	ATL5 (A. THALIANA RIBOSOMAL PROTEIN L5); 5S rRNA binding / structural constituent of ribosome		mitochondrion
MZ00024798	28			si496006g11 (LOC100283705)	SOS3 (SALT OVERLY SENSITIVE 3); calcium ion binding / calcium-dependent protein serine/threonine phosphatase
MZ00014722	28			STT3B (hypothetical protein LOC100192699)	STT3B (staurosporin and temperature sensitive 3-like b); oligosaccharyl transferase
MZ00017059	28			T15N1.70 (LOC100279772)	polyribonucleotide nucleotidyltransferase, putative
MZ00003455, MZ00031201	28			T17C22.4 (hypothetical protein LOC100279796)
MZ00048439	28			T1N15.19 (hypothetical protein LOC100276543)			plastid
MZ00049562	28			T1O3.5 (hypothetical protein LOC100274137)	3-oxoacyl-(acyl-carrier-protein) synthase II, putative
MZ00001333	28			T20K18.90 (A/G-specific adenine DNA glycosylase)	adenine-DNA glycosylase-related / MYH-related		mitochondrion
MZ00024612	28			T24G5.40 (stem-specific protein TSJT1)	AILP1
MZ00028489	28			T3F17.14 (hypothetical protein LOC100279397	delta-8 sphingolipid desaturase, putative		membrane
MZ00031023	28			T3K9.25 (hypothetical protein LOC100217276)			plastid
MZ00006843	28			T7H20.230 (hypothetical protein LOC100383728)	amino acid transporter family protein		membrane
MZ00025042	28			UCC1 (blue copper protein)
MZ00042456	29			ARL1 (LOC100382440)	ARL1 (ARG1-LIKE 1); heat shock protein binding / unfolded protein binding
MZ00050534	29			AT3G14810	MSL5 (MECHANOSENSITIVE CHANNEL OF SMALL CONDUCTANCE-LIKE 5)		membrane
MZ00032115	29			AT3G21540	transducin family protein / WD-40 repeat family protein		mitochondrion
MZ00001489	29			AT3G23470	cyclopropane-fatty-acyl-phospholipid synthase		membrane
MZ00038773	29			AT3G55750 (60S ribosomal protein L33-B)	60S ribosomal protein L35a (RPL35aC)
MZ00032519	29			AT3G62280 (alpha-L-fucosidase 2)	GDSL-motif lipase/hydrolase family protein		membrane
MZ00027718	29			ATFX/GER1 (GDP-L-fucose synthase	GER2; binding / catalytic/ coenzyme binding
MZ00023395	29	x		ATHSP17.4 (hypothetical protein LOC100191552)	HSP18.2 (heat shock protein 18.2)
MZ00054976	29			BGAL3 (LOC100382452)	BGAL3 (beta-galactosidase 3); beta-galactosidase/ catalytic/ cation binding / sugar binding		membrane
MZ00043460	29			cl12292_1a (LOC100279326)
MZ00041792	29			F10A12.27 (vacuolar sorting protein 4b)	SKD1 (SUPPRESSOR OF K+ TRANSPORT GROWTH DEFECT1); ATP binding / nucleoside-triphosphatase/ nucleotide binding
MZ00018301	29			F14J22.10 (hypothetical protein LOC100381485)	NQR; binding / catalytic/ oxidoreductase/ zinc ion binding		mitochondrion
MZ00047620	29			F17H15.17 (hypothetical protein LOC100279395)
MZ00043834	29	x		GIF2 (GRF-interacting factor 2-like) putative GRF-interacting factor 2	SSXT protein-related / transcription co-activator-related	SSXT protein-related / transcription co-activator-related
MZ00040869	29			H4C14 (histone H4)	HIS4; DNA binding	HIS4; DNA binding
MZ00028629	29			KIN13 (kinesin-related protein13)
MZ00045584	29			LOC100274047 (hypothetical protein LOC100274047)
MZ00019775	29			LOC100274063 (hypothetical protein LOC100274063	CAAX amino terminal protease family protein
MZ00019879	29			LOC100276118 (hypothetical protein LOC100276118)
MZ00018703	29	x		LOC100279586 (hypothetical protein LOC100279586)
MZ00022781	29			LOC100279771 (hypothetical protein LOC100279771)
MZ00029345	29			LOC100283251 (seed specific protein Bn15D17A)	LBD41 (LOB DOMAIN-CONTAINING PROTEIN 41)
MZ00037492	29	x		LOC100284335 (co-chaperone protein SBA1)	glycine-rich protein
MZ00057284	29			LOC100284490 (protein binding protein)
MZ00016973	29			LOC100381374 (rac-like GTP-binding protein 4)	ROP10 (RHO-RELATED PROTEIN FROM PLANTS 10); GTP binding / GTPase
MZ00024008	29			LOC100382302 (hypothetical protein LOC100382302)
MZ00056027	29			MAE1.1 (hypothetical protein LOC100191504)	2-phosphoglycerate kinase-related
MZ00044624	29			MCA23.7 (hypothetical protein LOC100274135)	D6PKL2 (D6 PROTEIN KINASE LIKE 2); kinase		nucleus
MZ00038806	29			NTRB (LOC100381735)	C2 domain-containing protein
MZ00028312	29			Os01g0762600 (hypothetical protein LOC100192475)	TIM50		mitochondrion
MZ00057044	29			Os03g0659800 (LOC100277799)			plastid
MZ00022044	29			Os04g0107700 (hypothetical protein LOC100382061)	cysteine proteinase, putative
MZ00003783	29			Os04g0502900 (calcium binding atopy-related autoantigen 1)	calcium-binding EF hand family protein		mitochondrion
MZ00036342	29			Os08g0510500 (hypothetical protein LOC100274024
MZ00024820	29			pco098884 (LOC100284436)
MZ00031936	29			T1G16.1 (LOC100277723)	catalytic/ protein binding / serine-type endopeptidase/ serine-type peptidase
MZ00037637	29			T20G20.6 (hypothetical protein LOC100278728)			plastid
MZ00043783	29			T2N18.18 (transcription factor subunit NF-YB2)	NF-YB8 (NUCLEAR FACTOR Y, SUBUNIT B8); transcription factor	NF-YB8 (NUCLEAR FACTOR Y, SUBUNIT B8); transcription factor
MZ00007093	29			T4M8.29 (auxin-independent growth promoter)			mitochondrion
MZ00016349	29			T9J14.10 (hypothetical protein LOC100275732)
MZ00022867	29			TAG1 (hypothetical protein LOC100383910)	TAG1 (TRIACYLGLYCEROL BIOSYNTHESIS DEFECT 1); diacylglycerol O-acyltransferase		plastid
MZ00046626	29			TTN1 (hypothetical protein LOC100273796)	TTN1 (TITAN 1); tubulin binding
MZ00032235	29			TTN8 (hypothetical protein LOC100272324)	TTN8 (TITAN8); ATP binding / transporter
MZ00044613	30			A_TM018A10.14 (hypothetical protein LOC100191663)	RNA recognition motif (RRM)-containing protein
MZ00037681	30			ABO1 (LOC100193043)	ABO1 (ABA-OVERLY SENSITIVE 1); transcription elongation regulator	ABO1 (ABA-OVERLY SENSITIVE 1); transcription elongation regulator
MZ00046721	30			ACA4	ACA11 (autoinhibited Ca2+-ATPase 11); calcium-transporting ATPase/ calmodulin binding
MZ00027202	30			ACD11 (LOC100275982)	ACD11 (ACCELERATED CELL DEATH 11); sphingosine transmembrane transporter
MZ00031700	30			AFB2 (hypothetical protein LOC100216731	AFB2 (AUXIN SIGNALING F-BOX 2); auxin binding / ubiquitin-protein ligase
MZ00039233	30			AGO4 (hypothetical protein LOC100381552)	AGO4 (ARGONAUTE 4); nucleic acid binding		nucleus
MZ00014665	30			AGT2	AGT2 (ALANINE:GLYOXYLATE AMINOTRANSFERASE 2); alanine-glyoxylate transaminase/ catalytic/ pyridoxal phosphate binding / transaminase		mitochondrion
MZ00025817	30			AHA4 (membrane H(+)-ATPase1)	AHA11 (Arabidopsis H(+)-ATPase 11); ATPase		membrane
MZ00030971	30			AHG2 (hypothetical protein LOC100383372)	AHG2 (ABA-HYPERSENSITIVE GERMINATION 2); nucleic acid binding / ribonuclease
MZ00044092	30			APK (hypothetical protein LOC100276991)	adenylylsulfate kinase, putative		plastid
MZ00025875	30			APT3 (LOC100285146)	APT1 (ADENINE PHOSPHORIBOSYL TRANSFERASE 1); adenine phosphoribosyltransferase
MZ00003968	30			APX6 (hypothetical protein LOC100383462)	APX6; L-ascorbate peroxidase/ heme binding / peroxidase
MZ00024597	30			APY2 (hypothetical protein LOC100272244)	ATAPY2 (APYRASE 2)
MZ00030069	30			ARA12 (subtilisin-like protease)	ARA12; serine-type endopeptidase
MZ00021029	30			AT1G56505 (hypothetical protein LOC100280294)	haloacid dehalogenase-like hydrolase family protein
MZ00005156	30			AT2G17033 (hypothetical protein LOC100194308)
MZ00043960	30			AT3G06800	IBR3 (IBA-RESPONSE 3); acyl-CoA dehydrogenase/ oxidoreductase
MZ00028257	30	x		AT3G06980 (hypothetical protein LOC100280046)	DEAD/DEAH box helicase, putative
MZ00041394	30			AT3G08530 (hypothetical protein LOC100193501)	clathrin heavy chain, putative		membrane
MZ00025874	30			AT3G08950 (LOC100191148	electron transport SCO1/SenC family protein		plastid
MZ00026864	30			AT3G09320 (palmitoyltransferase PFA4)	zinc finger (DHHC type) family protein
MZ00018081	30			AT3G12270 (protein arginine N-methyltransferase 6	PRMT6 (PROTEIN ARGININE METHYLTRANSFERASE 6); methyltransferase
MZ00026003	30			AT3G13235	ubiquitin family protein
MZ00024636	30			AT3G14080 (small nuclear ribonucleoprotein LSM1)	small nuclear ribonucleoprotein, putative / snRNP, putative / Sm protein, putative		nucleus
MZ00016319	30			AT3G17800 (hypothetical protein LOC100276591)			plastid
MZ00033074	30			AT3G18240 (hypothetical protein LOC100277624)
MZ00036374	30			AT3G19350 (hypothetical protein LOC100381794)	PAB8 (POLY(A) BINDING PROTEIN 8); RNA binding / translation initiation factor
MZ00044697	30			AT3G25160 (ER lumen protein retaining receptor)	ERD2 (ENDOPLASMIC RETICULUM RETENTION DEFECTIVE 2); KDEL sequence binding / receptor		membrane
MZ00004158	30			AT3G25430 (hypothetical protein LOC100383807)			mitochondrion
MZ00042120	30			AT3G44100 (hypothetical protein LOC100193299)	MD-2-related lipid recognition domain-containing protein / ML domain-containing protein		membrane
MZ00018640	30			AT3G45620 (hypothetical protein LOC100272942)	transducin family protein / WD-40 repeat family protein	transducin family protein / WD-40 repeat family protein
MZ00019409	30			AT3G47120 (RNA-binding motif protein, X-linked 2)	RNA recognition motif (RRM)-containing protein
MZ00026135	30			AT3G48390 (LOC100281524)	MA3 domain-containing protein
MZ00024817	30			AT3G48710 (dek protein)			membrane
MZ00017815	30			AT3G50845 (hypothetical protein LOC100272631)
MZ00020618	30	x		AT3G50880 (hypothetical protein LOC100194229)	HhH-GPD base excision DNA repair family protein		plastid
MZ00017426	30			AT3G55480 (hypothetical protein LOC100383432)	adaptin family protein		mebrane
MZ00001175	30			AT4G02470	AAA-type ATPase family protein		plastid
MZ00013447	30			AT4G29480 (LOC100283237)	mitochondrionondrial ATP synthase g subunit family protein
MZ00026959	30			AT4G32910 (hypothetical protein LOC100381924)
MZ00055849	30			AT5MAT (hypothetical protein LOC100272672)
MZ00016501	30			ATB' BETA (hypothetical protein LOC100191991)	ATB BETA; nucleotide binding / protein phosphatase type 2A regulator
MZ00055996	30			ATDFD (folylpolyglutamate synthase)	ATDFB (A. THALIANA DHFS-FPGS HOMOLOG B); tetrahydrofolylpolyglutamate synthase		mitochondrion
MZ00027778	30			ATE1 (hypothetical protein LOC100216777)	ATE1; nucleic acid binding / nucleotide binding
MZ00049655	30			ATHCHIB (LOC100284192)	ATHCHIB (ARABIDOPSIS THALIANA BASIC CHITINASE); chitinase		membrane
MZ00013994	30			ATJ3 (chaperone DNA J2)	ATJ3; protein binding		mitochondrion
MZ00030882	30			ATORC3/ORC3 (origin recognition complex subunit 3)	ORC3 (ORIGIN RECOGNITION COMPLEX SUBUNIT 3); protein binding		plastid
MZ00017927	30			ATOSM34 (stress-induced protein1	ATOSM34 (osmotin 34)
MZ00014305	30			AtRABE1d/AtRab8C (ras-related protein ARA-3)	ATRAB8A; GTP binding
MZ00024136	30			AXS1 (bifunctional polymyxin resistance arnA protein)	AXS2 (UDP-D-APIOSE/UDP-D-XYLOSE SYNTHASE 2); UDP-glucuronate decarboxylase
MZ00041867	30			BTI3 (LOC100191362)	BTI1 (VIRB2-INTERACTING PROTEIN 1)		ER
MZ00044520	30			CBL10 (hypothetical protein LOC100193926)	CBL10 (CALCINEURIN B-LIKE 10); calcium ion binding
MZ00041648	30			CDC2A (cell division control protein2 homolog	CDC2 (CELL DIVISION CONTROL 2); cyclin-dependent protein kinase/ kinase/ protein binding / protein kinase
MZ00037116	30			CDPK1 (LOC100281687)	CPK7 (calmodulin-domain protein kinase 7); ATP binding / calcium ion binding / calmodulin-dependent protein kinase/ kinase/ protein kinase/ protein serine/threonine kinase/ protein tyrosine kinase
MZ00035618	30			cesa3 (cellulose synthase3)	CESA1 (CELLULOSE SYNTHASE 1); cellulose synthase/ transferase, transferring glycosyl groups
MZ00024455	30			cl12292_1a (LOC100279326)
MZ00019503	30			cl17799_1 (LOC100272734)	MEKK1 (MAP KINASE KINASE KINASE 1); DNA binding / MAP kinase kinase kinase/ kinase/ kinase binding / protein binding
MZ00021314	30			cl824_1 (LOC100283703)	DNAJ heat shock protein, putative
MZ00029904	30			cl9751_1a (LOC100272359)	emb1417 (embryo defective 1417)
MZ00038782	30			COP9 (hypothetical protein LOC100273709)	COP9 (CONSTITUTIVE PHOTOMORPHOGENIC 9); metalloendopeptidase/ protein binding		nucleus
MZ00016062	30	x		CP12-1 (LOC100281649)	CP12-1		plastid
MZ00044098	30			CPK30 (LOC100273840)	CPK13; ATP binding / calcium ion binding / calmodulin-dependent protein kinase/ kinase/ protein kinase/ protein serine/threonine kinase/ protein tyrosine kinase
MZ00027398	30			DEGP7 (hypothetical protein LOC100382830)	DegP7 (DegP protease 7); catalytic/ protein binding / serine-type endopeptidase/ serine-type peptidase
MZ00037295	30			DL4245C	ferredoxin hydrogenase		plastid
MZ00043268	30			EDA27/NOP10 (h/ACA ribonucleoprotein complex subunit 3-like protein)	NOP10; RNA binding
MZ00025118	30			EIF3E (eukaryotic translation initiation factor 3 subunit 6)	EIF3E (EUKARYOTIC TRANSLATION INITIATION FACTOR 3E); translation initiation factor
MZ00018314	30			EOL1 (LOC100281454)	EOL1 (ETO1-LIKE 1); binding / protein binding
MZ00027344	30			ETHE1/GLX2-3 (LOC100283164)	GLY3 (GLYOXALASE II 3); hydrolase/ hydroxyacylglutathione hydrolase
MZ00029125	30			EXGT-A1 (LOC100282604)	EXGT-A4 (ENDOXYLOGLUCAN TRANSFERASE A4); hydrolase, acting on glycosyl bonds / hydrolase, hydrolyzing O-glycosyl compounds / xyloglucan:xyloglucosyl transferase
MZ00028437	30			F10B6.40 (phosphatidylinositol transfer protein CSR1)	SEC14 cytosolic factor, putative / phosphoglyceride transfer protein, putative
MZ00020970	30			F11C10.32 (hypothetical protein LOC100279818)	basic helix-loop-helix (bHLH) family protein	basic helix-loop-helix (bHLH) family protein
MZ00018986	30	x		F11C10.7 (LOC100383365)
MZ00017786	30			F11C18.10 (CHY1	3-hydroxyisobutyryl-coenzyme A hydrolase, putative / CoA-thioester hydrolase, putative		mitochondrion
MZ00018766	30			F11I11.120 (amidase)	amidase family protein		membrane
MZ00041980	30			F12A21.14 (glossy8)	YBR159; ketoreductase/ oxidoreductase
MZ00043206	30	x		F12E4.250 (LOC100194303)	ATNUC-L1; nucleic acid binding / nucleotide binding
MZ00035680	30			F12K8.8 (peptide transporter PTR2-B)	proton-dependent oligopeptide transport (POT) family protein		membrane
MZ00047999	30			F13E7.5 (calmodulin)	calmodulin, putative
MZ00019193	30			F14G9.4 (hypothetical protein LOC100272613)	pseudouridine synthase family protein
MZ00044148	30			F16A14.4 (LOC100191741)	hydrolase, alpha/beta fold family protein
MZ00030362	30			F16G20.2 (hypothetical protein LOC100280187)	fringe-related protein
MZ00028249	30			F17A14.4 (hypothetical protein LOC100193530)	radical SAM domain-containing protein
MZ00019798	30			F17A22.21 (hypothetical protein LOC100279470)
MZ00016881	30			F17H15.17 (hypothetical protein LOC100279395)
MZ00048491	30			F17L22.230	pseudouridine synthase family protein
MZ00029001	30			F17L24.13 (LOC100282960)			membrane
MZ00025480	30			F1C12.180 (LOC100283627)	DREPP plasma membrane polypeptide family protein		membrane
MZ00017339	30	x		F1N13.60 (hypothetical protein LOC100381612)	structural maintenance of chromosomes (SMC) family protein (MSS2)		nucleus
MZ00025168	30	x		F1N18.9	tRNA synthetase class II (G, H, P and S) family protein
MZ00033474	30			F20B17.5 (hypothetical protein LOC100192366)	leucine-rich repeat transmembrane protein kinase, putative		mitochondrion
MZ00056492	30			F23E12.210 (hypothetical protein LOC100273485)	BSK1 (BR-SIGNALING KINASE 1); ATP binding / binding / kinase/ protein kinase/ protein tyrosine kinase		membrane
MZ00001527	30			F23J3.70 (ribonucleoprotein)			plastid
MZ00014079	30	x		F24D7.4 (hypothetical protein LOC100280242)	peptidase M1 family protein		plastid
MZ00037170	30			F24J8.9 (LOC100282137)	nodulin MtN3 family protein		membrane
MZ00014753	30			F25I18.5 (mitochondrionondrial chaperonin 60)	HSP60 (HEAT SHOCK PROTEIN 60); ATP binding		mitochondrion
MZ00056158	30	x		F26B6.7 (LOC100286133)	NAPRT2 (NICOTINATE PHOSPHORIBOSYLTRANSFERASE 2); nicotinate phosphoribosyltransferase		plastid
MZ00034997	30			F27G19.90 (hypothetical protein LOC100382718)	3' exoribonuclease family domain 1-containing protein
MZ00001054	30			F2O10.5 (hypothetical protein LOC100279902)	leucine-rich repeat family protein		membrane
MZ00043779	30	x	x	F3H9.20 (hypothetical protein LOC100191639)
MZ00042377	30			F3K23.28	transporter		membrane
MZ00025499	30			F3O9.15 (LOC100280722)	inosine-5'-monophosphate dehydrogenase, putative
MZ00044102	30			F5E6.14 (LOC100193917)	binding		membrane
MZ00036561	30			F5E6.6 (huntingtin interacting protein K)	DNA-binding enhancer protein-related
MZ00027883	30			F5H14.24 (adaptor complexes medium subunit family protein)	protein binding
MZ00015917	30			F5I6.5 (LOC100272602)	NTT1 (NUCLEOTIDE TRANSPORTER 1); ATP:ADP antiporter		plastid
MZ00016557	30			F6A14.19 (hypothetical protein LOC100280205)	DNAJ heat shock N-terminal domain-containing protein		ER
MZ00042521	30			F6F22.10 (hypothetical protein LOC100273751)	tRNA/rRNA methyltransferase (SpoU) family protein
MZ00018031	30			F6K5.3 (hypothetical protein LOC100272410)	presenilin family protein		plastid
MZ00025874	30			F6N15.8 (hypothetical protein LOC100382756)	transducin family protein / WD-40 repeat family protein		membrane
MZ00056946	30			F7F23.10 (hypothetical protein LOC100277858)			membrane
MZ00013919	30			F7J7.90 (hypothetical protein LOC100273881)	HAP6 (HAPLESS 6); dolichyl-diphosphooligosaccharide-protein glycotransferase		ER
MZ00017624	30			F8A5.24 (hypothetical protein LOC100273138)	ATB2; oxidoreductase
MZ00005887	30			F8L15.160 (hypothetical protein LOC100216926)			nucleus
MZ00026869	30			F8N16.13 (LOC100191406)	ankyrin repeat family protein
MZ00024037	30			fdh2 (formate dehydrogenase2)	FDH (FORMATE DEHYDROGENASE); NAD or NADH binding / binding / catalytic/ cofactor binding / oxidoreductase, acting on the CH-OH group of donors, NAD or NADP as acceptor
MZ00007579	30			FKBP12 (LOC542519)	FKBP12 (FK506-BINDING PROTEIN); FK506 binding / peptidyl-prolyl cis-trans isomerase
MZ00014660	30			FUS12 (COP9 signalosome complex subunit	FUS12 (FUSCA 12)
MZ00056204	30			GAE6 (NAD-dependent epimerase/dehydratase family protein)	GAE6 (UDP-D-GLUCURONATE 4-EPIMERASE 6); UDP-glucuronate 4-epimerase/ catalytic
MZ00023266	30			GATB (hypothetical protein LOC100381695	GATB (GLU-ADT SUBUNIT B); carbon-nitrogen ligase, with glutamine as amido-N-donor / glutaminyl-tRNA synthase (glutamine-hydrolyzing)/ ligase		mitochondrion
MZ00018557	30			GATL10 (hypothetical protein LOC100191570)	LGT8 (GLUCOSYL TRANSFERASE FAMILY 8); polygalacturonate 4-alpha-galacturonosyltransferase/ transferase, transferring glycosyl groups / transferase, transferring hexosyl groups		membrane
MZ00017555	30			GMD1 (GDP-mannose 4,6 dehydratase 2)	MUR1 (MURUS 1); GDP-mannose 4,6-dehydratase
MZ00016005, MZ00042004	30			gpm233 (LOC100273479)	RCI3 (RARE COLD INDUCIBLE GENE 3); peroxidase
MZ00039114, MZ00044563	30			gpm341 (LOC100217311)	UBX domain-containing protein
MZ00016135	30			gpm481 (LOC100275746)
MZ00041997	30	x		GRF4 (14-3-3-like protein A)	GRF2 (GENERAL REGULATORY FACTOR 2); protein binding / protein phosphorylated amino acid binding		nucleus
MZ00037430	30			GRF9 (growth-regulating factor 9-like)	AtGRF5 (GROWTH-REGULATING FACTOR 5); transcription activator	AtGRF5 (GROWTH-REGULATING FACTOR 5); transcription activator
MZ00016849	30			GWD1 (LOC100381411)	SEX1 (STARCH EXCESS 1); alpha-glucan, water dikinase		mitochondrion
MZ00042122	30	x		hda106 (LOC541932)
MZ00015472	30			HMT3 (homocysteine S-methyltransferase-2	HMT2 (HOMOCYSTEINE METHYLTRANSFERASE 2); homocysteine S-methyltransferase
MZ00019413	30			HO2 (LOC100272729)	HO2 (HEME OXYGENASE 2); heme oxygenase (decyclizing)		plastid
MZ00031855	30			hox1a (Zmhox1a homeobox protein)		hox1a (Zmhox1a homeobox protein)
MZ00018411	30			IAA8 (IAA5 - auxin-responsive Aux/IAA family member)	PAP2 (PHYTOCHROME-ASSOCIATED PROTEIN 2); transcription factor	PAP2 (PHYTOCHROME-ASSOCIATED PROTEIN 2); transcription factor
MZ00043614	30			IDP1674 (LOC100127002)	UBP24 (UBIQUITIN-SPECIFIC PROTEASE 24); ubiquitin thiolesterase/ ubiquitin-specific protease
MZ00026337	30	x		IDP193 (LOC100273786)	ATAPP1 (aminopeptidase P1)
MZ00031028	30			IDP2586 (LOC100275544
MZ00013743	30			ILL5 (hypothetical protein LOC100274316)	IAR3 (IAA-ALANINE RESISTANT 3); IAA-Ala conjugate hydrolase/ metallopeptidase
MZ00022019	30			K13H13.20 (ATP-dependent RNA helicase SUV3	ATP-dependent RNA helicase, mitochondrionondrial, putative
MZ00019096	30			K15E6.10 (3-5 exoribonuclease CSL4)	exoribonuclease-related		plastid
MZ00030305	30			K15E6.7 (hypothetical protein LOC100193855)	amino acid transporter family protein		membrane
MZ00031302	30			K16F4.11 (hypothetical protein LOC100194251)	SNX1 (SORTING NEXIN 1); phosphoinositide binding / protein binding
MZ00015526	30			K21L19.12 (glucan endo-1,3-beta-glucosidase 6)	glycosyl hydrolase family 17 protein		membrane
MZ00055190	30			K3K7.13 (hypothetical protein LOC100273721)	WD-40 repeat family protein	WD-40 repeat family protein
MZ00031332	30			K6A12.3 (hypothetical protein LOC100383749)	C2 domain-containing protein / GRAM domain-containing protein
MZ00014818	30			K9P8.13 (permease I)	permease, putative		membrane
MZ00027448	30			KING1 (AKIN gamma)	KING1 (SNF1-RELATED PROTEIN KINASE REGULATORY SUBUNIT GAMMA 1)
MZ00027065	30			KNAT5	KNAT5 (KNOTTED1-LIKE HOMEOBOX GENE 5); transcription activator/ transcription factor	KNAT5 (KNOTTED1-LIKE HOMEOBOX GENE 5); transcription activator/ transcription factor	nucleus
MZ00016657	30			LACS6 (AMP-binding protein	LACS7 (LONG-CHAIN ACYL-COA SYNTHETASE 7); long-chain-fatty-acid-CoA ligase/ protein binding
MZ00042071	30	x		LCV2 (hypothetical protein LOC100193368)	LCV2 (LIKE COV 2)
MZ00038239	30			LOC100038318 (zein proteinSF4C candidate5)
MZ00028236	30	x		LOC100191251 (hypothetical protein LOC100191251)	cadmium-responsive protein / cadmium induced protein (AS8)
MZ00017619	30			LOC100191744 (hypothetical protein LOC100191744)
MZ00017036	30			LOC100192034 (hypothetical protein LOC100192034)
MZ00037298	30	x		LOC100192687 (hypothetical protein LOC100192687)	(S)-2-hydroxy-acid oxidase, peroxisomal, putative / glycolate oxidase, putative / short chain alpha-hydroxy acid oxidase, putative
MZ00026109	30			LOC100192818 (hypothetical protein LOC100192818)	CDC48B; ATP binding / ATPase/ nucleoside-triphosphatase/ nucleotide binding
MZ00044568	30			LOC100192848 (hypothetical protein LOC100192848)	CYP71B37; electron carrier/ heme binding / iron ion binding / monooxygenase/ oxygen binding
MZ00029194	30			LOC100193005 (hypothetical protein LOC100193005)
MZ0004646	30			LOC100193162 (hypothetical protein LOC100193162)
MZ00027378	30			LOC100193163 (hypothetical protein LOC100193163)
MZ00020885, MZ00028351, MZ00048609	30	x	x	LOC100193195 (hypothetical protein LOC100193195)	COL9 (CONSTANS-LIKE 9); transcription factor/ zinc ion binding	COL9 (CONSTANS-LIKE 9); transcription factor/ zinc ion binding
MZ00018943	30			LOC100193510 (hypothetical protein LOC100193510)
MZ00048033	30			LOC100193544 (hypothetical protein LOC100193544)
MZ00013862	30			LOC100193643 (hypothetical protein LOC100193643)
[truncated: 1,241 more rows]
